1 **Full title:**

2 Triazole ureas covalently bind to strigolactone receptors and regulate signaling

3 **Running title:**

4 Covalent regulators of strigolactone

5

6 **Authors**

7 Hidemitsu Nakamura,<sup>1†</sup> Kei Hirabayashi,<sup>1†</sup> Takuya Miyakawa,<sup>1</sup> Ko Kikuzato,<sup>1</sup> Wenqian

8 Hu,<sup>1</sup> Yuqun Xu,<sup>1</sup> Kai Jiang,<sup>1</sup> Ikuo Takahashi,<sup>1</sup> Naoshi Dohmae,<sup>2</sup> Masaru Tanokura,<sup>1</sup>

9 Tadao Asami,<sup>1,3\*</sup>

10

11

12 **Affiliations**

13 <sup>1</sup> *Graduate School of Agricultural and Life Sciences, The University of Tokyo, 1-1-1*

14 *Yayoi, Bunkyo-ku, Tokyo 113-8657, Japan*

15 <sup>2</sup> *Biomolecular Characterization Unit, RIKEN Center for Sustainable Resource Science,*

16 *Wako, Saitama, Japan*

17 <sup>3</sup> *Department of Biochemistry, Faculty of Science, King Abdulaziz University, P.O. Box*

18 *80203, Jeddah 21589, Saudi Arabia*

19

20 **\*Corresponding author. Email: [asami@mail.ecc.u-tokyo.ac.jp](mailto:asami@mail.ecc.u-tokyo.ac.jp) (T.A.)**

21 <sup>†</sup>These authors contributed equally to this work.

22

23

24

25 **Abstract**

26 Strigolactones (SLs), a class of plant hormones with multiple functions, mediate plant-plant and  
27 plant-microorganism communications in the rhizosphere. In this study, we developed potent  
28 strigolactone antagonists, which covalently bind to the strigolactone receptor D14, by preparing  
29 an array of triazole urea compounds. Using yeast two-hybrid assays and rice tillering assays, we  
30 identified a triazole urea compound KK094 as a potent inhibitor of strigolactone receptors. The  
31 LC-MS/MS analysis and X-ray crystallography concluded that KK094 was hydrolyzed by D14,  
32 and that a reaction product of this degradation covalently binds to the Ser residue of the catalytic  
33 triad of D14. We also identified KK052 and KK073, whose effects on D14–D53/D14–SLR1  
34 complex formation were opposite due to a trifluoromethyl group on its benzene ring. These  
35 results demonstrate that triazole urea compounds are potentially powerful tools for agricultural  
36 application and may be useful for the elucidation of the complicated mechanism underlying SL-  
37 perception.

38  
39

40 **MAIN TEXT**

41  
42 **Introduction**

43 Strigolactones (SLs) are a class of plant hormones that control many aspects of plant growth and  
44 development. They promote the efficiency of arbuscular mycorrhizal symbiosis and the  
45 germination of parasitic plants of the Orobanchaceae family in the rhizosphere (1). Therefore,  
46 chemical regulators of SL functions might ultimately achieve widespread use in agricultural  
47 applications (2). To date, SL mimics have been developed to inhibit branching (2, 3) and trigger  
48 suicidal germination of parasitic weeds, and some compounds have succeeded in generating  
49 practical treatments that can induce suicidal germination of parasitic weeds in soil (4), and  
50 recently, several groups have reported the development of SL antagonists (5–9).

51       Important factors for SL perception and signaling have been identified using SL mutants  
52 (10), including those of D14, an  $\alpha/\beta$  hydrolase (ABH) (11, 12), D3/MAX2 (13, 14), an F-box  
53 protein, and D53/SMXLs (15–17). It was recently postulated that SL is received by D14, which  
54 forms a complex with D3/MAX2 and D53/SMXLs (16, 17). This interaction stimulates the  
55 degradation of SL signaling inhibitors, including D53/SMXLs, which promotes the assembly of  
56 the TOPLESS corepressor-nucleosome complex (18), and enhances the expression of SL-  
57 inducible genes. Once SL is received by D14, it is hydrolyzed by D14 and a cleaved D-ring  
58 fragment is produced (12, 19). Recently, the D-ring-derived cleaved fragment was reported to  
59 form a covalent bond with a His residue in the catalytic center of D14 (19, 20). The formation of  
60 the D14-covalently linked intermediate molecule (CLIM) complex induces a dramatic change in  
61 the conformation of D14 and the formation of the D14–D3/MAX2 complex, which is essential for  
62 SL signaling (21). In addition, the SL hydrolysis of D14 is also required for the complex  
63 formation directly with D53/SMXLs (16, 17) and another target SLR1 (19), which is a negative  
64 regulator of gibberellin signaling. However, the mechanism of their SL-dependent interactions  
65 remains unclear.

66 Therefore, the blockade of the hydrolytic activity of D14 is a promising approach for the  
67 development of SL signaling inhibitors. D14 is an ABH, which belongs to a serine-hydrolase  
68 family. Serine-hydrolases universally possess a nucleophilic Ser-residue in their active sites,  
69 which is used for hydrolysis of their substrates. This nucleophilicity can be a target for covalent  
70 modification by reactive electrophiles. Indeed, wide-ranging types of electrophiles, including  $\beta$ -  
71 lactams/ $\beta$ -lactones, fluorophosphonates, and carbamates covalently modify the Ser-residue of  
72 target proteins (22). The tetrazole urea LY2183240-induced inhibition occurred via covalent  
73 carbamylation of the serine nucleophile of FAAH (23). In addition, an isoxazolonyl urea and a  
74 1,2,4-triazole urea were potent inhibitors of serine hydrolases (24, 25). These reports suggest that  
75 *N*-heterocyclic ureas, which can attack the nucleophilic Ser-residue in active sites of their targets,  
76 are a potent scaffold for serine hydrolase inhibitor design. Adibekian et al. synthesized a variety  
77 of 1,2,3-triazole ureas using click chemistry and determined that they selectively inhibit enzymes  
78 from diverse branches of the mammalian serine hydrolase family (26).

79 Here, we report that some 1,2,3-triazole ureas can inhibit the hydrolytic activity of the SL  
80 receptor D14 and stimulate rice tillering by blocking SL signaling. We also showed that D14  
81 could degrade KK094, a potent 1,2,3-triazole urea D14-inhibitor. Using LC-MS/MS analysis and  
82 X-ray crystallography, we further confirmed that a reaction product of this degradation covalently  
83 binds to the Ser residue of the catalytic triad of D14. We also identified KK052 and KK073,  
84 whose effects on D14–D53 complex formation were opposite due to the presence or absence of  
85 trifluoromethyl group on the benzene ring. These compounds may have a potential as a useful  
86 tool to deepen our understanding of the molecular mechanism underlying SL-perception.

87

88

89

90 **Results**

## 91 **Synthesis and selection of candidate compounds for SL-receptor inhibitors by the** 92 **yeast two-hybrid assay**

93 According to the former report (26), we synthesized a series of 1,2,3-triazole ureas by mixing  
94 unsubstituted 1,2,3-triazole and five different carbamoyl chlorides with *N,N*-dimethyl-4-  
95 aminopyridine. This synthetic procedure yielded mixtures of N1- and N2-carbamoylated  
96 regioisomers. Most of these mixtures were separated by silica gel chromatography, and we  
97 obtained eight different 1,2,3-triazole urea congeners (Fig. 1A, **1–8**).

98 To test whether these compounds are potent inhibitors of D14, we used the yeast two-  
99 hybrid (Y2H) assay to monitor SL-dependent D14–D53 interaction. Growth of AH109 yeast  
100 transformed with pGBK-D14 and pGAD-D53 in the SD+His Ade media were not inhibited by  
101 any KK compounds tested at the concentration of 50  $\mu$ M showing that all KK compounds are not  
102 toxic for yeast growth at this concentration (data not shown). All tested compounds inhibited the  
103 D14–D53 interaction induced by GR24, a synthetic SL mimic, although the inhibitory effect of  
104 KK003 (**3, 4**) was weaker than that of the other congeners (Fig. 1B).

105 To obtain highly specific and potent D14 inhibitors, we then diversified the structures of  
106 1,2,3-triazole urea compounds. The 1,2,3-triazole urea scaffold consists of two major sites for  
107 diversification: the carbamoyl group and the 1,2,3-triazole leaving group. Adibekian et al. showed  
108 that 4-substitution of the 1,2,3-triazole group of 1,2,3-triazole ureas enhanced their potency and  
109 selectivity as serine hydrolase inhibitors (26). Therefore, we introduced various substituents onto  
110 the 4-position of the 1,2,3-triazole group of KK007, which clearly inhibited the D14–D53 and  
111 D14–SLR1 interactions induced by GR24 (fig. S1A, **9–15**). We tested these in the Y2H assay, but  
112 none of these compounds inhibited the D14–D53 and D14–SLR1 interactions induced by GR24  
113 (fig. S1B), indicating that the unsubstituted 1,2,3-triazole is essential for the inhibition of D14  
114 activity.

115 Next, we diversified our collection of D14 inhibitor candidates by converting carbamoyl  
116 groups. We synthesized 1,2,3-triazole urea compounds by modifying the morpholine structure of  
117 KK004 (fig S1C, **16–25**), and the pyrrolidine structure of KK007 (Fig. 1A, **26–27**). All of these  
118 were tested in the Y2H assay (Fig. 1D and fig. S1D). As a result, we selected KK002-N1,  
119 KK004-N1, KK007-N1, KK052, KK053, KK055, KK075, and KK094 for further assays.

120

## 121 **Inhibitory effects of candidate compounds on the suppression of rice tillering by** 122 **GR24**

123 To confirm whether the selected compounds are good SL-receptor inhibitor candidates, we used  
124 *in planta* assays. In hydroponically grown rice seedlings, the first and second tiller buds of SL-  
125 deficient mutants, such as *d10* and *d17*, grow out, whereas those of wild-type plants remain  
126 dormant (27). Treatment of these mutants with SLs restores the dormant phenotype of the first  
127 and second tiller buds. Therefore, we performed a rice tillering assay to test whether 1,2,3-triazole  
128 ureas attenuate the tiller-inhibiting effects of SLs. When 10  $\mu$ M of 1,2,3-triazole ureas and 0.1  $\mu$ M  
129 of GR24 were applied together to hydroponically grown *d17-1* rice, several 1,2,3-triazole ureas  
130 restored the growth of the first and second tiller bud that had been suppressed by GR24 (Fig. 1C).  
131 KK052 (**16**), KK053 (**17**), and KK094 (**26**) significantly restored the tiller bud outgrowth of rice  
132 (Fig. 1C). Among them, the effect of KK094 treatment was prominent. KK094 did not inhibit the  
133 growth of rice, while KK052 did (fig. S2). We then substituted the 1,2,3-triazole group of KK094  
134 to 1,3-imidazole group to yield KK122 and tested it using the Y2H assay and the rice tillering  
135 assay. KK122 did not inhibit the GR24-induced D14–D53 and D14–SLR1 interactions, or the  
136 tillering inhibition produced by GR24 (fig. S3). These data indicate that the 1,2,3-triazole group is  
137 indispensable for the inhibition of D14 function. Next, we generated various KK094 derivatives  
138 by modifying the indolinyll structure of KK094 (fig. S4, **29–41**); however, none of these was a

139 stronger inhibitor than KK094. Thus, we selected KK094 as the most potent SL-receptor inhibitor  
140 candidate, and KK122 as a negative control compound of KK094.

141 We then treated hydroponically grown seedlings of wild-type rice (Nipponbare) with 10  
142  $\mu\text{M}$  KK094 and found that it significantly promoted the outgrowth of the first and second tiller  
143 buds (Fig. 1D), and this outgrowth promotion was concentration-dependent (Fig. 1E). The KK094  
144 treatment decreased plant height. A semi-dwarf phenotype is a characteristic of SL-deficient  
145 mutants. These features resulting from KK094 treatment support the hypothesis that this  
146 compound acts as an SL-signaling inhibitor in rice. Furthermore, we investigated whether KK094  
147 can inhibit the germination of parasitic plants and found that it could inhibit GR24-induced seed  
148 germination of *Striga hermonthica* (fig. S5A).

### 150 **KK094 inhibits SL-hydrolysis**

151 Because KK094 was originally designed to inhibit the SL-hydrolytic activity of D14 by direct  
152 binding to its catalytic center, we tested whether KK094 inhibits D14-induced SL-hydrolysis.  
153 When 0.2  $\mu\text{M}$  of GR24 was incubated with the purified recombinant D14 for 30 min, and GR24  
154 and the reaction product, ABC-OH, were extracted and detected by LC-MS, a decrease in the  
155 amount of GR24, and an increase in the amount of ABC-OH were observed (fig. S6A–C). We  
156 next conducted the SL-hydrolysis assay at various concentrations of KK094. As a result, KK094  
157 efficiently inhibited the decrease in the amount of GR24, and the increase in the amount of ABC-  
158 OH produced by D14, and these inhibitory effects were concentration-dependent (Fig. 2A).  
159 KK094 itself was also hydrolyzed by D14 (fig. S6D), indicating that the hydrolyzed product may  
160 bind to the catalytic pocket of D14 and impede entry of SL into the pocket.

161 Yoshimulactone Green (YLG) is a fluorogenic SL-agonist which suppresses the more  
162 axillary branching phenotype of the *Arabidopsis max4* mutant and stimulates the seed  
163 germination of *Striga* (28). YLG can be efficiently hydrolyzed by AtD14 and *Striga hermonthica*

164 SL receptors (ShHTLs). YLG-hydrolysis by SL receptors generates the fluorescent product. First,  
165 we observed that recombinant D14 protein hydrolyzed YLG to yield green fluorescence, which  
166 over time showed a Michaelis constant ( $K_m^{\text{YLG}}$ ) value at 1.84  $\mu\text{M}$  (Fig. 2C). This reaction was  
167 competitively inhibited by GR24, and the median inhibitory concentration ( $\text{IC}_{50}$ ) was 5.8  $\mu\text{M}$  (Fig.  
168 2B). Then we investigated whether KK094 competes with YLG in its hydrolysis by D14. KK094  
169 is a mixture of regioisomers, KK094-N1 and KK094-N2, which we separated using silica gel  
170 chromatography. Both the N1 and N2 isomers of KK094 inhibited YLG hydrolysis by D14, with  
171  $\text{IC}_{50}$  values of 1.8 and 7.9  $\mu\text{M}$ , respectively (Fig. 2B). KK122 did not inhibit YLG hydrolysis (Fig.  
172 2B), indicating that the 1,2,3-triazole moiety is essential for the inhibition of YLG hydrolysis and  
173 that the inhibition of YLG hydrolysis is required for the inhibition of SL-signaling. The  $K_m^{\text{YLG}}$   
174 value was unchanged in the presence of KK094-N1 at a concentration of 0.3  $\mu\text{M}$ . However,  
175 KK094-N1 treatment at a concentration of 0.3  $\mu\text{M}$  decreased the  $V_{\text{max}}^{\text{YLG}}$  to nearly half the level  
176 observed following sham treatment (Fig. 2C), and the increase of KK094-N1-pretreatment time  
177 potentiated the inhibitory effect (Fig. 2D). These data strongly support the hypothesis that KK094  
178 is a covalent inhibitor of D14.

179 We also assessed the inhibitory effect of KK094 on SL-hydrolysis activity of *Striga* SL-  
180 receptors using YLG. *S. hermonthica* receives SL by the ShHTL protein, of which there are 11  
181 subtypes, upon SL-induced seed germination. Among them, the ShHTL7 subtype is reported to be  
182 the most sensitive SL receptor (29) mediating SL-induced seed germination, therefore, we used  
183 the ShHTL7 protein in the YLG assay. The  $\text{IC}_{50}$  of KK094 was more than 20  $\mu\text{M}$ , while that of  
184 GR24 was 0.15  $\mu\text{M}$  (fig. S5B).

185 Next we monitored the interaction between KK094 and D14 using differential scanning  
186 fluorimetry (DSF). DSF revealed a shift in the D14 melting temperature in the presence of KK094,  
187 indicating that KK094 interacts with D14 and changes its stability; however, with KK094  
188 treatment, this shift was not observed in D14<sup>H297A</sup> in which the catalytic residue is mutated (19)



189 (Fig. 2E). The 8 °C increase in D14 melting temperature suggests that the stabilization of D14 and  
190 the potent inhibitory effect of KK094 are correlated.

191

### 192 **KK094 inhibits SL-induced formation of the D14–D53 complex *in vitro***

193 We performed *in-vitro* pull-down assays (Fig. 3A) using a two-step treatment of D14 with test  
194 compounds; D14 was treated with the first compound, and then washed and incubated with D53  
195 in the presence of the second compound. The single treatment with KK094 did not induce the  
196 D14–D53 interaction when it was added in either step. Meanwhile, the single treatment with  
197 GR24 did not induce the interaction when it was added in the first step, but it did only when  
198 added in the second step, indicating that a hydrolyzed product of GR24 could be washed away  
199 from the catalytic pocket. However, when D14 was treated with KK094 (first step) and GR24  
200 (second step), the interaction was not detected, indicating that a hydrolyzed product of KK094  
201 stayed in the pocket and inhibited GR24 hydrolysis, and the hydrolyzed product was not washed  
202 away in the washing step. These results strongly support a mechanism of covalent inhibition by  
203 KK094. A concurrent treatment with KK094 and GR24 weakened the interaction between D14  
204 and D53 as compared with GR24 alone.

205

### 206 **Crystal structure of the D14–KK094 complex**

207 To determine the binding mode of KK094 in the catalytic pocket of D14, we solved the crystal  
208 structure of the D14–KK094 complex at 1.45 Å resolution (table S1, Fig. 3B). The asymmetric  
209 unit contains two molecules of D14 with almost identical structures; the root mean square  
210 deviation (r.m.s.d.) was 0.37 Å for the main chain C $\alpha$  atoms. As reported previously, D14  
211 consisted of a core domain, also known as  $\alpha/\beta$  hydrolase domain (30), and a cap domain  
212 composed of four helices forming two antiparallel V shapes (Fig. 3B). A catalytic pocket was  
213 formed between the two domains, and the catalytic residue S147 is located at the bottom of the

214 pocket and is aligned with H297 and D268 to form the catalytic triad. The electron density map of  
215 the D14–KK094 complex clearly showed the existence of a covalently bound KK094-derived  
216 carbamoyl moiety (KK094CM), which is assumed to be a hydrolyzed product of KK094, to the  
217 hydroxyl group of S147 (Fig. 3C). In the complex structure of D14–KK094CM, the covalently  
218 bound KK094CM was embedded completely in the cavity and was surrounded by V148, V240,  
219 C241, V244, S270 and H297, and several aromatic residues, such as F78, F176 and F245 (Fig.  
220 3D). These residues made favorable hydrophobic and/or van der Waals interactions with  
221 KK094CM. In addition, the carbonyl group of KK094CM formed a hydrogen bond network with  
222 F78, V148, and H297 including two water molecules (Fig. 3D). In this complex structure,  
223 KK094CM is deduced to deprive canonical substrates of opportunities to invade and be  
224 hydrolyzed by occupying the active site in the catalytic pocket of D14. The D14–KK094CM  
225 complex and the apo-D14 (PDB ID 3VXK) (19) have almost identical structures (r.m.s.d. 0.16 Å),  
226 but some minor structural differences occurred in the catalytic pocket (fig. S7A). The side chain  
227 of S147 flipped toward KK094CM due to the covalent modification. In addition, upon KK094CM  
228 binding, the side chain of F245 moved 1 Å away from the KK094CM, creating a space to  
229 accommodate KK094 binding (fig. S7B). This change is consistent with previous structural  
230 studies regarding the flexibility of the Phe residue located in this conserved site (19, 31–33).

231

### 232 **Hydrolyzed product of KK094 covalently binds to D14**

233 We further confirmed whether KK094 covalently binds to D14 using Matrix Assisted Laser  
234 Desorption/Ionization-Time of Flight (MALDI-TOF) mass spectrometry and Liquid  
235 Chromatography-Tandem Mass Spectrometry (LC-MS/MS) analysis. D14 was incubated with or  
236 without KK094 in 1 mL of PBS at 25 °C for 35 min, and 100 µL of the reaction solution was  
237 analyzed using MALDI-TOF mass spectrometry (Fig. 4A). The molecular weight of D14  
238 incubated without KK094 was determined to be 29283.3 (-KK094; Fig. 4A), which was almost

239 the same as that deduced from the amino acid sequence of the purified D14 protein (molecular  
240 weight: 29285.8). The molecular weight of D14 incubated with KK094 was determined to be  
241 29429.7 (+KK094; Fig. 4A). The 146.4 Da difference was thought to represent the covalently  
242 bound KK094CM (Fig. 4A), which adds 145 Da.

243 The remaining reaction mixtures were then dialyzed and digested with trypsin, and  
244 generated peptides were analyzed using MALDI-TOF mass spectrometry (fig. S8A). The amino  
245 acid sequences of the digested peptides were deduced based on their molecular masses (table S2).  
246 The fragment corresponding to the peptide 141–159 ( $^{141}\text{CAFVGHSVSAMIGILASIR}^{159}$ ;  $m/z$   
247 1932.446) was not detected when D14 was incubated with KK094 (fig. S8B). On the contrary, the  
248 peptide fragment with molecular mass of 2077.454 was detected when D14 was incubated with  
249 KK094, although it was not detected when D14 was incubated without KK094. This fragment  
250 corresponds to the peptide 141–159 with covalently bound KK094CM (fig. S8B).

251 To confirm the carbamylation site in peptide 141–159, we conducted LC-MS/MS  
252 analysis (Fig. 4B). When trypsin-digested fragments of D14 incubated with KK094 were  
253 analyzed, the addition of 145 Da was observed in the y13 and y15 ions but not in the y4–y12 ions  
254 (Fig. 4B; table S3), demonstrating that carbamylation occurred at S147.

255

### 256 **Some KK052-derived 1,2,3-triazole ureas show agonist activity in the formation of** 257 **the D14–D53 complex**

258 As described above, KK052 acted as an SL-antagonist in Y2H and rice tillering assays (fig. S1C  
259 and D), but its inhibition seemed weaker than that of KK094 (Fig. 1A). Two KK052-derivatives,  
260 KK053 and KK055, showed antagonism both in the Y2H and rice tillering assays (fig. S1C, D  
261 and Fig. 1C). Unexpectedly, some KK052-derivatives, KK054, KK067, KK070, and KK073  
262 showed agonism in the formation of the D14–D53/D14–SLR1 complex in the Y2H assay (fig. S9

and Fig. 5A). Interestingly, these agonists had polar groups. Among them, the agonistic effect of KK073 was prominent (Fig. 5A). Thus, we further analyzed the activity of KK073.

### **KK052 inhibits the SL-induced formation of the D14–D53 complex and KK073-induced D14–D53 complex formation *in vitro***

We further conducted *in vitro* pull-down assays using GR24, KK052, and KK073 (Fig. 5B). Like the pull-down assay using KK094, we also used a two-step treatment of D14 with this group of compounds. A single treatment with KK052 did not induce the D14–D53 interaction when it was added in either step. As observed for the KK094 treatment (Fig. 3A), when D14 was treated with KK052 (first step) and then GR24 (second step), the D14–D53 interaction was not detected, indicating that a hydrolyzed product of KK052 (KK052CM) stayed in the pocket and inhibited the action of GR24. Meanwhile, the interaction between D14 and D53 was induced when KK073 was added in either step (Fig. 5B). When a combination of KK073 and KK052 was added, the interaction was induced only when KK073 was added in the first step. These results indicate that a hydrolyzed product of KK073, KK073CM, is not washed away from the catalytic pocket and promotes the formation of the D14–D53 complex by a mode of agonistic action different from GR24.

### **The hydrolyzed products of KK052 and KK073 covalently bind to D14**

To determine whether KK052 and KK073 also covalently bind to D14, we solved the crystal structures of the D14–KK052 and the D14–KK073 complex at 1.49 Å and 1.53 Å resolution, respectively (table S1 and Fig. 6A). The electron density map of the D14–KK052 and D14–KK073 complex clearly showed the existence of a covalently bound KK052CM or KK073CM, respectively, to the hydroxyl group of S147 (Fig. 6B). In these complex structures, the covalently bound KK052CM was embedded completely within the cavity, whereas the trifluoromethyl group

288 of KK073CM partially protruded out of the pocket. Both binding sites consisted of V148, I191,  
289 V194, C241, V244, S270 and H297, and several aromatic residues, such as F78, F176, F186,  
290 W205, Y209, and F245 (Fig. 6C). These residues made favorable hydrophobic and/or van der  
291 Waals interactions with KK052CM/KK073CM. In addition, the carbonyl group of  
292 KK052CM/KK073CM formed a strong hydrogen bond network with F78, V148, Y209, S270 and  
293 H297 mediated by three water molecules (Fig. 6C). Like KK094CM, KK052CM/KK073CM  
294 appears to deprive canonical substrates of opportunities to invade and react by occupying the  
295 active site. Interestingly, when the structure of the D14–KK073CM complex was compared to  
296 that of the D14–D-OH complex (PDB ID 3WIO) (19), the trifluoromethyl group of KK073  
297 resided at nearly the same site as the D-OH in the D14–D-OH complex (Fig. 6D). Both the  
298 trifluoromethyl group of KK073 and D-OH were located at the aperture of the binding pocket of  
299 D14 and surrounded by aromatic residues, such as F186, W205, Y209, and F245. In addition, the  
300 trifluoromethyl group of KK073 protruded from the binding pocket and was directly exposed to  
301 the solvent; fluorine atoms faced on the surface of D14, generating a polar region in the overall  
302 hydrophobic surface of D14 (Fig. 6E). To confirm this hypothesis, we tested KK182, in which a  
303 methylene group was inserted between the benzene ring and the piperazine ring, and the distance  
304 between the trifluoromethyl group and the carbonyl group is elongated. When KK182 was tested  
305 in the Y2H assay, KK182 antagonized the formation of D14–D53 (fig. S9B). These data support  
306 the hypothesis that the position of the trifluoromethyl group is critical for the agonistic effect on  
307 the formation of the D14–D53/D14–SLR1 complex.

308

### 309 **Both KK052 and KK073 antagonized the inhibition of rice tillering produced by SL**

310 From the above results, we assumed that KK052 acts as an SL-antagonist, and KK073 acts as an  
311 SL-agonist *in planta*. To confirm this assumption, we tested KK052 and KK073 in the rice  
312 tillering assay. Unexpectedly, both KK052 and KK073 showed inhibitory effects on the tillering

313 inhibition by GR24, and KK073 did not act as an SL-agonist (fig. S10A). Generally, SL-agonists  
314 decrease the D14 melting temperature (12, 20), which is required for the conformational change  
315 in the interaction with D3/MAX2. However, KK073 as well as KK094 (Fig. 2E), increased the  
316 melting temperature (fig. S10B), indicating that KK073 interacts with D14 and changes the  
317 stability of D14, and this shift was not observed in D14<sup>H297A</sup>. Consistent with this, we found that  
318 KK073 could not induce the interaction of D14 with the D3–OSK1 complex in the yeast three-  
319 hybrid assay (Fig. 5A).

320

321

## 322 **Discussion**

323 The irreversible mode of inhibition of covalent inhibitors has potential benefits, such as high  
324 potency extended duration of action as compared with that of the reversible mode of inhibition of  
325 noncovalent inhibitors. In this study, we reported the development of 1,2,3-triazole ureas with  
326 inhibitory effects on SL activity. Among them, KK094 was the most potent SL-inhibitor. KK094  
327 restored the growth of the first and second tiller bud of hydroponically grown *d17-1* rice that has  
328 been suppressed by GR24 (Fig. 1C). KK094 also showed an inhibitory effect on the regulation of  
329 tiller bud growth by SLs and the treatment of wild-type rice with KK094 stimulated the growth of  
330 tiller buds (Fig. 1D, E). KK094 efficiently inhibited the hydrolysis of GR24 by D14, and this  
331 inhibition did not change the  $K_m$  value, but markedly lowered the  $V_{max}$  value of the hydrolysis  
332 reaction (Fig. 2). Pull down analyses showed that KK094 prevents the formation of D14–D53  
333 complex *in vitro* (Fig. 3). KK094 could be hydrolyzed by D14 (fig. S6D), and the hydrolyzed  
334 product (KK094CM) covalently binds to the hydroxyl group of a Ser residue in the catalytic triad  
335 of D14, as indicated by the crystal structure analysis (Fig. 3B-D) and the LC-MS/MS analysis  
336 (Fig. 4). Based on these data, we conclude that KK094 is a potent covalent inhibitor for the  
337 strigolactone receptor.

338 Recently, Xiang et al. reported that  $\beta$ -lactones covalently bind to Arabidopsis D14 and  
339 inhibit the activity of AtD14 as an SL receptor (7). Here, we used 1,2,3-triazole ureas because  
340 they are easily synthesized using a simple scheme. This is a great advantage of 1,2,3-triazole  
341 ureas, and we synthesized a wide variety of 1,2,3-triazole urea compounds and tested them both  
342 using *in planta* and *in-vitro* assays and found some compounds with a spectrum of activities.  
343 Among them, we are interested in the compounds which seemed to act as agonists for the  
344 formation of D14–D53/D14–SLR1 complex in Y2H assays.

345 In our Y2H assays, KK052 inhibited SL-induced formation of the D14–D53 complex,  
346 while KK073 induced formation of the D14–D53 complex. This agonistic effect of KK073 was  
347 also observed in the pull-down assay. The difference between KK052 and KK073 is the existence  
348 of a trifluoromethyl group on the benzene ring. The opposite activity of KK052 and KK073  
349 resulted from the slight difference which provides clues to a deeper insight into the mechanism of  
350 the formation of the D14–D53 complex.

351 In the pull-down assay, KK094 inhibited SL-induced formation of the D14–D53 complex  
352 by forming a covalent bond with the catalytic S147 residue. This result indicates that the complex  
353 formation requires SL binding into the catalytic pocket followed by its hydrolysis. The previous  
354 report showed that the hydrolyzed product of SL covalently bound to the catalytic site of D14  
355 (20,21). They showed that this binding evoked dramatic changes in the overall structure of D14  
356 and induced D14–MAX2 complex formation (21). In contrast, SL-induced formation of the D14–  
357 D53 complex could not be detected following a washing step of D14 in complex with SL before  
358 the incubation with D53, suggesting that the hydrolyzed product of SL binds non-covalently to  
359 D14 and induces the formation of the D14–D53 complex. In our previous report, we observed the  
360 non-covalently bound D-OH in the entrance of the ligand binding pocket of D14. It is possible  
361 that this D-OH induces the formation of the D14–D53 complex in a way different from that in the  
362 formation of D14–MAX2 complex.



363 Unlike GR24, KK073 could induce the formation of the D14–D53 complex even when it  
364 was added before the washing step in the pull-down assay. Furthermore, we observed covalent  
365 binding of KK073CM to the S147 residue of D14 using X-ray crystallography. Interestingly, the  
366 trifluoromethyl group of KK073CM in the D14–KK073CM crystal resided at almost the same site  
367 as the D-OH in the D14–D-OH crystal (Fig. 8). Both the trifluoromethyl group of KK073 and D-  
368 OH were located at the aperture of the D14 binding pocket. No major change of the overall  
369 structure of the complex was observed in both the D14–D-OH (19) and D14–KK073CM  
370 complexes (fig. S7).

371 KK052 could not induce the D14–D53 interaction, while KK073 could function as an  
372 agonist for the formation of the D14–D53 complex. The position of KK073CM in the binding  
373 pocket of D14 was almost the same as that of KK052CM, and the only difference is the  
374 trifluoromethyl group on the benzene ring of KK073CM. These data strongly indicate that the  
375 formation of the D14–D53 complex requires an additional polar region (e.g., D-OH,  
376 trifluoromethyl group) at the entrance of the binding pocket of D14. In addition, there are no  
377 structural differences in D14 between the KK073CM- and KK052CM-bound forms, suggesting  
378 that the formation of the D14–D53 complex does not require the structural changes that are  
379 observed in the D14–D3/MAX2 complex. Indeed, we found that KK1073 could not induce the  
380 formation of the D14–D3/MAX2 complex in the yeast three-hybrid assay (Fig. 5C). Furthermore,  
381 KK073 increased the D14 melting temperature in the DSF assay (fig. S10B) as well as KK094,  
382 while SL-agonists generally decrease the D14 melting temperature (12,20). In general, the  
383 decrease of the melting temperature reflects the destabilization of protein that correlates with the  
384 conformational change, which is consistent with the dynamic structural changes of D14 in the  
385 complex with D3/MAX2 with SL-agonists. In the D14–D3/MAX2 complex, the reposition of the  
386 catalytic triad accompanying the formation of CLIM may induce the destabilization of D14 (21).  
387 On the other hand, covalently bound KK094CM/KK073CM interacts with many residues



388 composing the pocket and is likely to decrease their flexibility, resulting in the stabilization of  
389 D14. These data also support a model of the static formation of the D14–D53 complex.

390         These speculations raise the question of how D14 interacts with both D53 and D3/MAX2  
391 by different means. We do not have any direct evidence to answer this question. Investigation of  
392 the structure of the complex containing D14, D53 and D3/MAX2 might provide insights  
393 regarding this question.

394         Although KK094 strongly inhibited the SL activity in the suppression of the outgrowth of  
395 branching buds, the inhibitory effect of KK094 on the SL-induced germination of *Striga* seeds  
396 was relatively weak (fig S5). A greater KK094/GR24 ratio was required to inhibit *Striga* seed  
397 germination than to inhibit the tillering suppression activity of GR24. This weak inhibition of  
398 *Striga* seed germination by KK094 is consistent with the difference in IC<sub>50</sub> values for the  
399 hydrolysis activity of ShHTL7 and D14. However, modification of KK094 might improve its  
400 inhibitory effect on the functions of *Striga* HTL proteins. Thus, KK094 and its derivatives have  
401 the potential to regulate plant growth and seed germination of parasitic plants both in laboratories  
402 and in fields, and KK052/KK073 and their derivatives are expected to be powerful tools to  
403 elucidate the complicated mechanisms underlying SL-perception and signal transduction.

404  
405

## 406 **Materials and Methods**

407 **Plant materials and the rice tillering assay.** An SL-deficient rice mutant, *d10-2*, of the  
408 Japonica-type cultivar (*Oryza sativa* L. cv. Nipponbare) and a *d17-1* rice mutant of the Japonica-  
409 type cultivar (*Oryza sativa* L. cv. Shiokari) were used in this assay. The rice seeds were sterilized  
410 in a 2.5% sodium hypochlorite solution containing 0.02% Tween 20 for 20 min. The seeds were  
411 washed five times with sterilized water and then incubated in tubes filled with water at 25 °C in  
412 the dark for 2 days. The germinated seeds were planted in a hydroponic culture medium (34)  
413 solidified with 0.6% agar and cultivated at 25 °C under fluorescent light (70–100 μmol<sup>-2</sup> sec<sup>-1</sup>)

414 with a 16-hr light/8-hr dark photoperiod for 7 days. Each seedling was transplanted to a glass vial  
415 filled with 12 mL of sterilized hydroponic culture solution with or without an experimental  
416 compound and grown under the same conditions for 7 days.

417

418 **Yeast two-hybrid (Y2H) and yeast three-hybrid (Y3H) assays.** The Matchmaker Two-Hybrid  
419 System (Takara Bio, Otsu, Japan) was used for the Y2H assay. We used pGBK-D14 (19) as the  
420 bait and pGAD-SLR1 (19) or pGAD-D53 (6) as the prey. The *Saccharomyces cerevisiae* AH109  
421 strain was transformed with the bait and prey plasmids and grown in liquid medium for 2 days.  
422 The plate assays (synthetically defined medium without histidine and adenine) were performed  
423 according to the manufacturer's protocol, except that the plate medium contained various  
424 combinations of SLs and test compounds. For the Y3H assay, the yeast strains AH109 and the  
425 plasmids pGADT7 were also used and pBridge were obtained from Takara Bio Inc. pBridge-  
426 BD:D14-M:OSK1 was constructed by fusing D14 cDNA with the GAL4-BD domain and  
427 inserting OSK1 cDNA (Os11g0456300) into the site downstream of pMET25. pGAD-D3 was  
428 constructed by fusing D3 cDNA (AK065478) with the GAL-AD domain. AH109 was  
429 transformed with the pBridge-BD:D14-M:OSK1 and pGAD-D3 or pGADT7 selected on SD  
430 media lacking L-tryptophan (SD-Trp Leu Met). For the assay, the transformants were incubated  
431 on SD-Trp, Leu and Met media that lacked Ade and His (SD-His Ade Met).

432

433 ***Striga* germination assay.** *Striga* seed germination assay was performed as described previously  
434 (35). Seeds of *Striga hermonthica* harvested in Sudan were kindly provided by Professor A.E.  
435 Babiker (Sudan University of Science and Technology) and imported with the permission of the  
436 Minister of Agriculture, Forestry and Fisheries of Japan. Seeds of *S. hermonthica* were sterilized  
437 with a 1% sodium hypochlorite solution containing 0.01% Tween 20 for 5 min and washed five  
438 times with sterilized water. The seeds were then added to a 0.1% agar solution and dropped onto

439 small, round, glass-fiber filters. Filters containing the seeds were arranged on a filter paper (70  
440 mm diameter) in a Petri dish, and 1400  $\mu$ L of sterilized water including the appropriate chemical  
441 was added to the dish. The dishes were incubated at 30 °C in the dark for 4 days. The small filters  
442 containing the seeds were transferred to a 96-well plate, and 10  $\mu$ L of sterilized water or water  
443 including the appropriate chemical was added to each well. After incubation for 2 days under the  
444 same conditions, the number of germinated seeds was counted.

445

446 **Protein preparation.** D14 was expressed in *E. coli* and purified as described previously (2).  
447 Briefly, D14 (residues 54–318) from rice was expressed with the pET-49b expression vector  
448 (Merck-Millipore) in *E. coli* Rosetta (DE3) cells (Merck-Millipore). The cells were harvested,  
449 resuspended in extraction buffer (20 mM Tris-HCl (pH 8.5), 500 mM NaCl, 10% glycerol and  
450 3 mM dithiothreitol (DTT)), and disrupted by sonication. The soluble fraction separated by  
451 centrifugation was purified using Glutathione Sepharose 4B resin (GE Healthcare). For  
452 crystallization, on-column cleavage was performed by adding HRV3C protease, and the eluted  
453 D14 was further purified using a Resource S column (GE Healthcare). The purified D14 was  
454 concentrated to 6.0 mg mL<sup>-1</sup> in buffer containing 20 mM MES-NaOH (pH 6.5), 300 mM NaCl,  
455 10% glycerol, and 5 mM DTT. For pull-down assays, GST fusion D14 was eluted with elution  
456 buffer (20 mM Tris-HCl (pH 7.8), 500 mM NaCl, 100 mM reduced glutathione and 5 mM DTT).  
457 After the eluted product was concentrated and diluted 25-fold in elution buffer lacking NaCl and  
458 reduced glutathione, GST-D14 was further purified using a Resource S column. The purified  
459 GST-D14 was concentrated to 5  $\mu$ M in buffer containing 20 mM Tris-HCl (pH 7.8), 100 mM  
460 NaCl and 5 mM DTT. The *D53* open reading frame fragment was amplified by PCR using total  
461 complementary DNA from rice seedlings. For expression in *E. coli*, the PCR product was cloned  
462 into the expression vector pGEX-6P-3 (GE Healthcare), and subsequently transformed into *E. coli*  
463 Rosetta (DE3) cells. The cells were grown in Luria-Bertani broth at 37 °C to an OD<sub>600</sub> of ~0.6 and

464 induced with 0.5 mM isopropyl- $\beta$ -D-thiogalactopyranoside at 15 °C for 32 h. The cells were  
465 harvested, resuspended in extraction buffer (20 mM Tris-HCl (pH 8.5), 500 mM NaCl and 5 mM  
466 DTT), and disrupted by sonication. The soluble fraction separated by centrifugation was purified  
467 using Glutathione Sepharose 4B resin. On-column cleavage was performed by adding HRV3C  
468 protease, and the eluted D53 was further purified using a Mono Q column and Superdex 200  
469 columns (GE Healthcare). The purified D53 was concentrated to 5  $\mu$ M in buffer containing  
470 20 mM Tris-HCl (pH 7.8), 100 mM NaCl and 5 mM DTT for pull-down assays.

471

472 **Hydrolysis assay.** GR24 and KK094 pre-incubated at 30 °C for 10 min and incubated further at  
473 30 °C for 20 min after the addition of 0.33  $\mu$ M of D14. After adding 5 nmol of CPMF (5-(4-  
474 chlorophenoxy)-3-methylfuran-2(5H)-one) (36) as an internal standard, reaction solutions were  
475 extracted with ethyl acetate three times. Ethyl acetate layers were combined, dried in vacuo, and  
476 then dissolved with 50  $\mu$ L methanol. Each sample was injected at a volume of 5  $\mu$ l into the  
477 reverse-phase HPLC column (CAPCELL CORE C18, 2.1  $\text{\AA}$  ~100 mm, Shiseido, Tokyo, Japan),  
478 coupled to the ESI-MS system (LC-2030C/3D, Shimadzu, Kyoto, Japan). The analytes were  
479 eluted with a linear gradient of 40–90% buffer B (methanol with 0.1% (v/v) formic acid) in buffer  
480 A (MilliQ water with 0.1% (v/v) formic acid) within 9 min, keeping the final condition for 6 min.  
481 The column was operated at 40 °C with a flow rate of 0.2 mL min<sup>-1</sup>. Quantities of GR24 or ABC-  
482 OH were monitored at m/z = 299.10 or 202.06, respectively, and normalized by the amount of  
483 CPMF monitored at m/z = 224.02. The amount of GR24 incubated without D14 was set to 1.  
484 Error bars indicate SE of six seedlings. Student's *t*-test was used to determine the significance of  
485 differences (\**p*<0.05, \*\**p*<0.01).

486

487 **Yoshimulactone G *in vitro* analysis.** In the hydrolysis assay, 0.3  $\mu$ M of YLG was reacted with  
488 0.33  $\mu$ M of recombinant proteins (D14 or ShKAI2d6/ShHTL7) in a reaction buffer (100 mM PBS

489 buffer, pH 7.3) with 0.1% dimethyl sulfoxide (DMSO) at a 300  $\mu$ L volume on a 96-well black  
490 plate (Thermo). The fluorescent intensity was measured by ThermoFisher at the excitation by 485  
491 nm, and detected at a wavelength of 535 nm. The enzymatic reaction was carried out in a 30  $^{\circ}$ C  
492 incubator for 15 min. IC<sub>50</sub> values were calculated using the website:  
493 <http://www.ic50.tk/index.html>.

494

495 **Differential Scanning Fluorometry.** DSF experiments were performed using CFX Connect  
496 Real-Time PCR Detection System (Bio-Rad, CA). Sypro Orange was used as a reporter dye.  
497 After pre-incubation of the reaction mixtures for 5 min and 10 s at 20  $^{\circ}$ C, reaction mixtures were  
498 denatured using a linear 20  $^{\circ}$ C to 95  $^{\circ}$ C gradient at a rate of 0.5  $^{\circ}$ C per 10 s in the absence of light.  
499 Each reaction was carried out at 20- $\mu$ L scale in TN buffer (10 mM Tris-HCl, pH=8.0, 200mM  
500 NaCl) containing 5  $\mu$ M protein, 0.01  $\mu$ L Sypro Orange, and each concentration of experimental  
501 compounds (final DMSO concentration was 10%). The experiments were repeated twice.

502

503 **Pull-down assays.** Pull-down assays of GST-D14 and D53 were performed using a two-step  
504 treatment with experimental compounds. The purified GST-D14 (5  $\mu$ M) was incubated at 4  $^{\circ}$ C for  
505 30 min with Glutathione Sepharose 4B resin, and then washed three times. The glutathione  
506 agarose-bound GST-D14 was incubated with or without 50  $\mu$ M of each experimental compound  
507 at room temperature for 2 h (first step) and then washed three times. The resin-bound GST-D14  
508 was incubated with D53 (5  $\mu$ M) with or without 50  $\mu$ M of each experimental compound at room  
509 temperature for 2 h (second step), then washed three times. Eluted proteins were separated using  
510 SDS-PAGE electrophoresis (10% gel) and detected using CBB staining.

511

512 **Crystallization and structure determination.** 6.0 mg/ml of D14 protein and 10 mM  
513 KK094/KK052/KK073 were mixed together and subjected to crystallization by the sitting drop

514 vapor diffusion method. Crystals of the D14–KK094CM complex were obtained at 20 °C using a  
515 reservoir solution containing 100 mM MES (pH 6.5) and 13% PEG20000. Crystals of the D14–  
516 KK052CM complex were obtained at 20 °C using a reservoir solution containing 100 mM  
517 HEPES (pH 7.5) and 13% PEG20000. Crystals of the D14–KK073CM complex were obtained at  
518 20 °C using a reservoir solution containing 100 mM MES (pH 6.5) and 11% PEG 20000. All  
519 crystals were soaked in the cryo-protectant solution containing 25% (v/v) ethylene glycol and  
520 then flash-cooled with a nitrogen-gas stream at 100 K. All X-ray diffraction data were collected  
521 on the BL-1A beamline at the Photon Factory (Tsukuba, Japan) and processed using the XDS  
522 package (37). Molecular replacement was performed using Phaser (38) in PHENIX (39) with the  
523 apo-D14 structure (PDB ID 3VXK) (19) as the initial model. Coot (40) was used to manually fit  
524 the protein models, and the structure was refined with PHENIX. The geometry of the final model  
525 was analyzed using RAMPAGE (41), and superposition and r.m.s.d. of the structures were  
526 calculated using the CCP4 program LSQKAB (42). All structure Figures were prepared using  
527 PyMOL (43,44). X-ray data and refinement statistics are given in table S1. Coordinates of the X-  
528 ray structures of the D14–KK094CM complex, the D14–KK052CM complex, and the D14–  
529 KK073CM complex have been deposited in the Protein Data Bank, under accession codes 5ZHR,  
530 5ZHS and 5ZHT, respectively.

531

532 **Mass Spectrometry.** For the identification of the KK094CM binding site, the reaction mixtures  
533 (ca. 1.6 mg mL<sup>-1</sup>) of D14 with or without KK094 were dialyzed against 50 mM of NH<sub>4</sub>HCO<sub>3</sub>  
534 solution. Aliquots of the dialyzed samples were analyzed using MALDI-TOF MS on an  
535 ultrafleXtreme TOF/TOF Mass Spectrometer (Bruker Daltonics, Bremen, Germany) in a linear  
536 mode using sinapinic acid as a matrix. After confirmation of KK094 binding to the protein using  
537 MALDI-TOF MS, the dialyzed samples were digested with trypsin (TPCK treated, Worthington  
538 Biochemical Co.) overnight at 37 °C. Aliquots of the digestion mixture were also applied to

539 MALDI-TOF MS in reflector mode using  $\alpha$ -cyano-4-hydroxycinnamic acid as a matrix. For  
540 binding site determination, the digests were further analyzed by nano-liquid chromatography-  
541 tandem mass spectrometry using a Q Exactive mass spectrometer (Thermo Fisher Scientific). The  
542 peptide mixtures (2  $\mu$ L) were separated using a nano ESI spray column (75  $\mu$ m [ID]  $\times$  100 mm  
543 [L], NTCC analytical column C18, 3  $\mu$ m, Nikkyo Technos, Tokyo, Japan) with a linear gradient  
544 of 0–35% buffer B (acetonitrile with 0.1% (v/v) formic acid) in buffer A (MilliQ water with 0.1%  
545 (v/v) formic acid) at a flow rate of 300 nL min<sup>-1</sup> over 10 min (EAST-nLC 1000; Thermo Fisher  
546 Scientific). The mass spectrometer was operated in the positive-ion mode, and the MS and  
547 MS/MS spectra were acquired using a data-dependent TOP10 method. The MS/MS spectra were  
548 drawn using the Qual Browser, Thermo Xcalibur 3.1.66.10.

549

550 **Preparation of KK compounds.** A description is available in the **Supplementary Notes**.

551

## 552 **References and Notes**

- 553 1. M. T. Waters, C. Gutjahr, T. Bennett, D. C. Nelson, Strigolactone Signaling and Evolution.  
554 *Annu Rev Plant Biol* **68**, 291–322 (2017).
- 555 2. H. Nakamura, T. Asami, Target sites for chemical regulation of strigolactone signaling.  
556 *Front Plant Sci* **5**, 623 (2014).
- 557 3. S. Lumba, M. Bunsick, P. McCourt, Chemical genetics and strigolactone perception.  
558 *F1000Res* **6**, 975 (2017).
- 559 4. H. Samejima, A. G. Babiker, H. Takikawa, M. Sasaki, Y. Sugimoto, Practicality of the  
560 suicidal germination approach for controlling *Striga hermonthica*. *Pest Manag Sci* **72**,  
561 2035–2042 (2016).
- 562 5. D. Holbrook-Smith, S. Toh, Y. Tsuchiya, P. McCourt, Small-molecule antagonists of  
563 germination of the parasitic plant *Striga hermonthica*. *Nat Chem Biol* **12**, 724–729 (2016).
- 564 6. O. Mashita, H. Koishihara, K. Fukui, H. Nakamura, T. Asami, Discovery and  
565 identification of 2-methoxy-1-naphthaldehyde as a novel strigolactone-signaling inhibitor.  
566 *Journal of Pesticide Science* **41**, 71–78 (2016).
- 567 7. H. Xiang, R. Yao, T. Quan, F. Wang, L. Chen, X. Du, W. Zhang, H. Deng, D. Xie, T. Luo,  
568 Simple  $\beta$ -lactones are potent irreversible antagonists for strigolactone receptors. *Cell Res*  
569 **27**, 1525–1528 (2017).
- 570 8. M. Yoshimura, A. Sato, K. Kuwata, Y. Inukai, T. Kinoshita, K. Itami, Y. Tsuchiya, S.  
571 Hagihara, Discovery of shoot branching regulator targeting strigolactone receptor  
572 DWARF14. *ACS Central Science* **4**, 230–234 (2018).



- 573 9. C. Hamiaux, R. S. M. Drummond, Z. Luo, H. W. Lee, P. Sharma, B. J. Janssen, N. B.  
574 Perry, W. A. Denny, K. C. Snowden, Inhibition of strigolactone receptors by. *J Biol Chem*  
575 **293**, 6530–6543 (2018).
- 576 10. S. Lumba, D. Holbrook-Smith, P. McCourt, The perception of strigolactones in vascular  
577 plants. *Nat Chem Biol* **13**, 599–606 (2017).
- 578 11. T. Arite, H. Iwata, K. Ohshima, M. Maekawa, M. Nakajima, M. Kojima, H. Sakakibara, J.  
579 Kyozuka, DWARF10, an RMS1/MAX4/DAD1 ortholog, controls lateral bud outgrowth in  
580 rice. *Plant J* **51**, 1019–29 (2007).
- 581 12. C. Hamiaux R. S. Drummond B. J. Janssen S. E. Ledger J. M. Cooney R. D. Newcomb K.  
582 C. Snowden, DAD2 is an  $\alpha/\beta$  hydrolase likely to be involved in the perception of the plant  
583 branching hormone, strigolactone. *Curr Biol* **22**, 2032–2036 (2012).
- 584 13. P. Stirnberg, K. van De Sande, H. M. Leyser, MAX1 and MAX2 control shoot lateral  
585 branching in Arabidopsis. *Development* **129**, 1131–1141 (2002).
- 586 14. S. Ishikawa, M. Maekawa, T. Arite, K. Onishi, I. Takamura, J. Kyozuka, Suppression of  
587 tiller bud activity in tillering dwarf mutants of rice. *Plant Cell Physiol* **46**, 79–86 (2005).
- 588 15. J. P. Stanga, S. M. Smith, W. R. Briggs, D. C. Nelson, SUPPRESSOR OF MORE  
589 AXILLARY GROWTH2 1 controls seed germination and seedling development in  
590 Arabidopsis. *Plant Physiol* **163**, 318–330 (2013).
- 591 16. F. Zhou, Q. Lin, L. Zhu, Y. Ren, K. Zhou, N. Shabek, F. Wu, H. Mao, W. Dong, L. Gan,  
592 W. Ma, H. Gao, J. Chen, C. Yang, D. Wang, J. Tan, X. Zhang, X. Guo, J. Wang, L. Jiang,  
593 X. Liu, W. Chen, J. Chu, C. Yan, K. Ueno, S. Ito, T. Asami, Z. Cheng, C. Lei, H. Zhai, C.  
594 Wu, H. Wang, N. Zheng, J. Wan, D14-SCF(D3)-dependent degradation of D53 regulates  
595 strigolactone signalling. *Nature* **504**, 406–410 (2013).
- 596 17. L. Jiang, X. Liu, G. Xiong, H. Liu, F. Chen, L. Wang, X. Meng, G. Liu, H. Yu, Y. Yuan,  
597 W. Yi, L. Zhao, H. Ma, Y. He, Z. Wu, K. Melcher, Q. Qian, H. E. Xu, Y. Wang, J. Li,  
598 DWARF 53 acts as a repressor of strigolactone signalling in rice. *Nature* **504**, 401–415  
599 (2013).
- 600 18. H. Ma, J. Duan, J. Ke, Y. He, X. Gu, T. H. Xu, H. Yu, Y. Wang, J. S. Brunzelle, Y. Jiang,  
601 S. B. Rothbart, H. E. Xu, J. Li, K. Melcher, A D53 repression motif induces  
602 oligomerization of TOPLESS corepressors and promotes assembly of a corepressor-  
603 nucleosome complex. *Sci Adv* **3**, e1601217 (2017).
- 604 19. H. Nakamura, Y. L. Xue, T. Miyakawa, F. Hou, H. M. Qin, K. Fukui, X. Shi, E. Ito, S. Ito,  
605 S. H. Park, Y. Miyauchi, A. Asano, N. Totsuka, T. Ueda, M. Tanokura, T. Asami,  
606 Molecular mechanism of strigolactone perception by DWARF14. *Nat Commun* **4**, 2613  
607 (2013).
- 608 20. A. de Saint Germain, G. Clavé, M. A. Badet-Denisot, J. P. Pillot, D. Cornu, J. P. Le Caer,  
609 M. Burger, F. Pelissier, P. Retailleau, C. Turnbull, S. Bonhomme, J. Chory, C. Rameau, F.  
610 D. Boyer, An histidine covalent receptor and butenolide complex mediates strigolactone  
611 perception. *Nat Chem Biol* **12**, 787–794 (2016).
- 612 21. R. Yao, Z. Ming, L. Yan, S. Li, F. Wang, S. Ma, C. Yu, M. Yang, L. Chen, Y. Li, C. Yan,  
613 D. Miao, Z. Sun, J. Yan, Y. Sun, L. Wang, J. Chu, S. Fan, W. He, H. Deng, F. Nan, J. Li,  
614 Z. Rao, Z. Lou, D. Xie, DWARF14 is a non-canonical hormone receptor for strigolactone.  
615 *Nature* **536**, 469–473 (2016).
- 616 22. D. A. Shannon, E. Weerapana, Covalent protein modification: the current landscape of  
617 residue-specific electrophiles. *Curr Opin Chem Biol* **24**, 18–26 (2015).
- 618 23. J. P. Alexander, B. F. Cravatt, The putative endocannabinoid transport blocker  
619 LY2183240 is a potent inhibitor of FAAH and several other brain serine hydrolases. *J Am*  
620 *Chem Soc* **128**, 9699–9704 (2006).
- 621 24. D. B. Lowe, S. Magnuson, N. Qi, A. M. Campbell, J. Cook, Z. Hong, M. Wang, M.  
622 Rodriguez, F. Achebe, H. Kluender, W. C. Wong, W. H. Bullock, A. I. Salhanick, T.



- 623 Witman-Jones, M. E. Bowling, C. Keiper, K. B. Clairmont, *In vitro* SAR of (5-(2H)-  
624 isoxazolonyl) ureas, potent inhibitors of hormone-sensitive lipase. *Bioorg Med Chem Lett*  
625 **14**, 3155–3159 (2004).
- 626 25. S. Ebdrup, L. G. Sørensen, O. H. Olsen, P. Jacobsen, Synthesis and structure-activity  
627 relationship for a novel class of potent and selective carbamoyl-triazole based inhibitors of  
628 hormone sensitive lipase. *J Med Chem* **47**, 400–410 (2004).
- 629 26. A. Adibekian, B. R. Martin, C. Wang, K. L. Hsu, D. A. Bachovchin, S. Niessen, H.  
630 Hoover, B. F. Cravatt, Click-generated triazole ureas as ultrapotent *in vivo*-active serine  
631 hydrolase inhibitors. *Nat Chem Biol* **7**, 469–478 (2011).
- 632 27. M. Umehara, A. Hanada, S. Yoshida, K. Akiyama, T. Arite, N. Takeda-Kamiya, H.  
633 Magome, Y. Kamiya, K. Shirasu, K. Yoneyama, J. Kyojuka, S. Yamaguchi, Inhibition of  
634 shoot branching by new terpenoid plant hormones. *Nature* **455**, 195–200 (2008).
- 635 28. S. Toh, D. Holbrook-Smith, P. J. Stogios, O. Onopriyenko, S. Lumba, Y. Tsuchiya, A.  
636 Savchenko, P. McCourt, Structure-function analysis identifies highly sensitive  
637 strigolactone receptors in *Striga*. *Science* **350**, 203–207 (2015).
- 638 29. Y. Tsuchiya, M. Yoshimura, Y. Sato, K. Kuwata, S. Toh, D. Holbrook-Smith, H. Zhang, P.  
639 McCourt, K. Itami, T. Kinoshita, S. Hagihara, PARASITIC PLANTS. Probing  
640 strigolactone receptors in *Striga hermonthica* with fluorescence. *Science* **349**, 864–868  
641 (2015).
- 642 30. M. Nardini, B. W. Dijkstra, Alpha/beta hydrolase fold enzymes: the family keeps growing.  
643 *Curr Opin Struct Biol* **9**, 732–737 (1999).
- 644 31. M. Kagiya, Y. Hirano, T. Mori, S. Y. Kim, J. Kyojuka, Y. Seto, S. Yamaguchi, T.  
645 Hakoshima, Structures of D14 and D14L in the strigolactone and karrikin signaling  
646 pathways. *Genes Cells* **18**, 147–160 (2013).
- 647 32. Y. Guo, Z. Zheng, J. J. La Clair, J. Chory, J. P. Noel, Smoke-derived karrikin perception  
648 by the  $\alpha/\beta$ -hydrolase KAI2 from Arabidopsis. *Proc Natl Acad Sci U S A* **110**, 8284–8289  
649 (2013).
- 650 33. Y. Xu, T. Miyakawa, H. Nakamura, A. Nakamura, Y. Imamura, T. Asami, Structural basis  
651 of unique ligand specificity of KAI2-like protein from parasitic weed *Striga hermonthica*.  
652 *Sci Rep* **6**, 31386 (2016).
- 653 34. K. Kamachi, T. Yamaya, T. Mae, K. Ojima, A Role for Glutamine Synthetase in the  
654 Remobilization of Leaf Nitrogen during Natural Senescence in Rice Leaves. *Plant Physiol*  
655 **96**, 411–417 (1991).
- 656 35. Y. Sugimoto, T. Ueyama, Production of (+)-5-deoxystrigol by *Lotus japonicus* root  
657 culture. *Phytochemistry* **69**, 212–217 (2008).
- 658 36. K. Fukui, S. Ito, K. Ueno, S. Yamaguchi, J. Kyojuka, T. Asami, New branching inhibitors  
659 and their potential as strigolactone mimics in rice. *Bioorg Med Chem Lett* **21**, 4905–4908  
660 (2011).
- 661 37. W. Kabsch, XDS. *Acta Crystallogr D Biol Crystallogr* **66**, 125–132 (2010).
- 662 38. McCoy, A.J. et al. Phaser crystallographic software. *J Appl Crystallogr* **40**, 658–674  
663 (2007).
- 664 39. P. D. Adams, P. V. Afonine, G. Bunkóczi, V. B. Chen, I. W. Davis, N. Echols, J. J. Headd,  
665 L. W. Hung, G. J. Kapral, R. W. Grosse-Kunstleve, A. J. McCoy, N. W. Moriarty, R.  
666 Oeffner, R. J. Read, D. C. Richardson, J. S. Richardson, T. C. Terwilliger, P. H. Zwart,  
667 PHENIX: a comprehensive Python-based system for macromolecular structure solution.  
668 *Acta Crystallogr D Biol Crystallogr* **66**, 213–221 (2010).
- 669 40. P. Emsley, K. Cowtan, Coot: model-building tools for molecular graphics. *Acta*  
670 *Crystallogr D Biol Crystallogr* **60**, 2126–2132 (2004).

- 671 41. P. D. Adams, P. V. Afonine, G. Bunkóczy, V. B. Chen, I. W. Davis, N. Echols, J. J. Headd,  
672 L. W. Hung, G. J. Kapral, R. W. Grosse-Kunstleve, A. J. McCoy, N. W. Moriarty, R.  
673 Oeffner, R. J. Read, D. C. Richardson, J. S. Richardson, T. C. Terwilliger, P. H. Zwart,  
674 Structure validation by Calpha geometry: phi,psi and Cbeta deviation. *Proteins* **50**, 437–  
675 450 (2003).
- 676 42. W. Kabsch, Solution for best rotation to relate 2 sets of vectors. *Acta Crystallographica*  
677 *Section a* **32**, 922–923 (1976).
- 678 43. W. DeLano, *The PyMOL Molecular Graphics System, version 1.8.6.0*, (Schroedinger,  
679 LLC, New York, 2012).
- 680 44. D. Eisenberg, E. Schwarz, M. Komaromy, R. Wall, Analysis of membrane and surface  
681 protein sequences with the hydrophobic moment plot. *J Mol Biol* **179**, 125–142 (1984).

682

683

## 684 **Acknowledgments**

685 The authors thank Prof. A.E. Babiker (Sudan University of Science and Technology) for  
686 providing the seeds of *S. hermontica* harvested in Sudan and thank Prof. J. Kyojuka (Tohoku  
687 University) for kindly providing rice SL mutants. **Funding:** This work was supported in part by a  
688 grant from the Core Research for Evolutional Science and Technology (CREST) Program of the  
689 Japan Science and Technology Agency (JST) (to T.A.); the Program for the Promotion of Basic  
690 and Applied Researches for Innovation in Bio-oriented Industry (BRAIN) (to T.A.); a JSPS  
691 Grant-in-Aid for Scientific Research (grant number 26520303 to H.N., 16H06736, 17J04676 and  
692 17K15258 to K.H.; a JSPS Grant-in-Aid for Scientific Research on Priority Areas (grant number  
693 18H04608 to H. N.). The synchrotron-radiation experiments were performed on BL-1A  
694 beamlines at the Photon Factory with the support from the Platform Project for Supporting Drug  
695 Discovery and Life Science Research (Basis for Supporting Innovative Drug Discovery and Life  
696 Science Research (BINDS)) from AMED under Grant Number JP17am0101071. **Author**  
697 **contributions:** H.N., M.T., and T.A. designed research; H.N. and W.H. performed the Y2H  
698 assay, inhibitor screening and *in planta* assays and the *in vitro* enzymatic assays. K.H., T.M., and  
699 Y.X. performed the crystal structure analysis and pull-down assay; K.J. performed the DSF assay;  
700 N.D. performed the MALDI-TOF-MS and LC-MS/MS analyses; K.K. synthesized chemicals;

701 H.N., K.H., and T.A. wrote the paper; all authors read and approved the manuscript. **Competing**  
702 **interests:** The authors declare no competing financial interests. **Data and materials availability:**  
703 The structure coordinates and structural factors are deposited in the Protein Data Bank with  
704 accession numbers of 5ZHR (D14–KK094CM complex), 5ZHS (D14–KK052CM complex) and  
705 5ZHT (D14–KK073CM complex).

706  
707

708

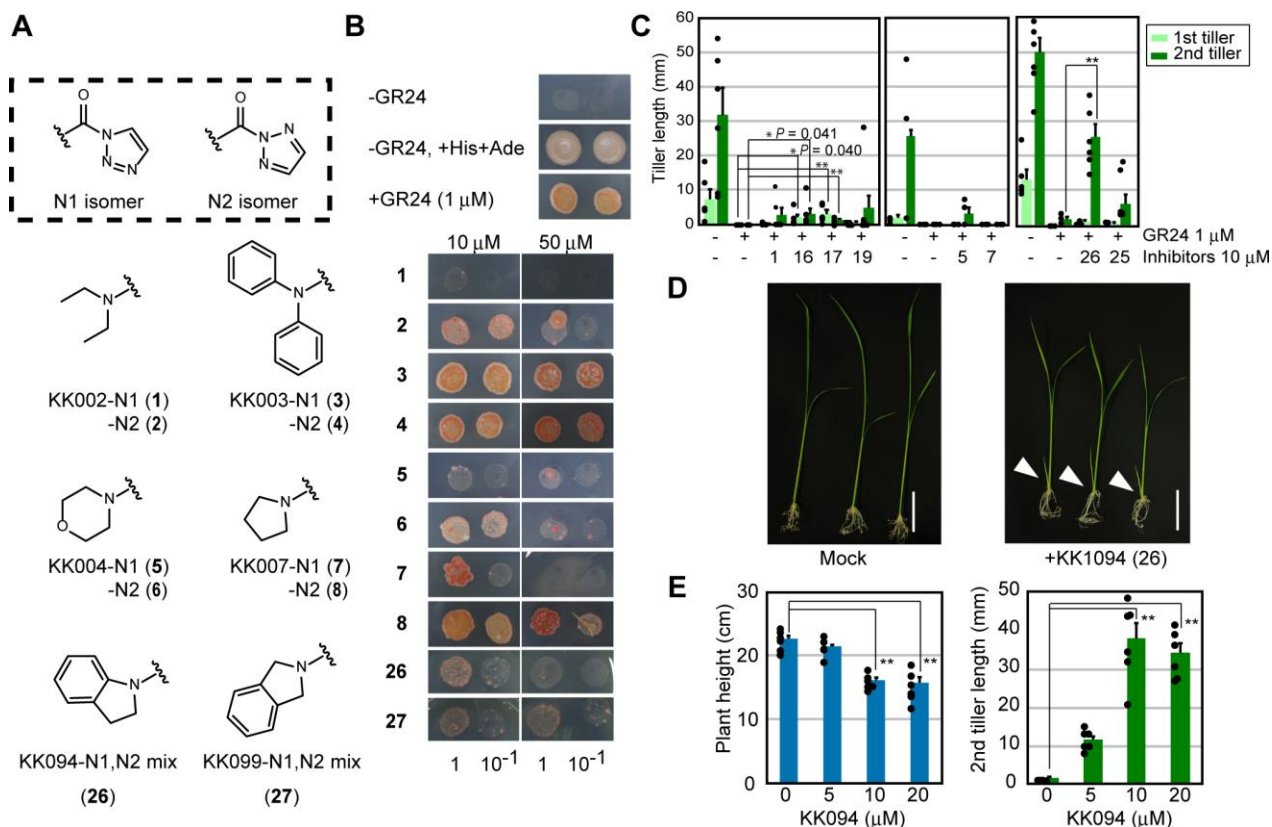

709

710

711

712

713

714

715

716

717

718

719

720

721

722

723

**Fig. 1. Inhibition of the SL-dependent D14-D53 interactions and rice tillering.** (A) Structures of 1,2,3-triazole ureas. (B) Growth of AH109 yeast transformed with pGBK-D14 and pGAD-D53 were grown for 2 days in the liquid SD+His Ade media for 2 days at 30 °C and 5  $\mu$ L of each yeast culture was spotted on SD-His Ade plates containing 1  $\mu$ M GR24 with 10  $\mu$ M or 50  $\mu$ M concentrations of the 1,2,3-triazole ureas. The bottom numbers indicate dilutions of the yeast culture. (C) Inhibition of the effect of SL on rice tillering by 1,2,3-triazole ureas. Seven-day-old *d17-1* mutant rice seedlings were treated with experimental compounds and grown for a further 7 days, and the length of the first/second tillers were measured. (D) Stimulation of rice tillering by KK094. Eight-day-old wild-type rice (cv Nipponbare) seedlings were treated with/without 10  $\mu$ M KK094 and grown for a further six days. Arrow heads indicate out growing tillers. Scale bars = 3 cm. (E) Concentration-dependent effects of KK094 on plant growth and rice tillering. Eight-day-old wild-type rice (cv Nipponbare) seedlings were treated with/without KK094 and grown for a further six days; and the length of first/second tillers were measured. Error bars indicate SE of six

724 seedlings. Student's *t*-test was used to determine the significance of differences ( $*p<0.05$ ,  
725  $**p<0.01$ ).

726

727

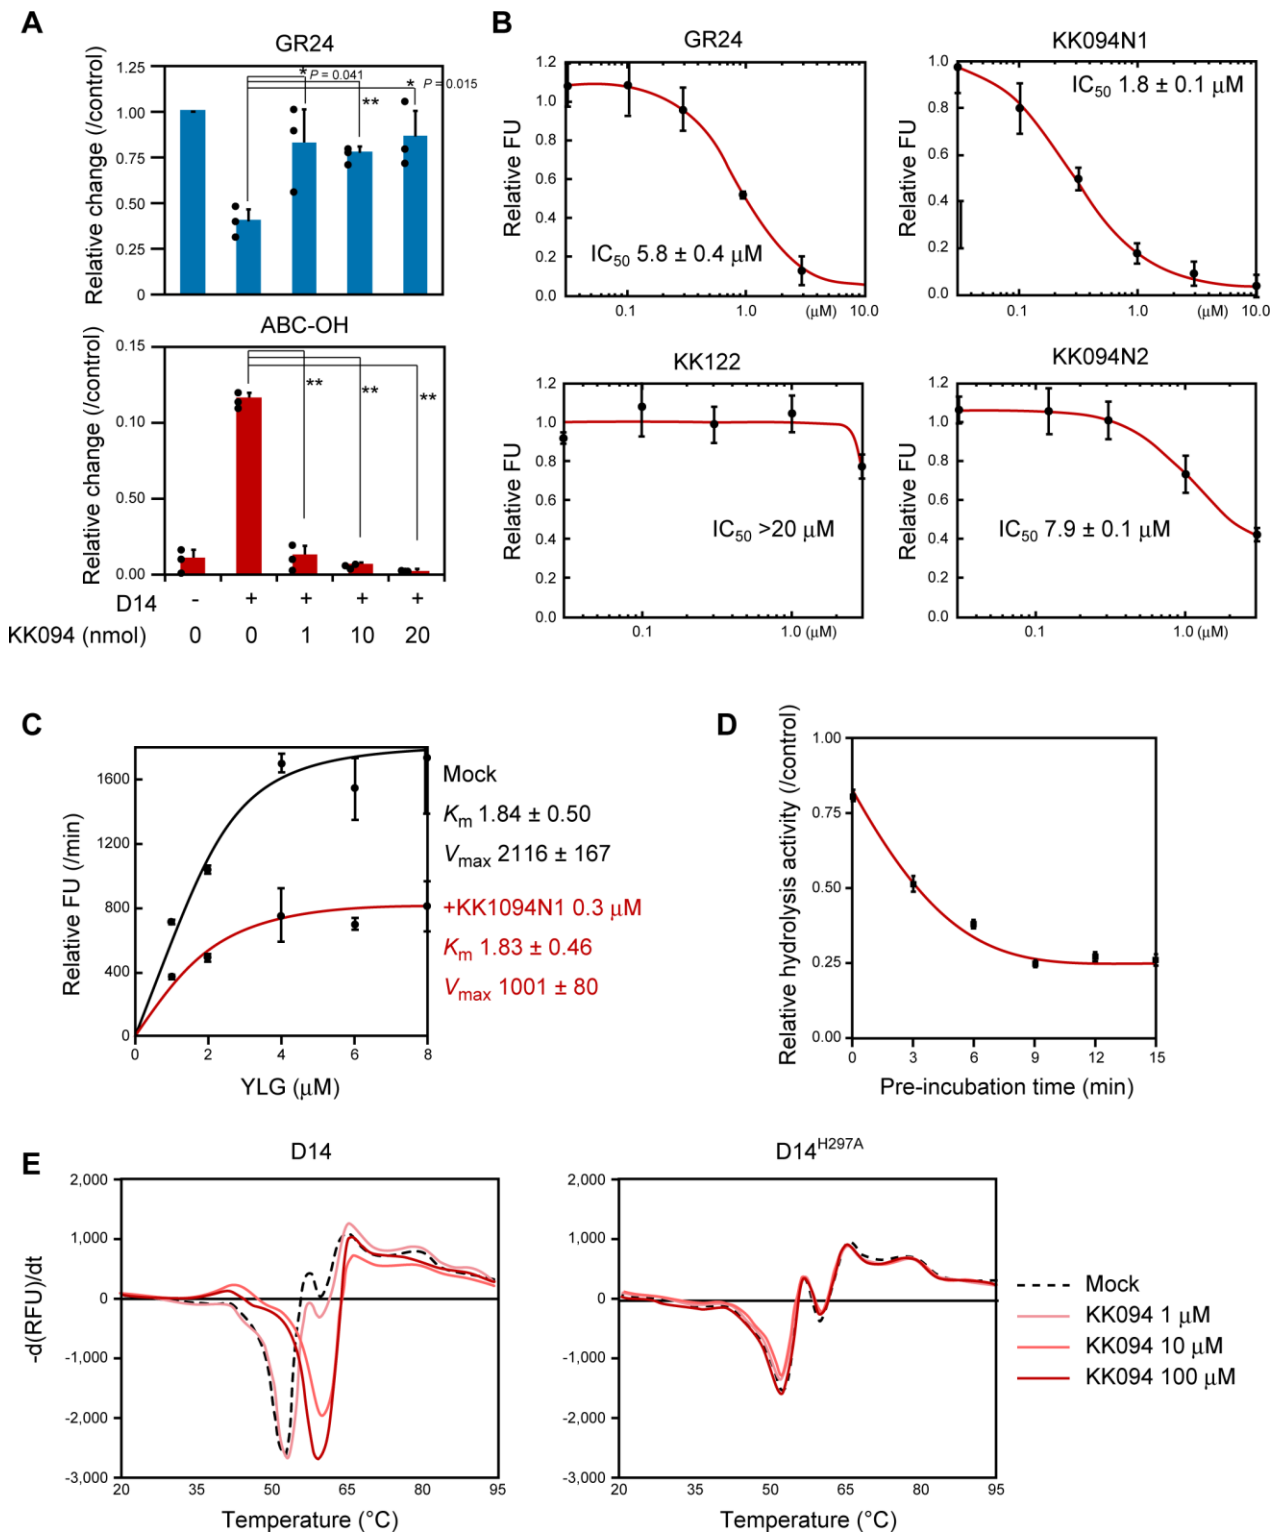

728

729

730

**Fig. 2. Inhibition of D14 by KK094.** (A) KK094 concentration-dependently inhibits hydrolysis

731

of GR24 by D14. GR24 and KK094 were pre-incubated at 30° C for 10 min and incubated further

732

at 30° C for 20 min after addition of 0.33 μM of D14. Then the quantities of GR24 or ABC-OH

733 were monitored by LC-MS. The amount of GR24 incubated without D14 was set to 1. Error bars  
734 indicate SE of three sample replicates. Student's *t*-test was used to determine the significance of  
735 differences (\* $p < 0.05$ , \*\* $p < 0.01$ ). **(B)** Competitive inhibition of D14-mediated Yoshimulactone G  
736 (YLG) hydrolysis. A concentration of 0.3  $\mu\text{M}$  of YLG was reacted with 0.33  $\mu\text{M}$  of D14 and the  
737 fluorescent intensity was measured at an excitation wavelength of 485 nm and detected at 535 nm.  
738 The fluorescent values relative to the hydrolysis without inhibitor was shown. FU = fluorescence  
739 unit. Error bars indicate SE of three sample replicates.  $\text{IC}_{50}$  values were calculated using the  
740 website <http://www.ic50.tk/index.html>. **(C)** KK094 alters the  $V_{\text{max}}$  value, not the  $K_{\text{m}}$  value, of  
741 YLG hydrolyzation by D14. Error bars indicate SE of three sample replicates. 0.3  $\mu\text{M}$  of KK094-  
742 N1 reduced the  $V_{\text{max}}$  value by half but did not change the  $K_{\text{m}}$  value. **(D)** Preincubation with  
743 KK094-N1 reduced hydrolysis activity of D14. Pre-incubation of 0.33  $\mu\text{M}$  of D14 with 0.3  $\mu\text{M}$  of  
744 KK094-N1 for the indicated time and incubated for another 10 min after the addition of 0.3  $\mu\text{M}$  of  
745 YLG, and the fluorescent intensity was measured. Error bars indicate SE of three sample  
746 replicates. **(E)** Melting temperature curves for D14 and the D14<sup>H297A</sup> mutant protein at varying  
747 concentrations of KK094 as monitored by differential scanning fluorometry. Each line represents  
748 the average protein melt curve for three sample replicates measured in parallel.

749



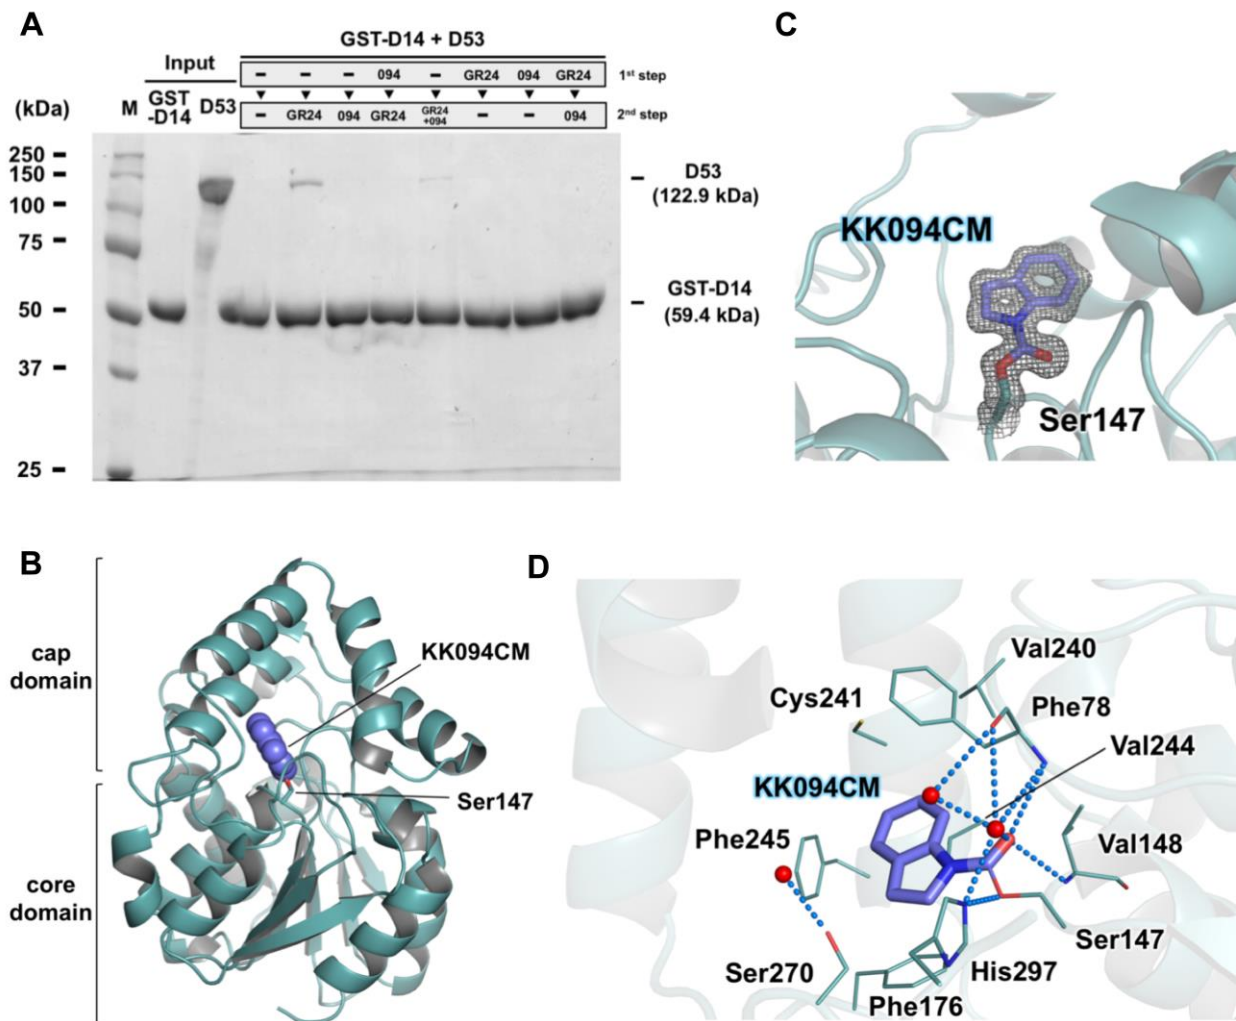

750

751 **Fig. 3. *in-vitro* pull-down assays of GST–D14 and D53 proteins, and the crystal structure of**

752 **D14 in complex with KK094CM.** (A) The *in-vitro* pull-down assays were performed using a

753 two-step treatment with GR24/KK094. The interaction of D14 with D53 was detected by SDS-

754 PAGE and Coomassie Brilliant Blue (CBB) staining. (B) Overall structure of KK094CM-bound

755 D14. The covalently bound KK094CM is depicted in purple with van der Waals surfaces, and the

756 catalytic S147 residue is shown as a stick model. (C) The electron density map of the covalently

757 bound KK094CM to S147. KK094CM is shown as a stick model (purple), along with the  $2F_o - F_c$

758 map contoured at  $1.0\sigma$  (gray). (D) Binding site of KK094CM in the catalytic pocket of D14. The

759 residues involved in the interaction with KK094CM ( $< 4.5 \text{ \AA}$ ) are represented by a line model.

760 Water molecules are shown as red balls, and the blue broken line indicates a hydrogen bond.



762

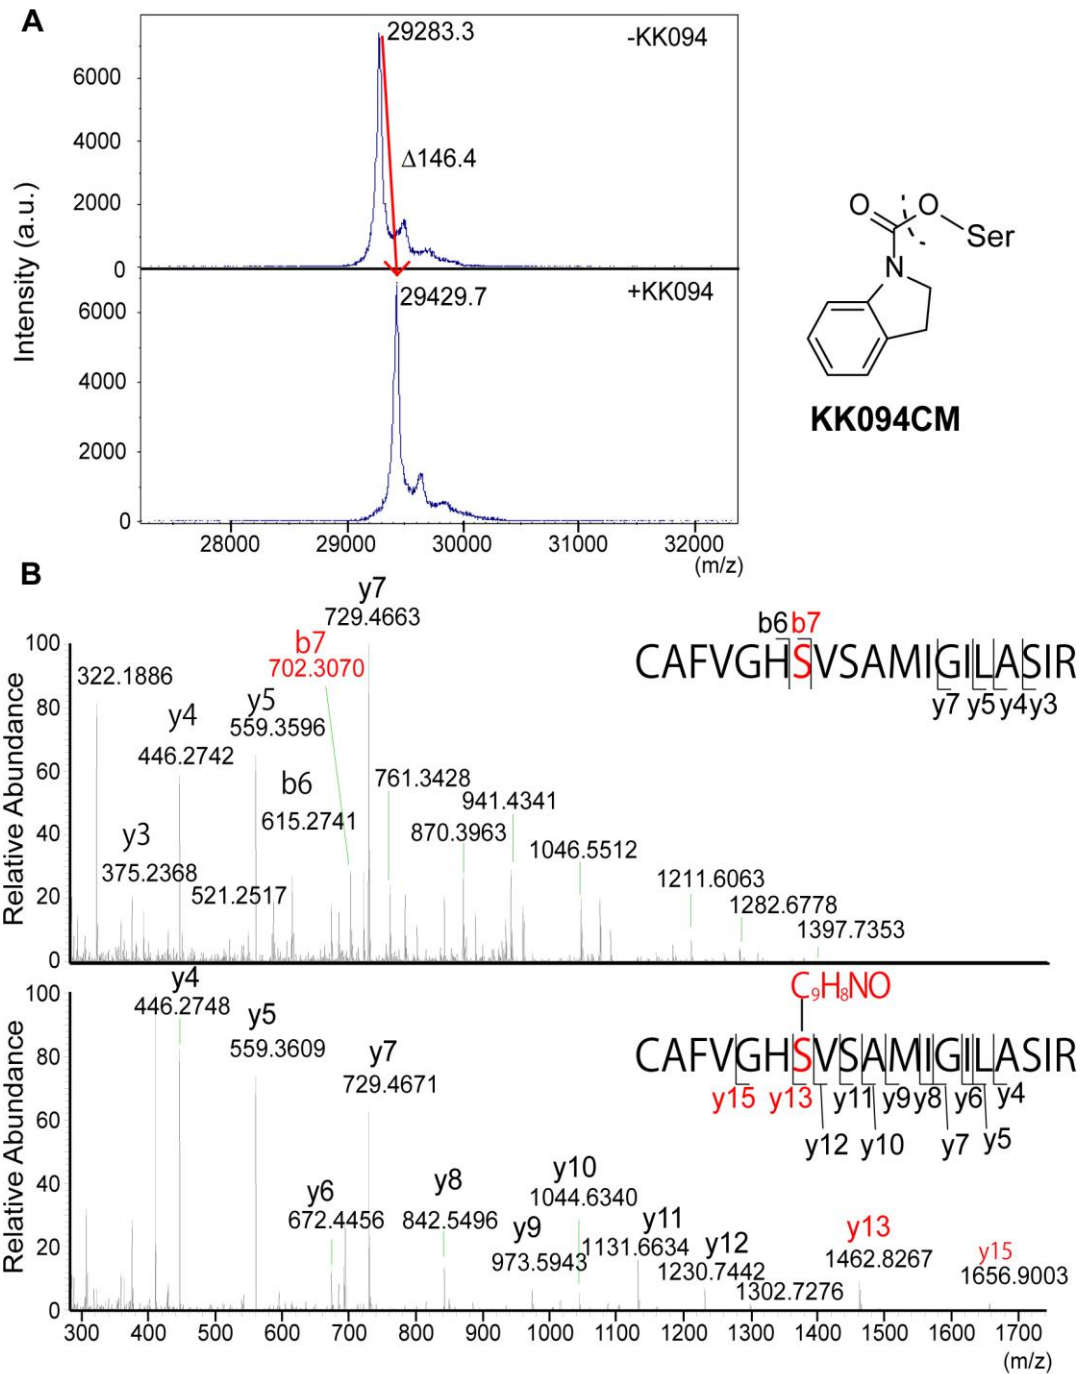

763

764

765

766

767

768

**Fig. 4. Covalent binding of KK094CM to S147** (A) D14 was incubated without (upper panel) or with (lower panel) GR24 and analyzed by MALDI-TOF MS. (B) The reaction mixture of D14 and GR24 without or with KK094 (-KK094/+KK094, respectively) was dialyzed against a 50 mM NH<sub>4</sub>HCO<sub>3</sub> solution. The dialyzed sample was digested with trypsin and analyzed using LC-

769 MS/MS. MS/MS spectra of peptides corresponding to peptides 141–159  
770 ( $^{141}\text{CAFVGHSVSAMIGILASIR}^{159}$ ;  $m/z$  1932.446 for -KK094 (upper),  $m/z$  2077.454 for +KK094  
771 (lower)) are shown. Peaks of the ions y13 and y15 indicate that the Ser-residue (red letter) is  
772 covalently modified by KK094CM.  
773

774

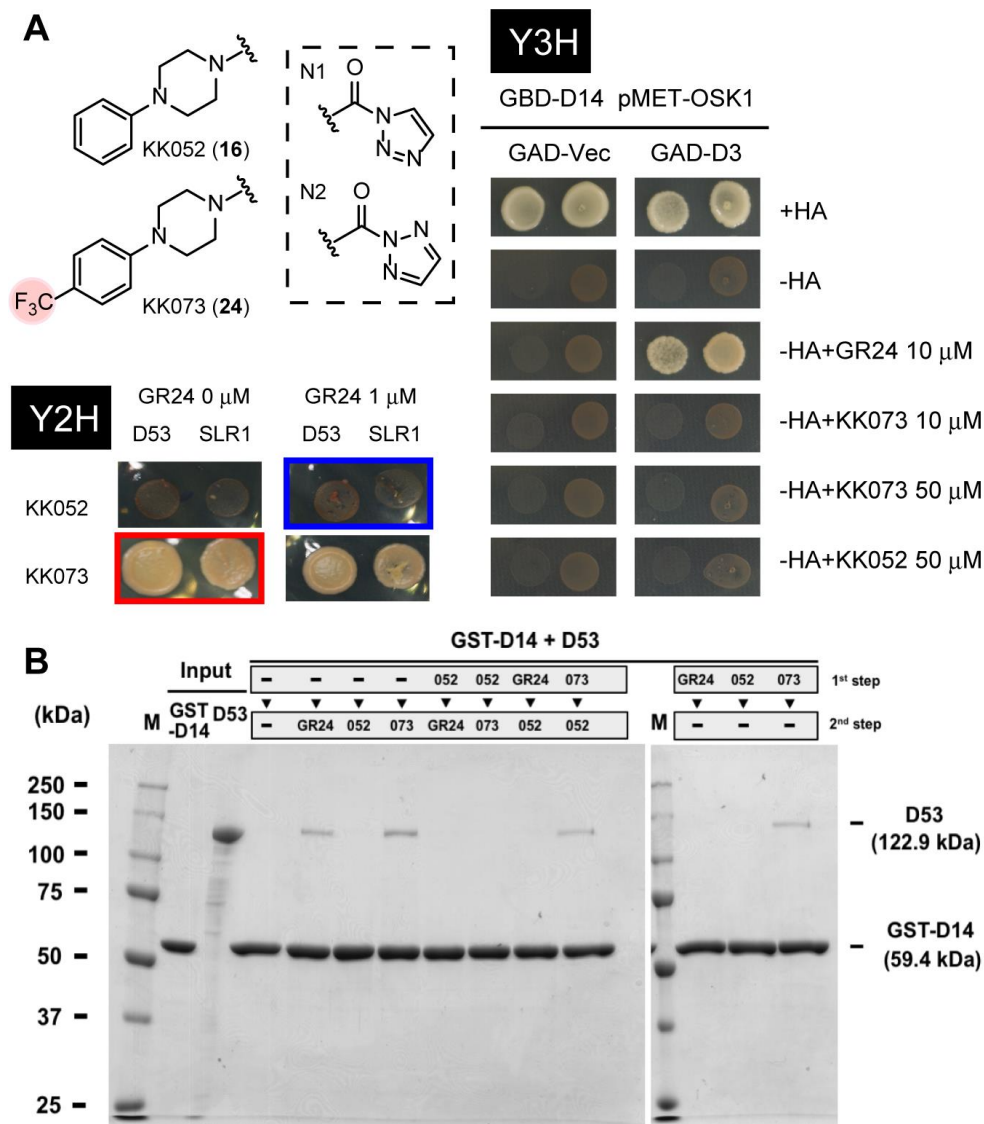

775

776 **Fig. 5. Agonistic effects of KK073 on D14–D53/D14–D3 interactions.** (A) Structures of KK052  
 777 and KK073 are shown on the right. Y2H: Growth of AH109/pGBK-D14–pGAD-D53 or  
 778 AH109/pGBK-D14–pGAD-SLR1 on SD-His Ade plates containing experimental compounds for  
 779 4 days at 30°C. KK073 showed an agonistic effect (in red squares) and KK052 showed  
 780 antagonism (in blue squares). Y3H: Growth of AH109/ pBridge-BD:D14-M:OSK1–pGAD-D3 or  
 781 AH109/ pBridge-BD:D14-M:OSK1–pGADT7 on SD-His Ade Met plates containing  
 782 experimental compounds for 4 days at 30°C. (B) *In-vitro* pull-down assays of GST–D14 and D53

783 using a two-step treatment with GR24/KK052/KK073. The interaction of D14 with D53 was  
784 detected by SDS-PAGE and CBB staining.

785

786

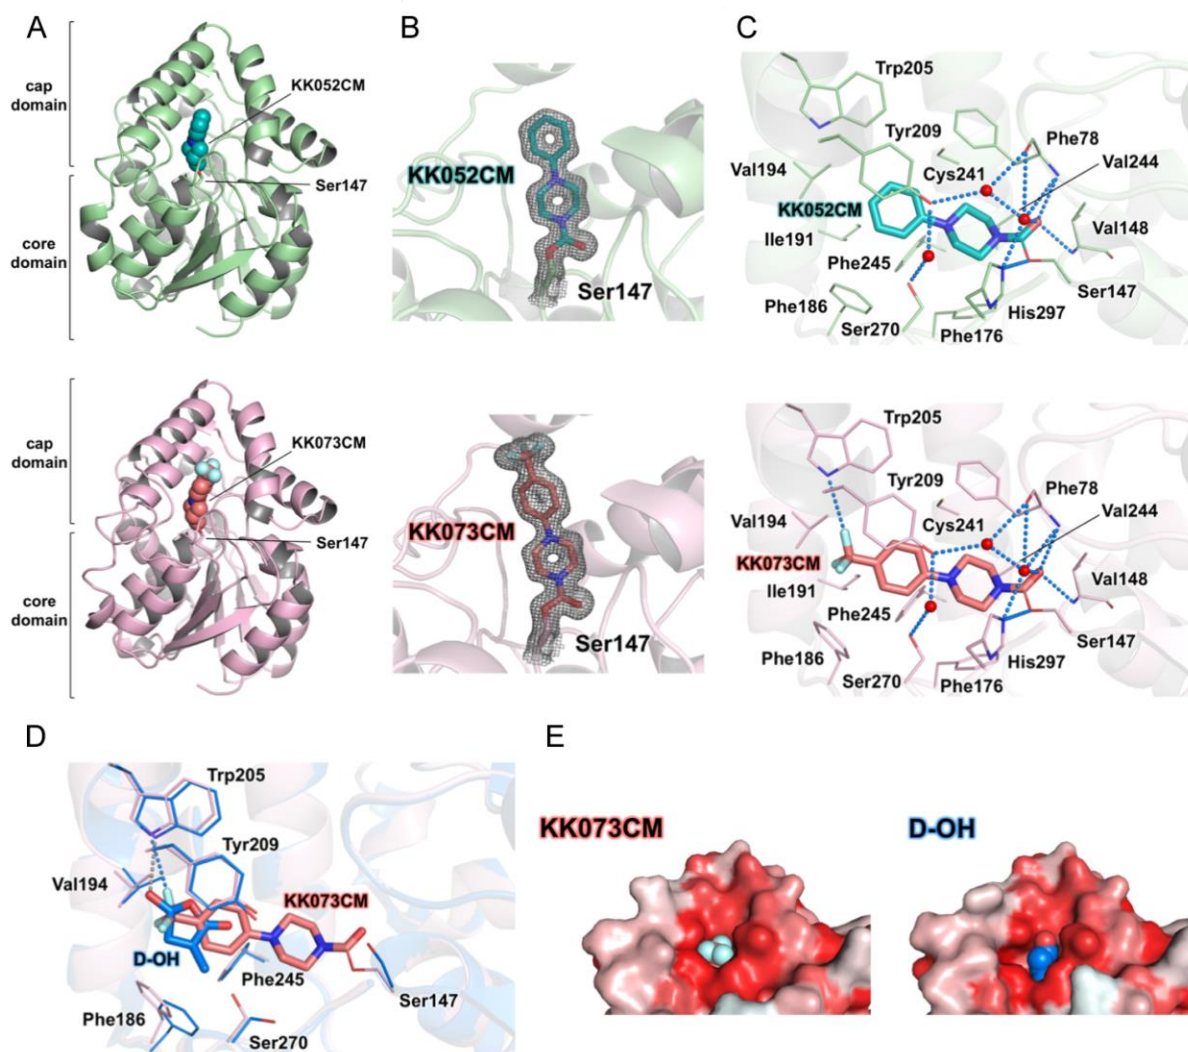

787  
788

789 **Fig. 6. KK052CM and KK073CM covalently binds to D14.** (A–C) Crystal structures of D14 in  
790 complex with KK052CM or KK073CM. Overall structures (A), electron density maps (B) and  
791 binding sites (C) of KK052CM (green) and KK073CM (pink). The orientation and structural  
792 representation are the same as in Fig. 3A–D. (D) Comparison of the ligand binding sites of  
793 KK073CM-bound D14 (pink) and D-OH-bound D14 (PDB ID 3WIO) (blue). The residues  
794 involved in the interaction with the trifluoromethyl group of KK073 and D-OH are represented by  
795 line models, and the broken lines indicate hydrogen bonds. The orientation is the same as in (C).  
796 The r.m.s.d. for the C $\alpha$  atoms was 0.38 Å. (E) The hydrophobicity of the surface residues in  
797 KK073CM-bound D14 and D-OH-bound D14 (PDB ID 3WIO). Hydrophobic residues are shown

798 in red, whereas hydrophilic sites are shown in white. KK073CM and D-OH are depicted in van  
799 der Waals surfaces. The trifluoromethyl group of KK073 protruded out of the pocket and  
800 generated a polar patch in the hydrophobic surface of D14.

801

802

803

804

## 805 **Supplementary Materials**

806 fig. S1. Inhibition of the SL-dependent D14–D53 interaction by KK007- and KK004-derivatives.

807 fig. S2. Effects of KK compounds on plant growth.

808 fig. S3. Inhibition of the SL-dependent D14–D53 interactions and rice tillering by KK122.

809 fig. S4. Inhibition of the SL-dependent D14–D53 interactions and rice tillering by KK094-  
810 derivatives.

811 fig. S5. Inhibition of *Striga* seed germination and a *Striga* SL receptor, ShHTL7, by KK094.

812 fig. S6. LC-MS analyses of GR24- or KK094N1-hydrolysis by D14.

813 fig. S7. Structural comparisons.

814 fig. S8. MALDI-TOF-MS analysis of trypsin-treated D14 with or without KK094.

815 fig. S9. Inhibition or stimulation of the SL-dependent D14–SLR1/D14–D53 interaction by  
816 KK052-derivatives.

817 fig. S10. KK073 showed antagonism of the suppression of rice tillering induced by strigolactone.

818 table S1. X-ray data collection and refinement statistics.

819 table S2. Deduced peptide mass values of D14 fragments digested with trypsin.

820 table S3. Theoretical mass values of peptide 141–159 ( $^{141}\text{CAFVGHVSAMIGILASIR}^{159}$ ).

821 **Supplementary Notes**

822



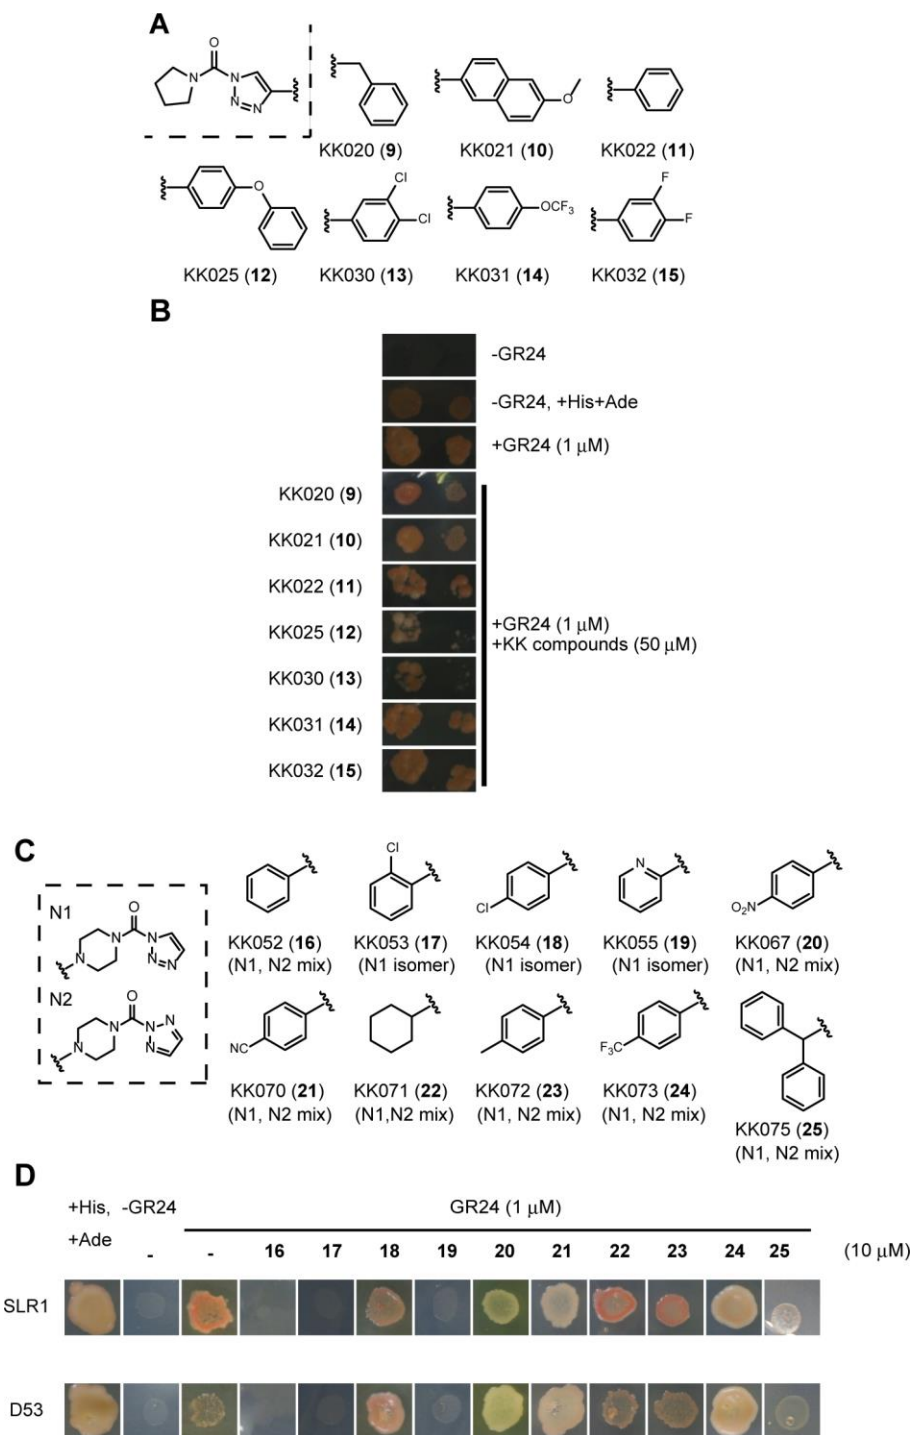

823

824 **fig. S1. Inhibition of the SL-dependent D14–D53 interaction by KK007- and KK004-**  
 825 **derivatives.** (A) Structures of KK007N1-derivatives. Various substituents were introduced onto  
 826 the 4-position of the 1,2,3-triazole group of KK007N1. (B) Growth of AH109/pGBK-D14–  
 827 pGAD-D53 on SD-His Ade plates containing 1 μM GR24 with 10 μM or 50 μM 1,2,3-triazole  
 828 ureas for 4 days at 30 °C. (C) Structures of KK004-derivatives. The morpholine structure derived  
 829 from KK004 (mixture of N1- and N2-compounds; shown in the dashed box) was modified by the  
 830 addition of various substituents. (D) Growth of AH109/pGBK-D14–pGAD-D53 on an SD-His  
 831 Ade plate containing 1 μM GR24 with 10 μM or 10 μM of 1,2,3-triazole ureas for 4 days at 30 °C.

832

833



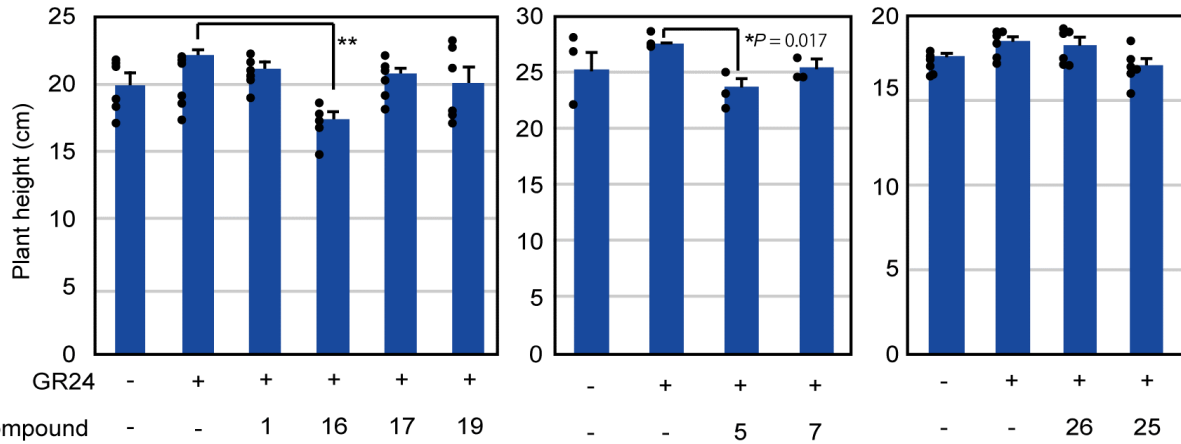

**fig. S2. Effects of KK compounds on plant growth.** Seven-day-old *d17-1* mutant rice seedlings were treated with experimental compounds, grown for a further 7 days, then plant heights were measured. Error bars indicate SE of six seedlings. Unpaired tw-Student's *t*-test was used to determine the significance of differences (\* $p < 0.05$ , \*\* $p < 0.01$ ).

850  
851

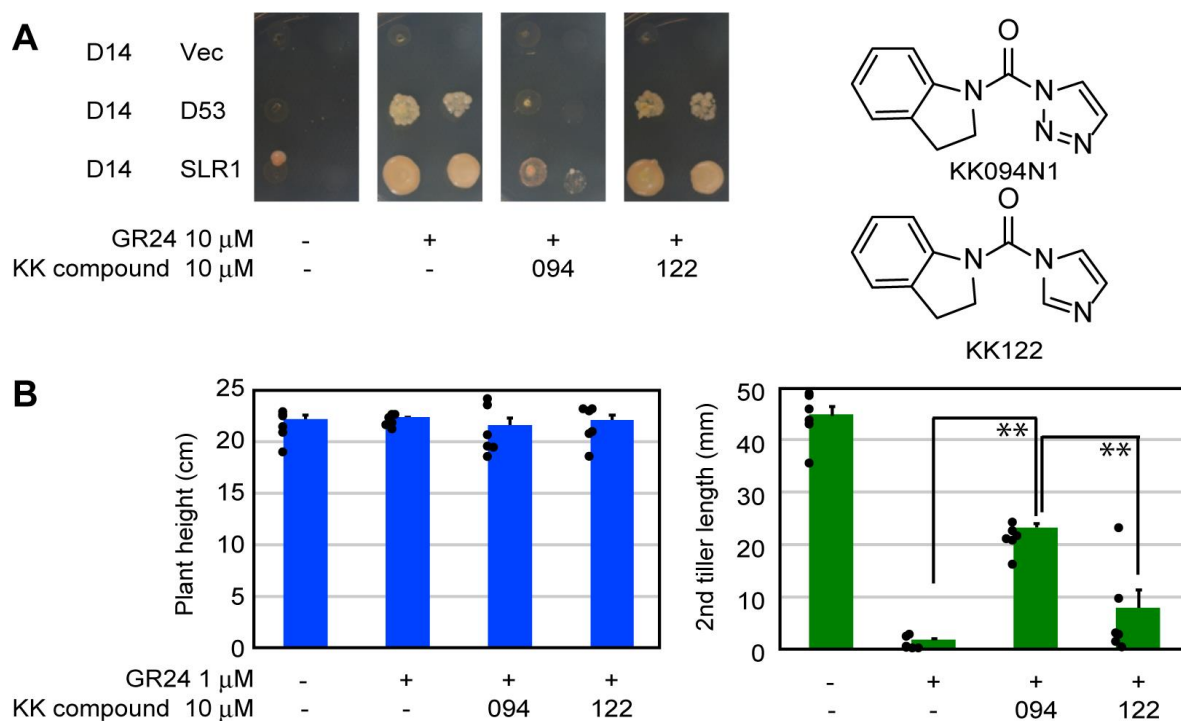

852

853

854

855

856

857

858

859

860

861

862

863

864

**fig. S3. Inhibition of the SL-dependent D14–D53 interactions and rice tillering by KK122.**

(A) Growth of AH109 yeast transformed with pGBK-D14 and pGAD-T7/pGAD-D53/pGAD-SLR1 on an SD-His Ade plate containing 10  $\mu$ M GR24 with 10  $\mu$ M KK094N1/KK122 for 4 days at 30 °C. (B) Inhibition of the effect of SL on rice tillering by KK122. Seven-day-old *d17-1* mutant rice seedlings were treated with experimental compounds and grown for a further 7 days, and plant heights and the length of the first/second tillers were measured. Error bars indicate SE of six seedlings. Unpaired two-tailed Student's *t*-test was used to determine the significance of differences (\*\* $p < 0.01$ ).

865

866

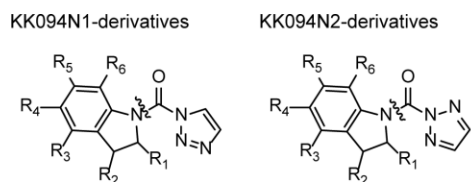

|                                                                 |            | R <sub>1</sub> =<br>CH <sub>3</sub> | R <sub>2</sub> =<br>CH <sub>3</sub> | R <sub>3</sub> =<br>NO <sub>2</sub> Cl CH <sub>3</sub> |    |    | R <sub>4</sub> =<br>NO <sub>2</sub> Cl CH <sub>3</sub> |    |    | R <sub>5</sub> =<br>NO <sub>2</sub> Cl CH <sub>3</sub> |    |    | R <sub>6</sub> =<br>NO <sub>2</sub> Cl |    |
|-----------------------------------------------------------------|------------|-------------------------------------|-------------------------------------|--------------------------------------------------------|----|----|--------------------------------------------------------|----|----|--------------------------------------------------------|----|----|----------------------------------------|----|
|                                                                 | KK094 (26) | 29                                  | 30                                  | 31                                                     | 32 | 33 | 34                                                     | 35 | 36 | 37                                                     | 38 | 39 | 40                                     | 41 |
| Inhibition of SL-induced D14-D53 complex formation in Y2H assay | +++        | -                                   | ++                                  | -                                                      | -  | -  | -                                                      | -  | -  | -                                                      | -  | -  | -                                      | -  |
| Promotion of rice tillering in wild-type rice                   | +++        | -                                   | ++                                  | -                                                      | -  | -  | -                                                      | -  | -  | -                                                      | -  | -  | -                                      | -  |

867

868 **fig. S4. Inhibition of the SL-dependent D14–D53 interactions and rice tillering by KK094-**  
 869 **derivatives.** Upper line in the bottom column: Growth of AH109 yeast transformed with pGBK-  
 870 D14 and pGAD-T7/pGAD-D53 on an SD-His Ade plate containing 1 μM GR24 with  
 871 experimental compounds for 4 days at 30° C. The extent of growth inhibition is indicated by – to  
 872 +++ (- no inhibition; ++ partial inhibition; +++ complete inhibition). Lower line in the bottom  
 873 column: Inhibition of the effect of SL on rice tillering. Seven-day-old *d17-1* mutant rice seedlings  
 874 were treated with/without 1 μM GR24 and 10 μM KK094-derivatives and grown for 7 days  
 875 before the length of second tillers were measured. The extent of tillering bud growth promotion is  
 876 presented by – to +++ (- no promotion [2nd tiller length = 0 cm]; + weak promotion [2nd tiller  
 877 length = 0–1.0 cm]; ++ intermediate inhibition [2nd tiller length = 1.0–3.0 cm]; +++ strong  
 878 promotion [2nd tiller length > 3.0 cm]).

879

880

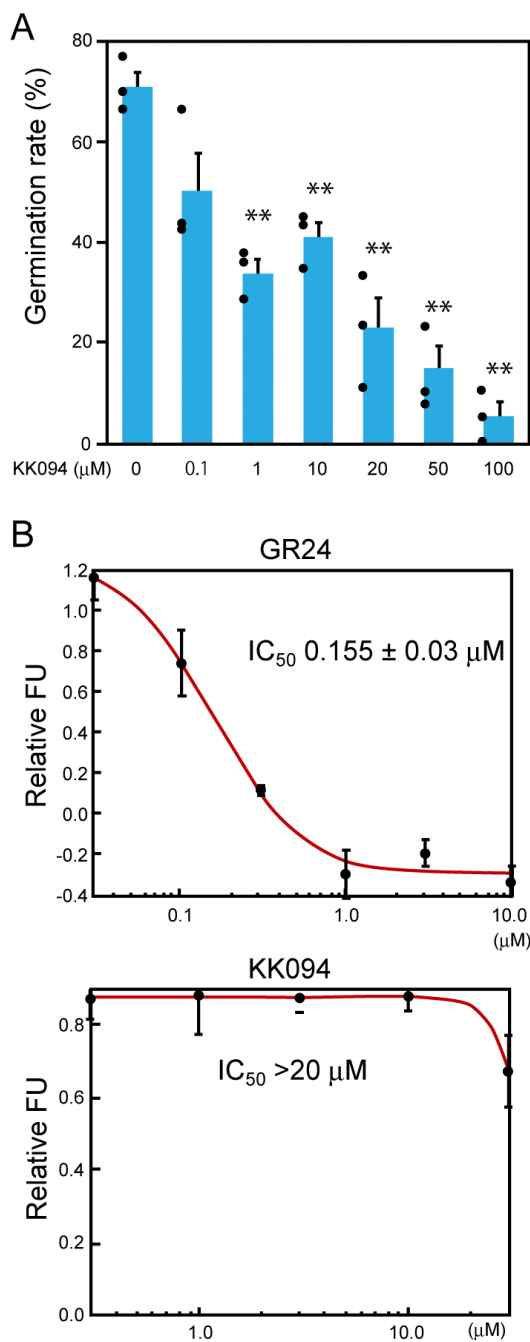

881

882

883

884

885

886

887

888

889

890

891

892

**fig. S5. Inhibition of *Striga* seed germination and a *Striga* SL receptor, ShHTL7, by KK094.**

(A) KK094 concentration-dependently inhibits seed germination of *Striga hermonthica*.

Germination ratios of *Striga* seeds treated with 1 μM of GR24 and KK094 at the concentrations shown. Error bars indicate SE of three independent experiments. Unpaired two-tailed Student's *t*-test was used to determine the significance of differences with the germination rate of KK094-non-treated seeds (\*\**p*<0.01).

(B) Competitive inhibition of ShHTL7-mediated YLG hydrolysis. Following reaction of 0.3 μM of YLG with 0.33 μM of D14, the fluorescent intensity was measured at the excitation wavelength of 485 nm and detected at a wavelength of 535 nm. The fluorescent values relative to the hydrolysis without inhibitor is shown. FU = fluorescence unit.

$IC_{50}$  values were calculated using the website: <http://www.ic50.tk/index.html>.

893

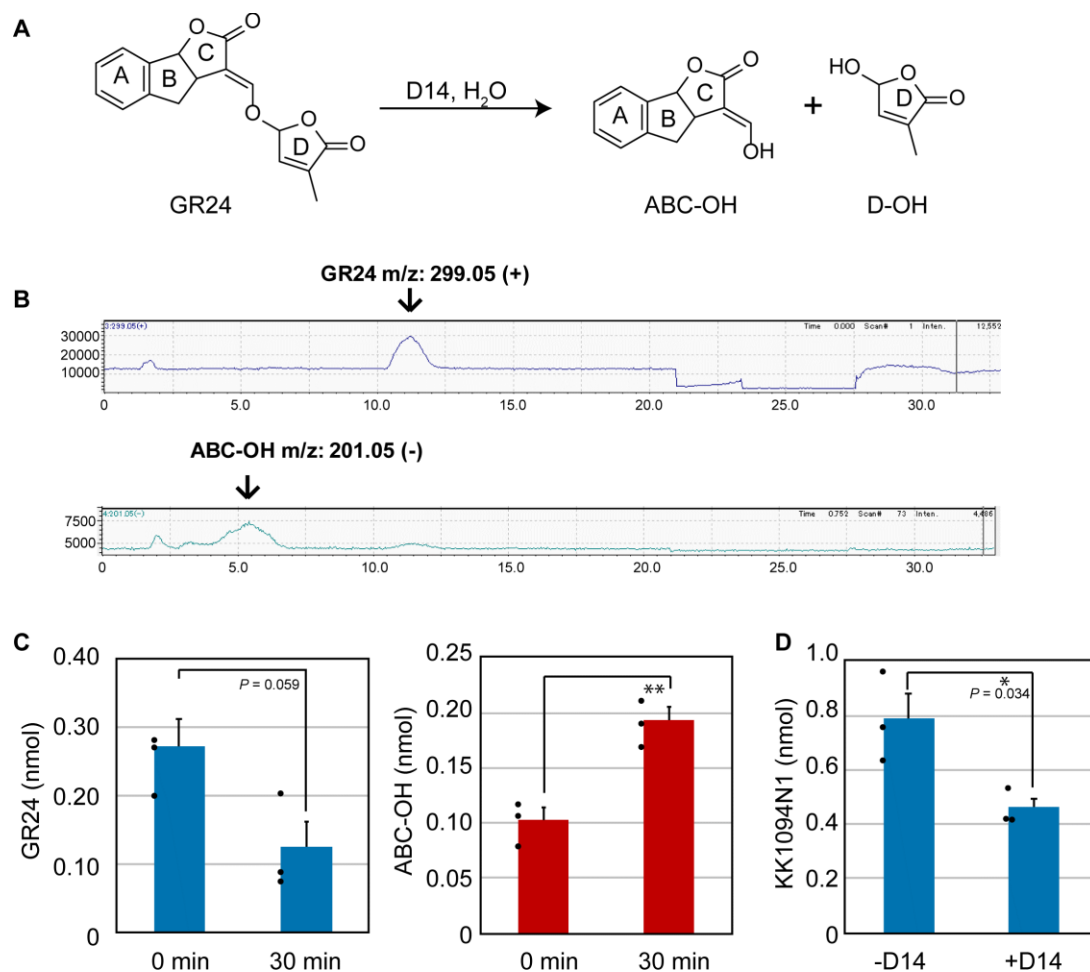

894

895 **fig. S6. LC-MS analyses of GR24- or KK094N1-hydrolysis by D14.** (A) The reaction formula  
896 of D14-mediated hydrolysis of GR24. (B–D) GR24 or KK094 was pre-incubated at 30 °C for 10  
897 min and incubated further at 30 °C for 20 min after addition of 0.33  $\mu\text{M}$  of D14. Then quantities  
898 of GR24 or ABC-OH were monitored using LC-MS (B, C). Quantities of KK094N1 were also  
899 monitored by LC-MS (D). Error bars indicate SE of three sample replicates.. Unpaired two-tailed  
900 Student's *t*-test was used to determine the significance of differences (\* $p < 0.05$ , \*\* $p < 0.01$ ).  
901

902

903

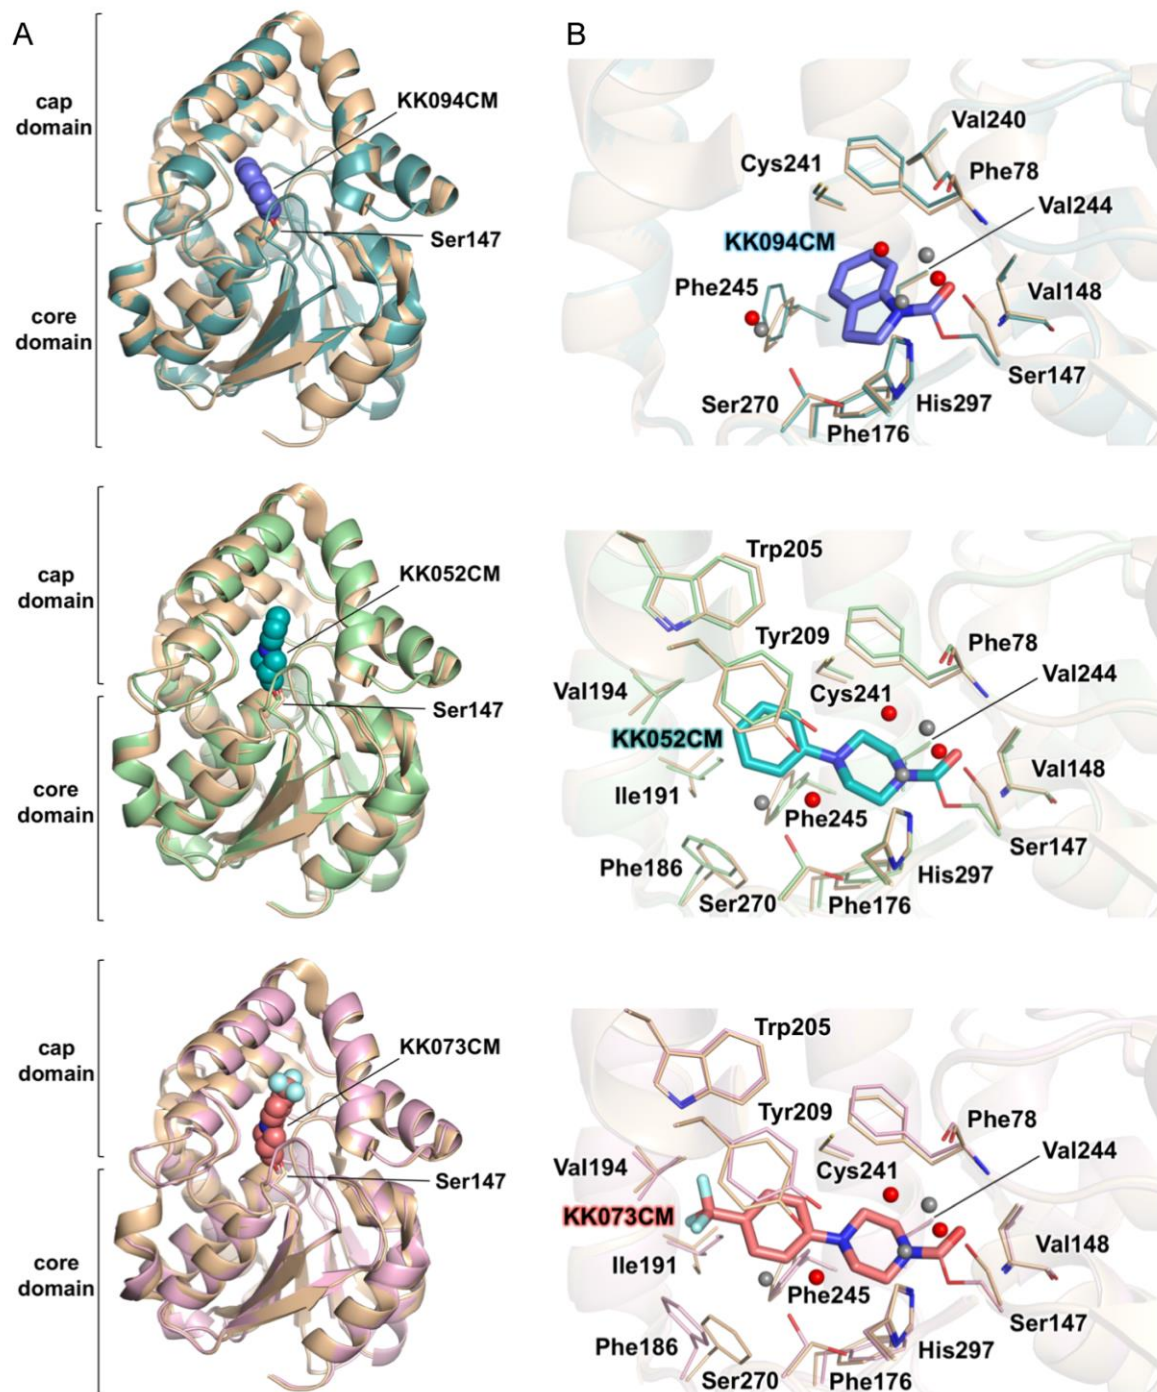

904

905 **fig. S7. Structural comparisons.** (A) KK094CM-bound D14, KK042CM-bound D14, and  
906 KK073CM-bound D14 are superimposed on apo-D14 (PDB ID 3VXK) (white). The orientation  
907 and color coding are the same as in Fig. 3A and Fig. 6A. Each r.m.s.d. for the C $\alpha$  atoms was 0.16  
908 Å (KK094CM), 0.35 Å (KK052CM), and 0.35 Å (KK073CM). (B) The close-up view of the  
909 ligand-binding sites in (A). The orientation and structural representation are the same as in Fig.  
910 3A and 6C. Water molecules from apo-D14 are shown as white balls.

911

912

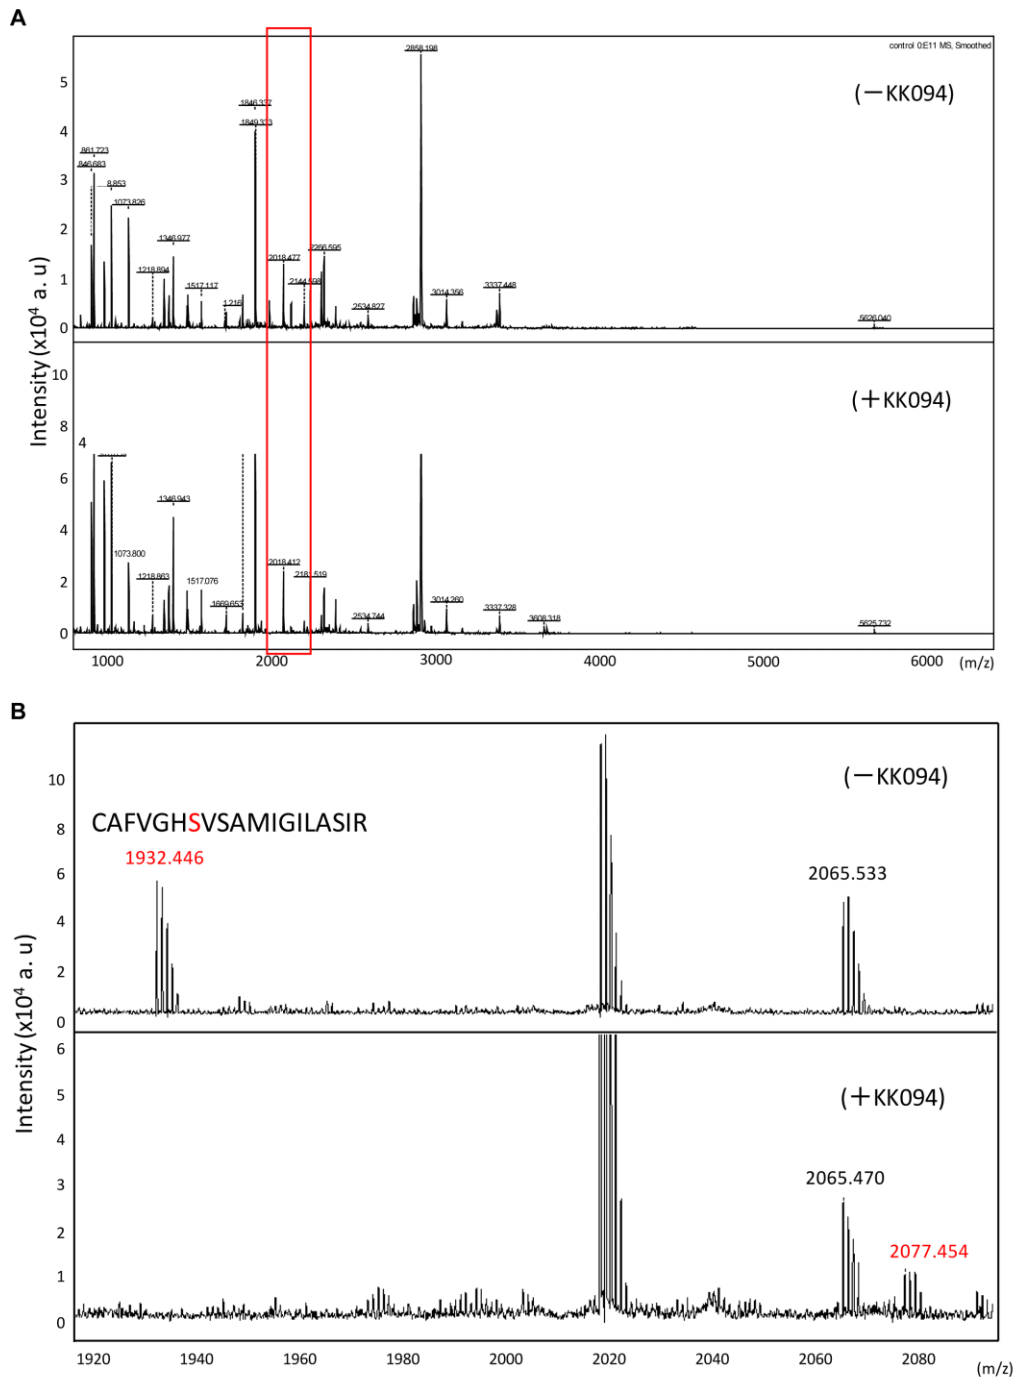

913

914

915

916

917

918

919

920

921

922

923

**fig. S8. MALDI-TOF-MS analysis of trypsin-treated D14 with or without KK094.** (A) D14 was incubated without (upper panel) or with (lower panel) KK094. The reaction mixture of D14 without or with KK094 (-KK094/+KK094, respectively) was dialyzed against 50 mM  $\text{NH}_4\text{HCO}_3$  solution. Dialyzed sample was digested with trypsin and analyzed using MALDI-TOF-MS. (B) Magnification of the red box in panel (A). The fragment corresponding to the peptide 141–159 ( $^{141}\text{CAFVGH SVSAMIGILASIR}^{159}$ ;  $m/z$  1932.446) was detected under the -KK094 condition but was not detected under the +KK094 condition. On the contrary, the peptide fragment with a molecular mass of 2077.454, corresponding to the peptide 141–159 with covalently-bound KK094-CM was detected when D14 was incubated with KK094.



**A**

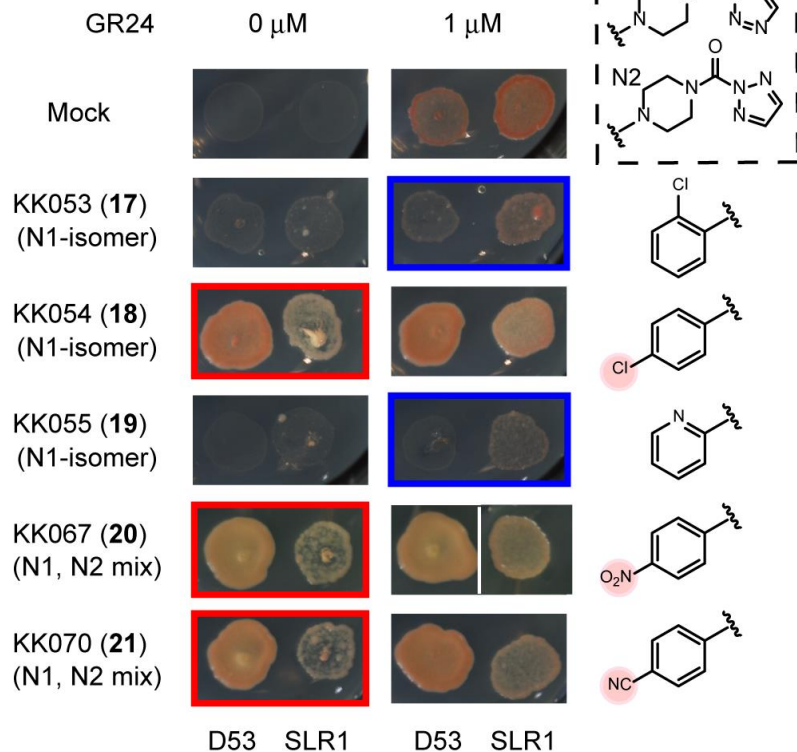

**B**

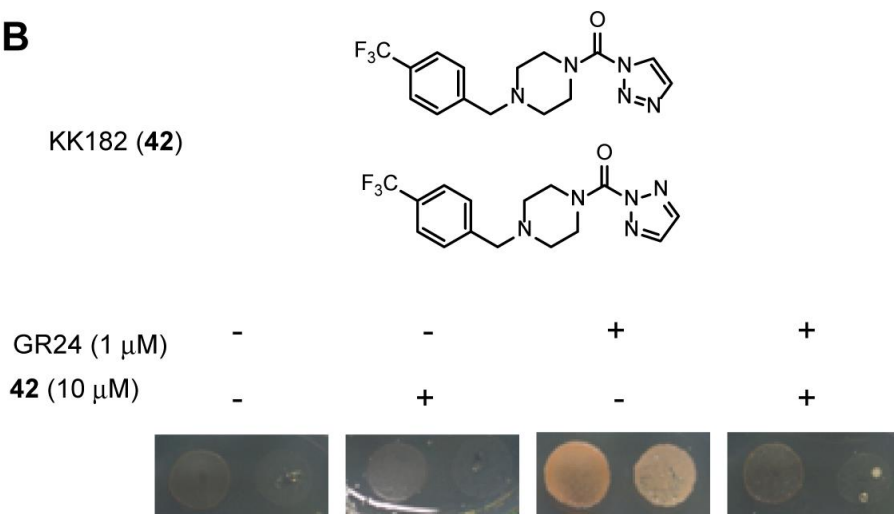

**fig. S9. Inhibition or stimulation of the SL-dependent D14–SLR1/D14–D53 interaction by KK052-derivatives.** (A) Structures of KK052-derivatives are shown on the right. The morphorine structure derived from KK052 (mixture of N1- and N2-compounds; shown in the dashed box) were modified by various substituents. Growth of AH109/pGBK-D14–pGAD-D53 or AH109/pGBK-D14–pGAD-SLR1 on an SD-His Ade plate containing experimental compounds for 4 days at 30 °C. Three compounds showed an agonist effect (in red squares), and two showed antagonism (in blue squares). (B) Structures of KK182 (a mixture of N1- and N2-compounds) and growth of AH109/pGBK-D14–pGAD-D53 on an SD-His Ade plate containing experimental compounds for 4 days at 30 °C.



936

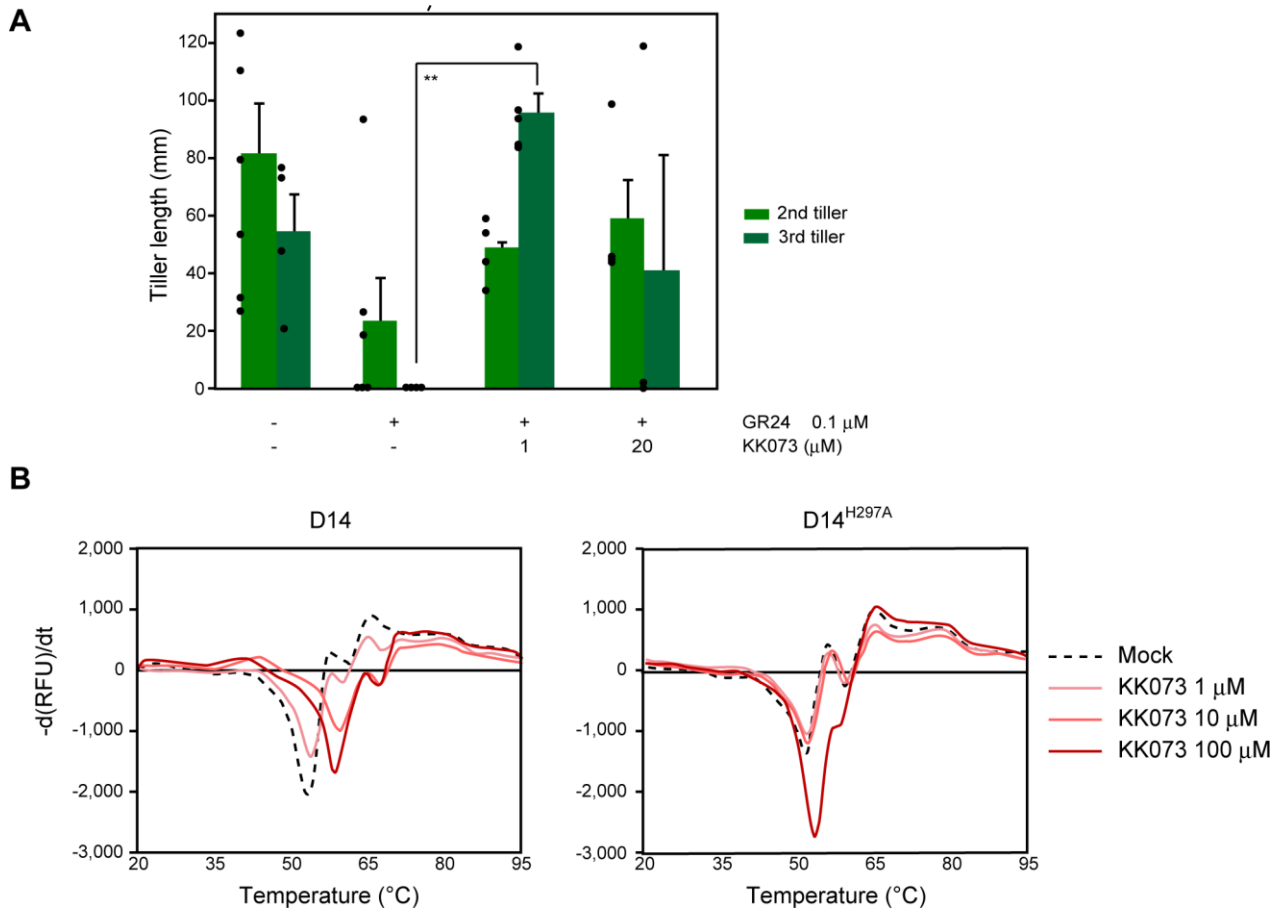

937

938

939 **fig. S10. KK073 showed antagonism of the suppression of rice tillering induced by**  
940 **strigolactone.** (A) KK073 produced attenuation of the tillering inhibition induced by GR24.  
941 Seven-day-old *d10-1* mutant rice seedlings were treated with experimental compounds and grown  
942 for a further 2 weeks, then the length of second/third tillers were measured. Error bars indicate SE  
943 of three to six seedlings. Unpaired two-tailed student's *t*-test was used to determine the  
944 significance of differences (\*\* $p < 0.01$ ). (B) Melting temperature curves for D14 and D14<sup>H297A</sup>  
945 mutant proteins at varying concentrations of KK073 as monitored by differential scanning  
946 fluorimetry. Each line represents the average protein melt curve for three replicate samples  
947 measured in parallel.

948

949

**table S1. X-ray data collection and refinement statistics.**

|                                             | D14–KK094CM<br>complex<br>(5ZHR) | D14–KK052CM<br>complex<br>(5ZHS) | D14–KK073CM<br>complex<br>(5ZHT) |
|---------------------------------------------|----------------------------------|----------------------------------|----------------------------------|
| <b>Data collection</b>                      |                                  |                                  |                                  |
| Space group                                 | $P2_12_12_1$                     | $P3_22_1$                        | $P3_22_1$                        |
| Cell dimensions                             |                                  |                                  |                                  |
| <i>a</i> , <i>b</i> , <i>c</i> (Å)          | 48.25, 88.64, 119.38             | 48.97, 48.97, 192.20             | 49.35, 49.35, 192.47             |
| $\alpha$ , $\beta$ , $\gamma$ (°)           | 90, 90, 90                       | 90, 90, 120                      | 90, 90, 120                      |
| Resolution (Å)                              | 1.45 (1.54 - 1.45)               | 1.49 (1.58 - 1.49)               | 1.53 (1.62 - 1.53)               |
| No. of observations                         | 846,524                          | 434,216                          | 376,778                          |
| No. of unique reflections                   | 90,592                           | 44,884                           | 41,947                           |
| $R_{\text{merge}}^a$ (%)                    | 4.7 (27.4)                       | 6.1 (39.0)                       | 5.8 (39.6)                       |
| $I/\sigma I$                                | 26.3 (5.9)                       | 20.0 (4.3)                       | 20.1 (3.1)                       |
| $CC_{1/2}^b$ (%)                            | 100.0 (95.2)                     | 99.9 (96.2)                      | 99.9 (93.4)                      |
| Completeness (%)                            | 99.0 (94.0)                      | 99.9 (99.2)                      | 99.5 (97.3)                      |
| Redundancy                                  | 9.3 (6.8)                        | 9.7 (9.5)                        | 9.0 (5.8)                        |
| <b>Refinement</b>                           |                                  |                                  |                                  |
| Resolution (Å)                              | 49.51 - 1.45                     | 41.41 - 1.49                     | 41.72 - 1.53                     |
| No. of used reflections                     | 173,170                          | 84,082                           | 78,145                           |
| $R_{\text{work}}^c / R_{\text{free}}^d$ (%) | 16.6/19.9                        | 18.8/21.1                        | 19.5/22.1                        |
| No. of atoms                                |                                  |                                  |                                  |
| Protein                                     | 4,102                            | 2,046                            | 2,051                            |
| Ligand                                      | 22                               | 14                               | 18                               |
| Water                                       | 526                              | 280                              | 283                              |
| <i>B</i> factors (Å <sup>2</sup> )          |                                  |                                  |                                  |
| Protein                                     | 16.2                             | 21.5                             | 24.1                             |
| Ligand                                      | 12.2                             | 16.0                             | 20.0                             |
| Water                                       | 26.2                             | 31.9                             | 34.8                             |
| r.m.s. deviations                           |                                  |                                  |                                  |
| Bond lengths (Å)                            | 0.009                            | 0.005                            | 0.004                            |
| Bond angles (°)                             | 1.215                            | 0.930                            | 0.887                            |
| Ramachandran plot (%)                       |                                  |                                  |                                  |
| Favored                                     | 97.5                             | 97.7                             | 97.3                             |
| Allowed                                     | 2.5                              | 2.3                              | 2.7                              |
| Outliers                                    | 0.0                              | 0.0                              | 0.0                              |

Values in parentheses correspond to the highest-resolution shell.

$$^a R_{\text{merge}} = \frac{\sum_{hkl} \sum_i |I_i(hkl) - \langle I(hkl) \rangle|}{\sum_{hkl} \sum_i I_i(hkl)}$$

<sup>b</sup>CC<sub>1/2</sub> is the percentage of correlation between intensities from random half-datasets.

$$^c R_{\text{work}} = \frac{\sum_{hkl} |F_o(hkl) - |F_c(hkl)||}{\sum_{hkl} |F_o(hkl)|}$$

<sup>d</sup> $R_{\text{free}}$  is the  $R_{\text{work}}$  calculated for 5% of the data set not included in refinements.

954  
955

**table S2. Deduced peptide mass values of D14 fragments digested with trypsin.**

| <i>Num</i> | <i>From-To</i> | <i>MH<sup>+</sup></i> | <i>Mass</i> | <i>Sequence</i>                                         |
|------------|----------------|-----------------------|-------------|---------------------------------------------------------|
| 1          | 1-5            | 429.25                | 428.24      | GPGAK                                                   |
| 2          | 6-13           | 968.63                | 967.62      | LLQLNVR                                                 |
| 3          | 14- 20         | 703.37                | 702.37      | VVGSGER                                                 |
| 4          | 21- 37         | 1845.92               | 1844.92     | VVVLSHGFGTDQSAWSR                                       |
| 5          | 38- 44         | 861.52                | 860.51      | VLPYLTR                                                 |
| 6          | 45- 47         | 427.2                 | 426.2       | DHR                                                     |
| 7          | 48- 67         | 2266.1                | 2265.09     | VVLYDLVCAGSVNPDHFDLR                                    |
| 8          | 68- 68         | 175.12                | 174.11      | R                                                       |
| 9          | 69- 87         | 2181.11               | 2180.1      | YDNLDAYVDDLLAILDALR                                     |
| 10         | 88- 90         | 385.26                | 384.25      | IPR                                                     |
| 11         | 91-109         | 1932.02               | 1931.01     | CAFGHVSAMIGILASIR                                       |
| 12         | 110-116        | 846.48                | 845.48      | RPDLFAK                                                 |
| 13         | 117-125        | 925.58                | 924.58      | LVLIGASPR                                               |
| 14         | 126-177        | 5624.6                | 5623.59     | FLNDSDYHGGFELEEIQQVFDAMGANYSAWATGYAPLAVGADVPAAVQEF<br>R |
| 15         | 178-196        | 2249.16               | 2248.15     | TLFNMRPDISLHVCQTVFK                                     |
| 16         | 197-200        | 504.28                | 503.27      | TDLR                                                    |
| 17         | 201-207        | 731.42                | 730.42      | GVLGMVR                                                 |
| 18         | 208-217        | 1073.58               | 1072.57     | APCVVQVTR                                               |
| 19         | 218-230        | 1319.72               | 1318.71     | DVSVPASVAAYLK                                           |
| 20         | 231-236        | 610.34                | 609.33      | AHLGGR                                                  |
| 21         | 237-262        | 2857.56               | 2856.55     | TTVEFLQTEGHLPHLSAPSLLAQVLR                              |
| 22         | 263-263        | 175.12                | 174.11      | R                                                       |
| 23         | 264-267        | 430.28                | 429.27      | ALAR                                                    |
| 24         | 268-268        | 182.08                | 181.07      | Y                                                       |
| 25         | 1-13           | 1378.85               | 1377.85     | GPGAKLLQLNVR                                            |
| 26         | 6-20           | 1652.98               | 1651.97     | LLQLNVRVVGSGER                                          |
| 27         | 14- 37         | 2530.28               | 2529.27     | VVGSGERVVVLSHGFGTDQSAWSR                                |
| 28         | 21- 44         | 2688.43               | 2687.42     | VVVLSHGFGTDQSAWSRVLPYLTR                                |
| 29         | 38- 47         | 1269.71               | 1268.7      | VLPYLTRDHR                                              |

|    |         |         |         |                                                                            |
|----|---------|---------|---------|----------------------------------------------------------------------------|
| 30 | 45- 67  | 2674.28 | 2673.28 | DHRVVLYDLVCAGSVNPDHFDLFR                                                   |
| 31 | 48- 68  | 2422.2  | 2421.19 | VVLYDLVCAGSVNPDHFDLFR                                                      |
| 32 | 68- 87  | 2337.21 | 2336.2  | RYDNLDAYVDDLLAILDALR                                                       |
| 33 | 69- 90  | 2547.35 | 2546.34 | YDNLDAYVDDLLAILDALRIPR                                                     |
| 34 | 88-109  | 2298.26 | 2297.25 | IPRCAFVGHSVSAMIGILASIR                                                     |
| 35 | 91-116  | 2759.48 | 2758.48 | CAFVGHSVSAMIGILASIRRPDLFAK                                                 |
| 36 | 110-125 | 1753.05 | 1752.04 | RPDLFAKLVLIGASPR                                                           |
| 37 | 117-177 | 6531.17 | 6530.16 | LVLIGASPRFLNDSYHGGFELEEIQQVFDAMGANYSAWATGYAPLAVGAD<br>VPAAVQEFSR           |
| 38 | 126-196 | 7854.74 | 7853.73 | FLNDSYHGGFELEEIQQVFDAMGANYSAWATGYAPLAVGADVPAAVQEFS<br>RTLNFMRPDISLHVCQTVFK |
| 39 | 178-200 | 2734.42 | 2733.41 | TLNFMRPDISLHVCQTVFKTDLR                                                    |
| 40 | 197-207 | 1216.68 | 1215.68 | TDLRGVLMVR                                                                 |
| 41 | 201-217 | 1785.98 | 1784.98 | GVLGMVRAPCVVQVQTR                                                          |
| 42 | 208-230 | 2374.28 | 2373.27 | APCVVQVQTRDVSVPASVAAYLK                                                    |
| 43 | 218-236 | 1911.04 | 1910.04 | DVSVPASVAAYLKAHLGGR                                                        |
| 44 | 231-262 | 3448.88 | 3447.87 | AHLGGRTTVEFLQTEGHLPHLSAPSLLAQVLR                                           |
| 45 | 237-263 | 3013.66 | 3012.65 | TTVEFLQTEGHLPHLSAPSLLAQVLR                                                 |
| 46 | 263-267 | 586.38  | 585.37  | RALAR                                                                      |
| 47 | 264-268 | 593.34  | 592.33  | ALARY                                                                      |

956

957

958

959 **table S3. Theoretical mass values of peptide 141–159 (<sup>141</sup>CAFVGHSVSAMIGILASIR<sup>159</sup>).**

960

| Theoretical mass value: CAFVGHSVSAMIGILASIR |          |     |          |          |
|---------------------------------------------|----------|-----|----------|----------|
| Mass                                        | Fragment |     | Fragment | Mass     |
| 104.017                                     | b1       | Cys | y17      | -        |
| 175.054                                     | b2       | Ala | y16      | 1829.011 |
| 322.123                                     | b3       | Phe | y15      | 1757.974 |
| 421.191                                     | b4       | Val | y14      | 1610.905 |
| 478.212                                     | b5       | Gly | y13      | 1511.837 |
| 615.271                                     | b6       | His | y12      | 1454.815 |
| 702.303                                     | b7       | Ser | y11      | 1317.756 |
| 801.372                                     | b8       | Val | y10      | 1230.724 |
| 888.404                                     | b9       | Ser | y9       | 1131.656 |
| 959.441                                     | b10      | Ala | y8       | 1044.624 |
| 1090.481                                    | b11      | Met | y7       | 973.587  |
| 1203.565                                    | b12      | Ile | y6       | 842.546  |
| 1260.587                                    | b13      | Gly | y5       | 729.462  |
| 1373.671                                    | b14      | Ile | y4       | 672.441  |
| 1486.755                                    | b15      | Leu | y3       | 559.357  |
| 1557.792                                    | b16      | Ala | y2       | 446.273  |
| 1644.824                                    | b17      | Ser | y1       | 375.236  |
| 1757.908                                    | b18      | Ile | y0       | 288.204  |
| -                                           | b19      | Arg | y1       | 175.120  |

961

962

963  
964

| Theoretical mass value: CAFVGH <b>SV</b> SAMIGILASIR+ <b>KK094CM</b> |          |            |          |                 |
|----------------------------------------------------------------------|----------|------------|----------|-----------------|
| Mass                                                                 | Fragment |            | Fragment | Mass            |
| 104.017                                                              | b1       | Cys        | y17      | -               |
| 175.054                                                              | b2       | Ala        | y16      | <b>1974.064</b> |
| 322.123                                                              | b3       | Phe        | y15      | <b>1903.026</b> |
| 421.191                                                              | b4       | Val        | y14      | <b>1755.958</b> |
| 478.212                                                              | b5       | Gly        | y13      | <b>1656.890</b> |
| 615.271                                                              | b6       | His        | y12      | <b>1599.868</b> |
| <b>847.356</b>                                                       | b7       | <b>Ser</b> | y11      | <b>1462.809</b> |
| <b>946.425</b>                                                       | b8       | Val        | y10      | 1230.724        |
| <b>1033.457</b>                                                      | b9       | Ser        | y9       | 1131.656        |
| <b>1104.494</b>                                                      | b10      | Ala        | y8       | 1044.624        |
| <b>1235.534</b>                                                      | b11      | Met        | y7       | 973.587         |
| <b>1348.618</b>                                                      | b12      | Ile        | y6       | 842.546         |
| <b>1405.640</b>                                                      | b13      | Gly        | y5       | 729.462         |
| <b>1518.724</b>                                                      | b14      | Ile        | y4       | 672.441         |
| <b>1631.808</b>                                                      | b15      | Leu        | y3       | 559.357         |
| <b>1702.845</b>                                                      | b16      | Ala        | y2       | 446.273         |
| <b>1789.877</b>                                                      | b17      | Ser        | y1       | 375.236         |
| <b>1902.961</b>                                                      | b18      | Ile        | y0       | 288.204         |
| -                                                                    | b19      | Arg        | y1       | 175.120         |

965 \* Shaded cells represent that these fragments were detected. Mass values written in bold letters represent that these  
966 fragments covalently bind to KK094CM.

967

968

## 969 Supplementary Notes

970

971 **General Procedure:** NMR spectra ( $^1\text{H}$ ,  $^{13}\text{C}$ ) were recorded at 500 MHz on a JNM-A500  
972 spectrometer (JEOL, Tokyo, Japan) or a VNMR500 spectrometer (Agilent, CA). High resolution  
973 mass spectra (HRMS) were determined by electrospray ionization coupled to a time-of-flight  
974 analyser (Triple TOF 5600+ system, SCIEX, MA).

975

976 **KK002-N1 (1), KK002-N2 (2):** *N,N*-diethyl-1*H*-1,2,3-triazole-1-carboxamide (**1**), *N,N*-diethyl-  
977 2*H*-1,2,3-triazole-2-carboxamide (**2**).

978 The mixture of diethylcarbonyl chloride (136 mg, 1 mmol), 1*H*-1,2,3-triazole (83 mg, 1.2  
979 mmol) and *N,N*-dimethyl-4-aminopyridine (DMAP) (cat.) in tetrahydrofuran (THF)/triethylamine  
980 ( $\text{NEt}_3$ ) (5:1, 2 mL) was stirred overnight at 60 °C. The solvent was removed under vacuum and the  
981 resulting residue was purified on a silica gel column (Hexane/ethyl acetate (EtOAc) 7:3 to 6:4)  
982 giving KK002-N1 (**1**) as colorless oil (73mg, 43%) and KK002-N2 (**2**) as a white solid (55 mg,  
983 33%).

984 **KK002-N1 (1);**  $^1\text{H}$  NMR (500 MHz,  $\text{CDCl}_3$ ):  $\delta$  8.19 (d,  $J = 1.0$  Hz, 1H), 7.72 (d,  $J = 1.0$  Hz, 1H),  
985 3.80-3.40 (m, 4H), 1.33 (t,  $J = 7.0$  Hz, 6H).  $^{13}\text{C}$  NMR (125 MHz,  $\text{CDCl}_3$ ):  $\delta$  148.7, 132.7, 125.2,  
986 44.3, 14.1. HRMS ( $m/z$ ): calcd. for  $\text{C}_7\text{H}_{12}\text{N}_4\text{ONa}$  [ $\text{M}+\text{Na}$ ] $^+$ : 191.0903; found, 191.0905.

987 **KK002-N2 (2);**  $^1\text{H}$  NMR (500 MHz,  $\text{CDCl}_3$ ):  $\delta$  7.80 (s, 2H), 3.75-3.30 (m, 4H), 1.29 (t,  $J = 7.0$   
988 Hz, 6H).  $^{13}\text{C}$  NMR (125 MHz,  $\text{CDCl}_3$ ):  $\delta$  135.6, 43.1, 12.4. HRMS ( $m/z$ ): calcd. for  $\text{C}_7\text{H}_{12}\text{N}_4\text{O}$   
989 [ $\text{M}+\text{Na}$ ] $^+$ : 191.0903; found, 191.0911.

990

991 **KK003-N1 (3), KK003-N2 (4):** *N,N*-diphenyl-1*H*-1,2,3-triazole-1-carboxamide (**3**), *N,N*-  
992 diphenyl-2*H*-1,2,3-triazole-2-carboxamide (**4**).

993 The mixture of diphenylcarbonyl chloride (280 mg, 1.21 mmol), 1*H*-1,2,3-triazole (100 mg,  
994 1.45 mmol) and DMAP (cat.) in THF/ $\text{NEt}_3$  (5:1, 2 mL) was stirred overnight at 60 °C. The solvent  
995 was removed under vacuum and the resulting residue was purified on a silica gel column  
996 (Hexane/EtOAc 7:3 to 6:4) giving KK003-N1 (**3**) (197 mg, 62%) as a white solid and KK003-N2  
997 (**4**) (121mg, 38%) as a white solid.

998 **KK003-N1 (3);**  $^1\text{H}$  NMR (500 MHz,  $\text{CDCl}_3$ ):  $\delta$  8.11 (d,  $J = 1.3$  Hz, 1H), 7.59 (d,  $J = 1.3$  Hz, 1H),  
999 7.38-7.33 (m, 4H), 7.30-7.25 (m, 2H), 7.23-7.18 (m, 4H).  $^{13}\text{C}$  NMR (125 MHz,  $\text{CDCl}_3$ ):  $\delta$  148.81,  
1000 142.30, 132.74, 129.51, 127.49, 126.48, 124.51.

1001 **KK003-N2 (4);**  $^1\text{H}$  NMR (500 MHz,  $\text{CDCl}_3$ ):  $\delta$  8.11 (d,  $J = 1.3$  Hz, 1H), 7.59 (d,  $J = 1.3$  Hz, 1H),



1002 7.38-7.33 (m, 4H), <sup>1</sup>H NMR (500 MHz, CDCl<sub>3</sub>): δ 7.61 (s, 2H), 7.30-7.34 (m, 4H), 7.22-7.26 (m,  
1003 2H), 7.16-7.18 (m, 4H). <sup>13</sup>C NMR (125 MHz, CDCl<sub>3</sub>): δ 149.31, 142.55, 136.17, 129.32, 127.02,  
1004 126.30.

1005

1006 **KK004-N1 (5)**, **KK004-N2 (6)**: morpholino(1*H*-1,2,3-triazol-1-yl)methanone (**5**),  
1007 morpholino(2*H*-1,2,3-triazol-2-yl)methanone (**6**).

1008 The mixture of 4-morpholinecarbonyl chloride (150 mg, 1 mmol), 1*H*-1,2,3-triazole (83 mg, 1.2  
1009 mmol) and DMAP (cat.) in THF/NEt<sub>3</sub> (5:1, 2 mL) was stirred overnight at 60 °C. The solvent was  
1010 removed under vacuum and the resulting residue was purified on a silica gel column  
1011 (Hexane/EtOAc 7:3 to 6:4) giving **KK004-N1 (5)** (53 mg, 29%) as a white solid and **KK004-N2**  
1012 (**6**) (26 mg, 14%) as a white solid.

1013 **KK004-N1 (5)**; <sup>1</sup>H NMR (500 MHz, CDCl<sub>3</sub>): δ 8.19 (d, *J* = 1.1 Hz, 1H), 7.74 (d, *J* = 1.1 Hz, 1H),  
1014 4.17-3.66 (m, 8H). <sup>13</sup>C NMR (125 MHz, CDCl<sub>3</sub>): δ 133.0, 125.4, 66.6, 48.4, 45.7. HRMS (*m/z*):  
1015 calcd. for C<sub>7</sub>H<sub>10</sub>N<sub>4</sub>O<sub>2</sub> [M+Na]<sup>+</sup>: 205.0696; found, 205.0695.

1016 **KK004-N2 (6)**; <sup>1</sup>H NMR (500 MHz, CDCl<sub>3</sub>): δ 7.83 (s, 2H), 4.10-3.65 (m, 4H). <sup>13</sup>C NMR (125  
1017 MHz, CDCl<sub>3</sub>): δ 136.2, 66.6, 48.4, 45.8. HRMS (*m/z*): calcd. for C<sub>7</sub>H<sub>10</sub>N<sub>4</sub>O<sub>2</sub> [M+Na]<sup>+</sup>: 205.0696;  
1018 found, 205.0694.

1019

1020 **KK007-N1 (7)**, **KK007-N2 (8)**: pyrrolidin-1-yl(1*H*-1,2,3-triazol-1-yl)methanone (**7**), pyrrolidin-  
1021 1-yl(2*H*-1,2,3-triazol-2-yl)methanone (**8**).

1022 The mixture of 1-pyrrolidinecarbonyl chloride (100 mg, 0.8 mmol), 1*H*-1,2,3-triazole (124 mg,  
1023 1.8 mmol) and DMAP (cat.) in THF/NEt<sub>3</sub> (5:1, 2 mL) was stirred overnight at 60 °C. The solvent  
1024 was removed under vacuum and the resulting residue was purified on a silica gel column  
1025 (Hexane/EtOAc 7:3 to 6:4) giving **KK007-N1 (7)** (68 mg, 55%) as a white solid and **KK007-N2**  
1026 (**8**) (36 mg, 29%) as a white solid.

1027 **KK007-N1 (7)**; <sup>1</sup>H NMR (500 MHz, CDCl<sub>3</sub>): δ 8.31 (d, *J* = 1.4 Hz, 1H), 7.72 (d, *J* = 1.4 Hz, 1H),  
1028 4.04 (t, *J* = 6.5 Hz, 2H), 3.74 (t, *J* = 6.7 Hz, 2H), 2.08-1.95 (m, 4H). <sup>13</sup>C NMR (125 MHz,  
1029 CDCl<sub>3</sub>): δ 147.12, 132.59, 124.65, 50.25, 48.92, 26.48, 23.90. HRMS (*m/z*): calcd. for C<sub>7</sub>H<sub>10</sub>N<sub>4</sub>O  
1030 [M+Na]<sup>+</sup>: 189.0747; found, 189.0751.

1031 **KK007-N2 (8)**; <sup>1</sup>H NMR (500 MHz, CDCl<sub>3</sub>): δ 7.81 (s, 2H), 3.84 (t, *J* = 6.4 Hz, 2H), 3.75 (t, *J* =  
1032 6.5 Hz, 2H), 2.02-1.94 (m, 4H). <sup>13</sup>C NMR (125 MHz, CDCl<sub>3</sub>): δ 135.80, 50.02, 48.62, 26.44,  
1033 24.12. HRMS (*m/z*): calcd. for C<sub>7</sub>H<sub>10</sub>N<sub>4</sub>O [M+Na]<sup>+</sup>: 189.0747; found, 189.0749.

1034

1035 **KK020 (9)**: (4-benzyl-1*H*-1,2,3-triazol-1-yl)(pyrrolidin-1-yl)methanone.

1036 The mixture of 1-pyrrolidinecarbonyl chloride (190 mg, 1.4 mmol), 4-benzyl-1*H*-1,2,3-triazole  
1037 (226 mg, 1.4 mmol) and DMAP (cat.) in THF/NEt<sub>3</sub> (5:1, 2 mL) was stirred overnight at 60 °C. The  
1038 solvent was removed under vacuum and the resulting residue was purified on a silica gel column  
1039 (Hexane/EtOAc 7:3 to 6:4) giving KK020 (**9**) (86 mg, 24%) as yellow oil.

1040 <sup>1</sup>H NMR (500 MHz, CDCl<sub>3</sub>): δ 7.91 (s, 1H), 7.21-7.34 (m, 5H), 4.11 (s, 2H), 4.01 (t, *J* = 6.3 Hz,  
1041 2H), 3.69 (t, *J* = 6.6 Hz, 2H), 1.92-2.04 (m, 4H). <sup>13</sup>C NMR (125 MHz, CDCl<sub>3</sub>): δ 147.2, 146.5,  
1042 138.3, 128.7, 128.7, 126.7, 50.2, 48.9, 31.9, 26.5, 23.9. HRMS (*m/z*): calcd. for C<sub>14</sub>H<sub>16</sub>N<sub>4</sub>O  
1043 [M+H]<sup>+</sup>: 257.1397; found, 257.1403.

1044  
1045 **KK021 (10)**: (4-(6-methoxynaphthalen-2-yl)-1*H*-1,2,3-triazol-1-yl)(pyrrolidin-1-yl)methanone.  
1046 The mixture of 1-pyrrolidinecarbonyl chloride (190 mg, 1.4 mmol), 4-(6-methoxynaphthalen-2-  
1047 yl)-1*H*-1,2,3-triazole (338 mg, 1.5 mmol) and DMAP (cat.) in THF/NEt<sub>3</sub> (5:1, 2 mL) was stirred  
1048 overnight at 60 °C. The solvent was removed under vacuum and the resulting residue was purified  
1049 on a silica gel column (Hexane/EtOAc 7:3 to 6:4) giving KK021 (**10**) (47 mg, 10%) as a white  
1050 solid.

1051 <sup>1</sup>H NMR (500 MHz, CDCl<sub>3</sub>): δ 8.56 (s, 1H), 8.34 (s, 1H), 7.92 (dd, *J* = 8.3, 1.7 Hz, 1H), 7.86-  
1052 7.77 (m, 2H), 7.21-7.14 (m, 2H), 4.10 (t, *J* = 6.5 Hz, 2H), 3.94 (s, 3H), 3.77 (t, *J* = 6.5 Hz, 2H),  
1053 2.09-1.97 (m, 4H). <sup>13</sup>C NMR (125 MHz, CDCl<sub>3</sub>): δ 158.13, 147.19, 146.62, 134.60, 129.81,  
1054 128.91, 127.51, 124.82, 124.79, 124.31, 120.01, 119.44, 105.78, 55.33, 50.34, 49.01, 26.58, 23.96.  
1055 HRMS (*m/z*): calcd. for C<sub>18</sub>H<sub>18</sub>N<sub>4</sub>O<sub>2</sub> [M+H]<sup>+</sup>: 323.1503; found, 323.1498.

1056  
1057 **KK022 (11)**: (4-phenyl-1*H*-1,2,3-triazol-1-yl)(pyrrolidin-1-yl)methanone.

1058 The mixture of 1-pyrrolidinecarbonyl chloride (417 mg, 3.1 mmol), 4-phenyl-1*H*-1,2,3-triazole  
1059 (300 mg, 2.1 mmol) and DMAP (cat.) in THF/NEt<sub>3</sub> (5:1, 2 mL) was stirred overnight at 60 °C. The  
1060 solvent was removed under vacuum and the resulting residue was purified on a silica gel column  
1061 (Hexane/ EtOAc 7:3 to 6:4) giving KK022 (**11**) (243 mg, 48%) as a white solid.

1062 <sup>1</sup>H NMR (500 MHz, CDCl<sub>3</sub>): δ 8.49 (s, 1H), 7.91-7.86 (m, 2H), 7.49-7.43 (m, 2H), 7.41-7.34 (m,  
1063 1H), 4.07 (t, *J* = 6.7 Hz, 2H), 3.75 (t, *J* = 6.7 Hz, 2H), 2.09-1.95 (m, 4H). <sup>13</sup>C NMR (125 MHz,  
1064 CDCl<sub>3</sub>): δ 147.08, 146.35, 129.60, 129.06, 128.91, 128.78, 128.60, 125.88, 120.17, 50.28, 48.96,  
1065 26.52, 23.89. HRMS (*m/z*): calcd. for C<sub>13</sub>H<sub>14</sub>N<sub>4</sub>O [M+H]<sup>+</sup>: 243.1240; found, 243.1238.

1066  
1067 **KK025 (12)**: (4-(4-phenoxyphenyl)-1*H*-1,2,3-triazol-1-yl)(pyrrolidin-1-yl)methanone.

1068 The mixture of 1-pyrrolidinecarbonyl chloride (480 mg, 3.6 mmol), 4-(4-phenoxyphenyl)-1*H*-  
1069 1,2,3-triazole (568 mg, 2.4 mmol) and DMAP (cat.) in THF/NEt<sub>3</sub> (5:1, 2 mL) was stirred overnight

1070 at 60 °C. The solvent was removed under vacuum and the resulting residue was purified on a  
1071 silica gel column (Hexane/EtOAc 7:3 to 6:4) giving KK025 (**12**) (219 mg, 27%) as a white solid.  
1072 <sup>1</sup>H NMR (500 MHz, CDCl<sub>3</sub>): δ 8.44 (s, 1H), 7.84 (dt, *J* = 9.2, 2.4 Hz, 2H), 7.43-7.30 (m, 2H),  
1073 7.18-7.11 (m, 1H), 7.11-7.01 (m, 4H), 4.07 (t, *J* = 6.6 Hz, 2H), 3.75 (t, *J* = 6.6 Hz, 2H), 2.09-1.96  
1074 (m, 4H). <sup>13</sup>C NMR (125 MHz, CDCl<sub>3</sub>): δ 157.80, 156.70, 147.09, 145.92, 129.82, 127.42, 124.61,  
1075 123.62, 119.68, 119.20, 118.98, 50.28, 48.97, 26.54, 23.90. HRMS (*m/z*): calcd. for C<sub>13</sub>H<sub>12</sub>N<sub>4</sub>OCl<sub>2</sub>  
1076 [M+H]<sup>+</sup>: 311.0461; found, 311.0460.

1077  
1078 **KK030 (13)**: (4-(3,4-dichlorophenyl)-1*H*-1,2,3-triazol-1-yl)(pyrrolidin-1-yl)methanone.  
1079 The mixture of 1-pyrrolidinecarbonyl chloride (810 mg, 6.1 mmol), 4-(3,4-dichlorophenyl)-1*H*-  
1080 1,2,3-triazole(865mg, 4.0mmol) and DMAP (cat.) in THF/NEt<sub>3</sub> (5:1, 2 mL) was stirred overnight  
1081 at 60 °C. The solvent was removed under vacuum and the resulting residue was purified on a  
1082 silica gel column (Hexane/EtOAc 7:3 to 6:4) giving KK030 (**13**) (407 mg, 32%) as a white solid.  
1083 <sup>1</sup>H NMR (500 MHz, CDCl<sub>3</sub>): δ 8.51 (s, 1H), 8.00 (d, *J* = 1.9 Hz, 1H), 7.71 (dd, *J* = 8.3, 1.9 Hz,  
1084 1H), 7.52 (d, *J* = 8.3 Hz, 1H), 4.07 (t, *J* = 6.5 Hz, 2H), 3.76 (t, *J* = 6.7 Hz, 2H), 2.10-1.96 (m, 4H).  
1085 <sup>13</sup>C NMR (125 MHz, CDCl<sub>3</sub>): δ 146.76, 144.26, 133.20, 132.53, 130.94, 129.66, 127.68, 125.02,  
1086 120.75, 50.29, 49.06, 26.53, 23.90. HRMS (*m/z*): calcd. for C<sub>19</sub>H<sub>18</sub>N<sub>4</sub>O<sub>2</sub> [M+H]<sup>+</sup>: 335.1503;  
1087 found, 335.1505.

1088  
1089 **KK031 (14)**: pyrrolidin-1-yl(4-(4-(trifluoromethoxy)phenyl)-1*H*-1,2,3-triazol-1-yl)methanone.  
1090 The mixture of 1-pyrrolidinecarbonyl chloride (432 mg, 3.2 mmol), 4-(4-  
1091 (trifluoromethoxy)phenyl)-1*H*-1,2,3-triazole (494 mg, 2.2 mmol) and DMAP (cat.) in THF/NEt<sub>3</sub>  
1092 (5:1, 2 mL) was stirred overnight at 60 °C. The solvent was removed under vacuum and the  
1093 resulting residue was purified on a silica gel column (Hexane/EtOAc 7:3 to 6:4) giving KK031  
1094 (**14**) (264 mg, 38%) as a white solid.  
1095 <sup>1</sup>H NMR (500 MHz, CDCl<sub>3</sub>): δ 8.50 (s, 1H), 7.94-7.90 (m, 2H), 7.34-7.28 (m, 2H), 4.08 (t, *J* = 6.6  
1096 Hz, 2H), 3.76 (t, *J* = 6.6 Hz, 2H), 2.10-1.97 (m, 4H). <sup>13</sup>C NMR (125 MHz, CDCl<sub>3</sub>): δ 149.29,  
1097 146.92, 145.14, 128.41, 127.34, 121.43, 120.42, 119.39, 50.30, 49.03, 26.54, 23.90. HRMS (*m/z*):  
1098 calcd. for C<sub>14</sub>H<sub>13</sub>N<sub>4</sub>O<sub>2</sub>F<sub>3</sub>, [M+H]<sup>+</sup>: 327.1063, found, 327.1068.

1099  
1100 **KK032 (15)**: (4-(3,5-difluorophenyl)-1*H*-1,2,3-triazol-1-yl)(pyrrolidin-1-yl)methanone.  
1101 The mixture of 1-pyrrolidinecarbonyl chloride (817 mg, 6.1 mmol), 4-(3,5-difluorophenyl)-1*H*-  
1102 1,2,3-triazole (739 mg, 4.1 mmol) and DMAP (cat.) in THF/NEt<sub>3</sub> (5:1, 2 mL) was stirred overnight  
1103 at 60 °C. The solvent was removed under vacuum and the resulting residue was purified on a

1104 silica gel column (Hexane/EtOAc 7:3 to 6:4) giving KK032 (**15**) (264 mg, 38%) as a white solid.  
1105 <sup>1</sup>H NMR (500 MHz, CDCl<sub>3</sub>): δ 8.54 (s, 1H), 7.45-7.39 (m, 2H), 6.82 (tt, *J* = 8.8, 2.3 Hz, 1H), 4.07  
1106 (t, *J* = 6.6 Hz, 2H), 3.76 (t, *J* = 6.6 Hz, 2H), 2.10-1.97 (m, 4H). <sup>13</sup>C NMR (125 MHz, CDCl<sub>3</sub>): δ  
1107 164.38, 162.40, 146.73, 144.45, 132.76, 121.15, 108.80, 103.84, 50.30, 49.07, 26.52, 23.89.

1108 HRMS (*m/z*): calcd. for C<sub>13</sub>H<sub>12</sub>N<sub>4</sub>O<sub>F</sub><sub>2</sub> [M+Na]<sup>+</sup>: 279.1052; found, 279.1054;

1109

1110

1111 **KK052 (16)**: The mixture of (4-phenylpiperazin-1-yl)(1*H*-1,2,3-triazol-1-yl)methanone (N1-  
1112 isomer) and (4-phenylpiperazin-1-yl)(2*H*-1,2,3-triazol-2-yl)methanone (N2-isomer).

1113 The mixture of 4-phenylpiperazine-1-carbonyl chloride(191mg, 0.9mmol), 4-(3,5-  
1114 difluorophenyl)-*NH*-1,2,3-triazole (70 mg, 1.0 mmol) and DMAP (cat.) in THF/NEt<sub>3</sub> (5:1, 2 mL)  
1115 was stirred overnight at 60 °C. The solvent was removed under vacuum and the resulting residue  
1116 was purified on a silica gel column (Hexane/EtOAc 7:3 to 6:4) giving KK052 (**16**) (215 mg, 98%,  
1117 NMR ratio N1-isomer:N2-isomer=2:1) as a white solid.

1118 **KK052-N1**: <sup>1</sup>H NMR (500 MHz, CDCl<sub>3</sub>): δ 8.21 (d, *J* = 1.1 Hz, 1H), 7.75 (d, *J* = 1.1 Hz, 1H),  
1119 7.33-7.28 (m, 2H), 6.98-6.91 (m, 3H), 4.25-3.85 (m, 4H), 3.43-3.24 (m, 4H). <sup>13</sup>C NMR (125 MHz,  
1120 CDCl<sub>3</sub>): δ 150.58, 148.05, 132.99, 129.30, 125.44, 120.86, 116.75, 49.61, 49.31, 47.81, 45.47.  
1121 HRMS (*m/z*): calcd. for C<sub>13</sub>H<sub>15</sub>N<sub>5</sub>O [M+H]<sup>+</sup>: 258.1349; found, 258.1347.

1122 **KK052-N1**: <sup>1</sup>H NMR (500 MHz, CDCl<sub>3</sub>) δ 7.85 (s, 2H), 7.33-7.28 (m, 2H), 6.97-6.91 (m, 3H),  
1123 4.03-3.83 (m, 4H), 3.44-3.19 (m, 4H). <sup>13</sup>C NMR (126 MHz, CDCl<sub>3</sub>) δ 150.69, 148.93, 136.17,  
1124 129.28, 120.79, 116.76, 49.43, 47.56, 45.29. HRMS (*m/z*): calcd. for C<sub>13</sub>H<sub>15</sub>N<sub>5</sub>O [M+H]<sup>+</sup>:  
1125 258.1349; found, 258.1348.

1126

1127 **KK053-N1 (17)**: (4-(2-chlorophenyl)piperazin-1-yl)(1*H*-1,2,3-triazol-1-yl)methanone.

1128 1-(2-chlorophenyl)piperazine (150 mg, 0.8 mmol) and *N,N*-diisopropylethylamine (296 mg, 2.3  
1129 mmol) were added to the triphosgene (113 mg, 0.4 mmol) solution in THF (5 mL) keeping the  
1130 temperature inside <10 °C and cooled to 0 °C. The reaction was stirred for 15 min on ice. After  
1131 adding iced water, the reaction solution was extracted with EtOAc twice. The EtOAc layer was  
1132 combined, dehydrated with Na<sub>2</sub>SO<sub>4</sub> and the solvent was removed under vacuum and the  
1133 carbamoyl chloride intermediate was obtained. The resulting residue was dissolved in THF (5  
1134 mL) and *N,N*-diisopropylethylamine (713 mg, 5.5 mmol), 1*H*-1,2,3-triazole (63 mg, 0.9 mmol)  
1135 and DMAP (cat.) were added on ice and stirred overnight at room temperature (rt). Then the  
1136 solvent was removed under vacuum and the resulting residue was dissolved and extracted with  
1137 EtOAc and water twice. The EtOAc layer was combined and the solvent was removed under

1138 vacuum and the resulting residue was purified on a silica gel column (Hexane:AcOEt=7:3 to 1:1)  
1139 giving KK053-N1 (**17**) (88 mg, 40%) as a white solid. <sup>1</sup>H NMR (500 MHz, CDCl<sub>3</sub>): δ 8.21 (d, *J* =  
1140 1.3 Hz, 1H), 7.75 (d, *J* = 1.3 Hz, 1H), 7.40 (dd, *J* = 7.8, 1.4 Hz, 1H), 7.27-7.23 (m, 1H), 7.08-7.01  
1141 (m, 2H), 4.27-3.86 (m, 4H), 3.28-3.13 (m, 4H). <sup>13</sup>C NMR (125 MHz, CDCl<sub>3</sub>): δ 148.24, 132.97,  
1142 130.75, 128.97, 127.74, 125.40, 124.54, 120.61, 51.26, 50.94, 48.22, 45.82. HRMS (*m/z*): calcd.  
1143 for C<sub>13</sub>H<sub>14</sub>N<sub>5</sub>OCl [M+H]<sup>+</sup>: 292.0960; found, 292.0958.

1144

1145 **KK054-N1 (18)**: (4-(4-chlorophenyl)piperazin-1-yl)(1*H*-1,2,3-triazol-1-yl)methanone.

1146 KK054-N1 (**18**) was synthesized as the same method as compound **17**. The carbamoyl chloride  
1147 intermediate was obtained with 1-(4-chlorophenyl)piperazine (150 mg, 0.8 mmol), *N,N*-  
1148 diisopropylethylamine (296 mg, 2.3 mmol), triphosgene (113 mg, 0.4 mmol) and THF (5 mL).  
1149 Then KK054-N1 (**18**) (86 mg, 39%) was obtained as a white solid with the carbamoyl chloride  
1150 intermediate, THF (5 mL), *N,N*-diisopropylethylamine (713 mg, 5.5 mmol), 1*H*-1,2,3-triazole (63  
1151 mg, 0.9 mmol) and DMAP (cat.). <sup>1</sup>H NMR (500 MHz, CDCl<sub>3</sub>): δ 8.21 (d, *J* = 1.3 Hz, 1H), 7.75 (d,  
1152 *J* = 1.3 Hz, 1H), 7.26-7.22 (m, 2H), 6.89-6.85 (m, 2H), 4.26-3.85 (m, 4H), 3.41-3.19 (m, 4H). <sup>13</sup>C  
1153 NMR (125 MHz, CDCl<sub>3</sub>): δ 149.21, 148.00, 133.00, 129.16, 125.76, 125.43, 117.93, 49.58, 49.28,  
1154 47.67, 45.33. HRMS (*m/z*): calcd. for C<sub>13</sub>H<sub>14</sub>N<sub>5</sub>OCl [M+H]<sup>+</sup>: 292.0960; found, 292.0960.

1155

1156 **KK055-N1 (19)**: (4-(pyridin-2-yl)piperazin-1-yl)(1*H*-1,2,3-triazol-1-yl)methanone.

1157 KK055-N1 (**19**) was synthesized as the same method as compound **17**. The carbamoyl chloride  
1158 intermediate was obtained with 1-(2-pyridyl)piperazine (150 mg, 0.9 mmol), *N,N*-  
1159 diisopropylethylamine (356 mg, 2.8 mmol), triphosgene (136 mg, 0.5 mmol) and THF (5 mL).  
1160 Then KK055-N1 (**19**) (61 mg, 26%) was obtained as a white solid with the carbamoyl chloride  
1161 intermediate, THF (5 mL), *N,N*-diisopropylethylamine (356 mg, 2.8 mmol), 1*H*-1,2,3-triazole (76  
1162 mg, 1.1 mmol) and DMAP (cat.). <sup>1</sup>H NMR (500 MHz, CDCl<sub>3</sub>): δ 8.27-8.15 (m, 2H), 7.75 (d, *J* =  
1163 1.1 Hz, 1H), 7.57-7.51 (m, 1H), 6.73-6.65 (m, 2H), 4.25-3.83 (m, 4H), 3.83-3.61 (m, 4H). <sup>13</sup>C  
1164 NMR (125 MHz, CDCl<sub>3</sub>): δ 158.79, 148.19, 148.03, 137.78, 133.00, 125.42, 114.21, 107.21,  
1165 47.53, 45.27, 44.73. HRMS (*m/z*): calcd. for C<sub>12</sub>H<sub>14</sub>N<sub>6</sub>O [M+H]<sup>+</sup>: 259.1302; found, 259.1304.

1166

1167 **KK067 (20)**: The mixture of (4-(4-nitrophenyl)piperazin-1-yl)(1*H*-1,2,3-triazol-1-yl)methanone  
1168 (N1 isomer) and (4-(4-nitrophenyl)piperazin-1-yl)(2*H*-1,2,3-triazol-2-yl)methanone (N1 isomer).

1169 KK067 (**20**) was synthesized as the same method as compound **17**. The carbamoyl chloride  
1170 intermediate was obtained with 1-(4-nitrophenyl)piperazine (100 mg, 0.5 mmol), *N,N*-  
1171 diisopropylethylamine (187 mg, 1.5 mmol), triphosgene (72 mg, 0.2 mmol) and THF (5 mL).

1172 Then the KK067-N1, N2 mixture (**20**) (97 mg, 66%; NMR ratio N1-isomer:N2-isomer = 6:4) was  
1173 obtained as a yellow solid with the carbamoyl chloride intermediate, THF (5 mL), *N,N*-  
1174 diisopropylethylamine (187 mg, 1.5 mmol), 1*H*-1,2,3-triazole (40 mg, 0.6 mmol) and DMAP  
1175 (cat.).

1176 **KK067-N1**: <sup>1</sup>H NMR (500 MHz, CDCl<sub>3</sub>): δ 8.24 (d, *J* = 1.3 Hz, 1H), 8.22-8.12 (m, 2H), 7.77 (d, *J*  
1177 = 1.3 Hz, 1H), 6.92-6.82 (m, 2H), 4.32-3.91 (m, 4H), 3.69-3.53 (m, 4H).

1178 **KK067-N2**: <sup>1</sup>H-NMR (500 MHz, CDCl<sub>3</sub>): δ 8.22-8.12 (m, 2H), 7.87 (s, 2H), 6.92-6.82 (m, 2H),  
1179 4.32-3.91 (m, 4H), 3.69-3.53 (m, 4H). <sup>13</sup>C NMR (125 MHz, CDCl<sub>3</sub>): δ 154.26, 154.19, 148.86,  
1180 148.06, 139.40, 139.32, 136.46, 133.12, 125.94, 125.49, 113.15, 113.12, 106.46, 47.01. HRMS  
1181 (*m/z*): calcd. for C<sub>13</sub>H<sub>14</sub>N<sub>6</sub>O<sub>3</sub> [M+H]<sup>+</sup>: 303.1200; found, 303.1201.

1182  
1183 **KK070 (21)**: The mixture of 4-(4-(1*H*-1,2,3-triazole-1-carbonyl)piperazin-1-yl)benzotrile (N1-  
1184 isomer) and 4-(4-(2*H*-1,2,3-triazole-2-carbonyl)piperazin-1-yl)benzotrile (N2-isomer).

1185 **KK070 (21)** was synthesized as the same method as compound **17**. The carbamoyl chloride  
1186 intermediate was obtained with 4-(1-piperazinyl)benzotrile (150 mg, 0.8 mmol), *N,N*-  
1187 diisopropylethylamine (311 mg, 2.4 mmol), triphosgene (119 mg, 0.4 mmol) and THF (5 mL).  
1188 Then the KK070-N1, N2 mixture (**21**) (117mg, 52%; NMR ratio N1-isomer:N2-isomer = 87:12)  
1189 was obtained as a white solid with the carbamoyl chloride intermediate, THF (5 mL), *N,N*-  
1190 diisopropylethylamine (311 mg, 2.4 mmol), 1*H*-1,2,3-triazole (66 mg, 1.0 mmol) and DMAP  
1191 (cat.).

1192 **KK070-N1**: <sup>1</sup>H NMR (500 MHz, CDCl<sub>3</sub>): δ 8.23 (d, *J* = 1.3 Hz, 1H), 7.76 (d, *J* = 1.3 Hz, 1H),  
1193 7.59-7.51 (2H, m), 6.94-6.87 (m, 2H), 4.30-3.88 (m, 4H), 3.59-3.43 (m, 4H).

1194 **KK070-N2**: <sup>1</sup>H-NMR (500 MHz, CDCl<sub>3</sub>): δ 7.86 (s, 2H), 7.59-7.51 (m, 2H), 6.94-6.87 (m, 2H),  
1195 4.30-3.88 (m, 4H), 3.59-3.43 (m, 4H). <sup>13</sup>C NMR (125 MHz, CDCl<sub>3</sub>): δ 152.69, 148.00, 136.37,  
1196 133.60, 133.06, 125.45, 119.57, 114.64, 101.61, 47.22, 44.88. HRMS (*m/z*): calcd. for C<sub>14</sub>H<sub>14</sub>N<sub>6</sub>O  
1197 [M+H]<sup>+</sup>: 283.1302; found, 283.1303.

1198  
1199 **KK071 (22)**: The mixture of (4-cyclohexylpiperazin-1-yl)(1*H*-1,2,3-triazol-1-yl)methanone (N1-  
1200 isomer) and (4-cyclohexylpiperazin-1-yl)(2*H*-1,2,3-triazol-2-yl)methanone (N2-isomer).

1201 **KK071 (22)** was synthesized as the same method as compound **17**. The carbamoyl chloride  
1202 intermediate was obtained with 1-cyclohexylpiperazine (150 mg, 0.9 mmol), *N,N*-  
1203 diisopropylethylamine (346 mg, 2.7 mmol), triphosgene (132 mg, 0.5 mmol) and THF (5 mL).  
1204 Then the KK071-N1, N2 mixture (**22**) (169 mg, 72%, NMR ratio N1-isomer:N2-isomer = 64:36)  
1205 was obtained as colorless oil with the carbamoyl chloride intermediate, THF (5 mL), *N,N*-



1206 diisopropylethylamine (346 mg, 2.7 mmol), 1*H*-1,2,3-triazole (74 mg, 1.1 mmol) and DMAP  
1207 (cat.).  
1208 **KK071-N1**: <sup>1</sup>H-NMR (500 MHz, CDCl<sub>3</sub>): δ 8.17 (d, *J* = 1.3 Hz, 1H), 7.73 (d, *J* = 1.3 Hz, 1H),  
1209 4.01-3.61 (m, 4H), 2.81-2.59 (m, 4H), 2.43-2.25 (m, 2H), 1.93-1.75 (m, 4H), 1.70-1.56 (m, 1H),  
1210 1.36-0.99 (m, 4H).  
1211 **KK071-N2**: <sup>1</sup>H-NMR (500 MHz, CDCl<sub>3</sub>): δ 7.82 (s, 2H), 4.01-3.61 (m, 4H), 2.81-2.59 (m, 4H),  
1212 2.43-2.25 (m, 2H), 1.93-1.75 (m, 4H), 1.70-1.56 (m, 1H), 1.36-0.99 (m, 4H). <sup>13</sup>C NMR (125 MHz,  
1213 CDCl<sub>3</sub>): δ 148.88, 147.96, 135.87, 132.84, 125.27, 63.46, 49.06, 48.39, 45.97, 28.81, 26.16, 25.73.  
1214 HRMS (*m/z*): calcd. for C<sub>13</sub>H<sub>21</sub>N<sub>5</sub>O [M+H]<sup>+</sup>: 264.1819; found, 264.1830.  
1215  
1216 **KK072 (23)**: The mixture of (4-(*p*-tolyl)piperazin-1-yl)(1*H*-1,2,3-triazol-1-yl)methanone (N1-  
1217 isomer) and (4-(*p*-tolyl)piperazin-1-yl)(2*H*-1,2,3-triazol-2-yl)methanone (N2-isomer)  
1218 **KK072 (23)** was synthesized as the same method as compound **17**. The carbamoyl chloride  
1219 intermediate was obtained with 1-(4-methylphenyl)piperazine (150 mg, 0.9 mmol), *N,N*-  
1220 diisopropylethylamine (330 mg, 2.6 mmol), triphosgene (71 mg, 1.0 mmol) and THF (5 mL).  
1221 Then the **KK072-N1, N2** mixture (**23**) (231 mg, quant, NMR ratio N1-isomer:N2-isomer = 69:31)  
1222 was obtained as a white solid with the carbamoyl chloride intermediate, THF (5 mL), *N,N*-  
1223 diisopropylethylamine (330 mg, 2.6 mmol), 1*H*-1,2,3-triazole (71 mg, 1.0 mmol) and DMAP  
1224 (cat.).  
1225 **KK072-N1**: <sup>1</sup>H NMR (500 MHz, CDCl<sub>3</sub>): δ 8.20 (d, *J* = 1.1 Hz, 1H), 7.74 (d, *J* = 1.1 Hz, 1H),  
1226 7.13-7.09 (m, 2H), 6.90-6.84 (m, 2H), 4.25-3.80 (m, 4H), 3.45-3.10 (m, 4H), 2.29 (s, 3H).  
1227 **KK072-N2**: <sup>1</sup>H NMR (500 MHz, CDCl<sub>3</sub>): δ 7.84 (s, 1H), 7.13-7.09 (m, 2H), 6.90-6.84 (m, 2H),  
1228 4.25-3.80 (m, 4H), 3.45-3.10 (m, 4H), 2.29 (s, 3H). <sup>13</sup>C NMR (125 MHz, CDCl<sub>3</sub>): δ 148.57,  
1229 148.47, 148.04, 136.11, 132.95, 130.48, 130.42, 129.80, 125.41, 117.09, 49.92, 47.74, 45.47,  
1230 20.42. HRMS (*m/z*): calcd. for C<sub>14</sub>H<sub>17</sub>N<sub>5</sub>O [M+H]<sup>+</sup>: 272.1506; found, 272.1517.  
1231  
1232 **KK073 (24)**: The mixture of (1*H*-1,2,3-triazol-1-yl)(4-(4-(trifluoromethyl)phenyl)piperazin-1-  
1233 yl)methanone (N1-isomer) and (2*H*-1,2,3-triazol-2-yl)(4-(4-(trifluoromethyl)phenyl)piperazin-1-  
1234 yl)methanone (N2-isomer).  
1235 **KK073 (24)** was synthesized as the same method as compound **17**. The carbamoyl chloride  
1236 intermediate was obtained with 1-(4-trifluoromethylphenyl)piperazine (150 mg, 0.7 mmol), *N,N*-  
1237 diisopropylethylamine (253 mg, 2.0 mmol), triphosgene (97 mg, 0.3 mmol) and THF (5 mL).  
1238 Then the **KK073-N1, N2** mixture (**24**) (188 mg, 89%, NMR ratio N1-isomer:N2-isomer = 73:17)  
1239 was obtained as a white solid with the carbamoyl chloride intermediate, THF (5 mL), *N,N*-



1240 diisopropylethylamine (253 mg, 2.0 mmol), 1*H*-1,2,3-triazole (54 mg, 0.8 mmol) and DMAP  
1241 (cat.).

1242 **KK073-N1**: <sup>1</sup>H NMR (500 MHz, CDCl<sub>3</sub>): δ 8.22 (d, *J* = 1.4 Hz, 1H), 7.76 (d, *J* = 1.4 Hz, 1H),  
1243 7.56-7.50 (m, 2H), 6.98-6.94 (m, 2H), 3.95-4.18 (m, 4H), 3.45-3.45 (m, 4H).

1244 **KK073-N2**: <sup>1</sup>H NMR (500 MHz, CDCl<sub>3</sub>): δ 7.86 (s, 1H), 7.56-7.50 (m, 2H), 6.98-6.94 (m, 2H),  
1245 4.18-3.95 (m, 4H), 3.56-3.32 (m, 4H). <sup>13</sup>C NMR (125 MHz, CDCl<sub>3</sub>): δ 152.72, 152.64, 148.90,  
1246 148.06, 136.31, 133.07, 127.74, 126.59, 125.59, 125.48, 123.44, 121.87, 115.18, 77.28, 77.03,  
1247 76.77, 48.31, 47.49, 45.12. HRMS (*m/z*): calcd. for C<sub>14</sub>H<sub>14</sub>N<sub>5</sub>OF<sub>3</sub> [M+H]<sup>+</sup>: 326.1223; found,  
1248 326.1233.

1249

1250 **KK075 (25)**: The mixture of (4-benzhydrylpiperazin-1-yl)(1*H*-1,2,3-triazol-1-yl)methanone (N1-  
1251 isomer) and (4-benzhydrylpiperazin-1-yl)(2*H*-1,2,3-triazol-2-yl)methanone (N2-isomer).

1252 **KK075 (25)** was synthesized as the same method as compound **17**. The carbamoyl chloride  
1253 intermediate was obtained with 1-(diphenylmethyl)piperazine (150 mg, 0.6 mmol), *N,N*-  
1254 diisopropylethylamine (230 mg, 1.8 mmol), triphosgene (97 mg, 0.3 mmol) and THF (5 mL).  
1255 Then the **KK075-N1, N2** mixture (**25**) (186 mg, 90%, NMR ratio N1-isomer:N2-isomer = 65:35)  
1256 was obtained as a white solid with the carbamoyl chloride intermediate, THF (5 mL), *N,N*-  
1257 diisopropylethylamine (230 mg, 1.8 mmol), 1*H*-1,2,3-triazole (49 mg, 0.7 mmol) and DMAP  
1258 (cat.).

1259 **KK075-N1**: <sup>1</sup>H NMR (500 MHz, CDCl<sub>3</sub>): δ 8.13 (d, *J* = 1.1 Hz, 1H), 7.69 (d, *J* = 1.1 Hz, 1H), 7.  
1260 45-7.39 (m, 4H), 7.32-7.25 (m, 4H), 7.23-7.17 (2H), 4.31 (s, 1H), 4.07-3.55 (m, 4H), 2.69-2.36  
1261 (m, 4H).

1262 **KK075-N2**: <sup>1</sup>H NMR (500 MHz, CDCl<sub>3</sub>): δ 7.77 (s, 2H), 7.45-7.39 (m, 4H), 7.32-7.25 (m, 4H),  
1263 7.23-7.17 (2H), 4.29 (s, 1H), 4.07-3.55 (m, 4H), 2.69-2.36 (m, 4H). <sup>13</sup>C NMR (125 MHz, CDCl<sub>3</sub>):  
1264 δ 148.91, 148.01, 141.91, 141.76, 135.86, 132.84, 128.65, 127.83, 127.26, 127.22, 125.24, 75.84,  
1265 75.77, 51.83, 51.28, 47.92, 45.48. HRMS (*m/z*): calcd. for C<sub>20</sub>H<sub>21</sub>N<sub>5</sub>O [M+H]<sup>+</sup>: 348.1819; found,  
1266 348.1834.

1267

1268 **KK094 (26)**: The mixture of indolin-1-yl(1*H*-1,2,3-triazol-1-yl)methanone (N1-isomer) and  
1269 indolin-1-yl(2*H*-1,2,3-triazol-2-yl)methanone (N2-isomer).

1270 **KK094 (26)** was synthesized as the same method as compound **17**. The carbamoyl chloride  
1271 intermediate was obtained with indoline (400 mg, 3.4 mmol), *N,N*-diisopropylethylamine (1.301 g,  
1272 10.1 mmol), triphosgene (498 mg, 1.7 mmol) and THF (5 mL). Then the **KK094-N1, N2** mixture  
1273 (**26**) (675 mg, 94%, NMR ratio N1-isomer:N2-isomer = 6:4) was obtained as a white solid with

1274 the carbamoyl chloride intermediate, THF (10 mL), *N,N*-diisopropylethylamine (1.301 g, 10.1  
1275 mmol), 1*H*-1,2,3-triazole (49 mg, 0.7 mmol) and DMAP (cat.). Then the mixture was further  
1276 purified on a silica gel column (Hexane:CH<sub>2</sub>Cl<sub>2</sub>:EtOAc = 1:4:0.4 to 0:4:0.4) giving KK094-N1  
1277 (190 mg, 26%) as a white solid and KK094-N2 (97 mg, 14%) as a white solid.

1278 **KK094-N1**: <sup>1</sup>H NMR (500 MHz, CDCl<sub>3</sub>): δ 8.36 (d, *J* = 1.1 Hz, 1H), 8.11 (br s, 1H), 7.78 (d, *J* =  
1279 1.1 Hz, 1H), 7.33-7.27 (m, 2H), 7.16 (t, *J* = 7.4 Hz, 1H), 4.67 (t, *J* = 8.3 Hz, 2H), 3.26 (t, *J* = 8.3  
1280 Hz, 2H). <sup>13</sup>C NMR (125 MHz, CDCl<sub>3</sub>): δ 145.92, 141.88, 132.91, 132.19, 127.68, 125.45, 125.00,  
1281 124.96, 117.49, 51.77, 28.55. HRMS (*m/z*): calcd. for C<sub>11</sub>H<sub>10</sub>N<sub>4</sub>O, [M+H]<sup>+</sup>: 215.0927; found,  
1282 215.0927.

1283 **KK094-N2**: <sup>1</sup>H NMR (500 MHz, CDCl<sub>3</sub>): δ 8.10 (s, 1H), 7.88 (s, 2H), 7.35-7.20 (m, 2H), 7.13 (t,  
1284 *J* = 7.4 Hz, 1H), 4.47 (t, *J* = 8.3 Hz, 2H), 3.22 (t, *J* = 8.3 Hz, 2H). <sup>13</sup>C NMR (125 MHz, CDCl<sub>3</sub>): δ  
1285 146.35, 141.95, 136.27, 132.03, 127.67, 125.04, 124.84, 117.48, 51.39, 28.45. HRMS (*m/z*): calcd.  
1286 for C<sub>11</sub>H<sub>10</sub>N<sub>4</sub>O [M+Na]<sup>+</sup>: 237.0747; found, 237.0757.

1287

1288 **KK099 (27)**: The mixture of isoindolin-2-yl(1*H*-1,2,3-triazol-1-yl)methanone (N1-isomer) and  
1289 isoindolin-2-yl(2*H*-1,2,3-triazol-2-yl)methanone (N2-isomer).

1290 **KK099 (27)** was synthesized as the same method as compound **17**. The carbamoyl chloride  
1291 intermediate was obtained with isoindoline (200 mg, 1.7 mmol), *N,N*-diisopropylethylamine (651  
1292 mg, 5.0 mmol), triphosgene (249 mg, 0.9 mmol) and THF (5 mL). Then the KK099-N1, N2  
1293 mixture (**27**) (675 mg, 94%, NMR ratio N1-isomer:N2-isomer = 6:4) was obtained as a white  
1294 solid with the carbamoyl chloride intermediate, THF (10 mL), *N,N*-diisopropylethylamine (651  
1295 mg, 5.0 mmol), 1*H*-1,2,3-triazole (116 mg, 2.0 mmol) and DMAP (cat.). Then the mixture was  
1296 further purified on a silica gel column (Hexane:CH<sub>2</sub>Cl<sub>2</sub>:EtOAc = 1:4:0.4 to 0:4:0.4) giving  
1297 KK099-N1 (93 mg, 26%) as a white solid and KK099-N2 (86 mg, 24%) as a white solid.

1298 **KK099-N1**: <sup>1</sup>H NMR (500 MHz, CDCl<sub>3</sub>): δ 8.36 (d, *J* = 1.1 Hz, 1H), 8.11 (br s, 1H), 7.78 (d, *J* =  
1299 1.1 Hz, 1H), 7.33-7.27 (m, 2H), 7.16 (t, *J* = 7.4 Hz, 1H), 4.67 (t, *J* = 8.3 Hz, 2H), 3.26 (t, *J* = 8.3  
1300 Hz, 2H). <sup>13</sup>C NMR (125 MHz, CDCl<sub>3</sub>): δ 8.40 (d, *J* = 1.3 Hz, 1H), 7.77 (d, *J* = 1.3 Hz, 1H), 7.38-  
1301 7.28 (m, 4H), 5.47 (s, 2H), 5.11 (s, 2H). <sup>13</sup>C NMR (125 MHz, CDCl<sub>3</sub>): δ 147.1, 136.4, 134.0,  
1302 132.8, 128.0, 127.9, 124.9, 122.7, 122.6, 56.0, 55.1. HRMS (*m/z*): calcd. for C<sub>11</sub>H<sub>10</sub>N<sub>4</sub>O, [M+H]<sup>+</sup>:  
1303 215.0927; found, 215.0920.

1304 **KK099-N2**: <sup>1</sup>H NMR (500 MHz, CDCl<sub>3</sub>): δ 7.89 (s, 2H), 7.37-7.24 (m, 5H), 5.31 (s, 2H), 5.13 (s,  
1305 2H). <sup>13</sup>C NMR (125 MHz, CDCl<sub>3</sub>): δ 147.7, 136.4, 136.3, 134.6, 127.9, 127.8, 122.6, 122.5, 55.8,  
1306 55.0. HRMS (*m/z*): calcd. for C<sub>11</sub>H<sub>10</sub>N<sub>4</sub>O [M+Na]<sup>+</sup>: 237.0747; found, 237.0749.

1307

1308 **KK122 (28)**: (1*H*-imidazol-1-yl)(indolin-1-yl)methanone.  
1309 1,1'-carbonyldiimidazole (180 mg, 1.1 mmol) was added to the solution of indoline (100 mg, 0.8  
1310 mmol) in THF (5 mL) and stirred overnight at rt. Then the solvent was removed under vacuum and  
1311 the resulting residue was dissolved in EtOAc and water and pH was adjusted to 7 with 0.5 M HCl,  
1312 and extracted with EtOAc and water twice. The EtOAc layer was combined and the solvent was  
1313 removed under vacuum and the resulting residue was purified on a silica gel column  
1314 (EtOAc:MeOH = 1:0 to 9:1) giving **KK122 (28)** (147 mg, 82%) as a white solid.  
1315 <sup>1</sup>H NMR (500 MHz, CDCl<sub>3</sub>): δ 8.02 (m, 1H), 7.41 (br s, 1H), 7.36 (m, 1H), 7.26 (d, *J* = 7.5 Hz,  
1316 1H), 7.20 (t, *J* = 7.5 Hz, 1H), 7.13-7.13 (m, 1H), 7.09 (td, *J* = 7.5, 0.8 Hz, 1H), 4.19 (t, *J* = 8.2 Hz,  
1317 2H), 3.20 (t, *J* = 8.2 Hz, 2H). <sup>13</sup>C NMR (125 MHz, CDCl<sub>3</sub>): δ 148.16, 141.30, 136.58, 131.91,  
1318 129.81, 127.56, 125.07, 124.87, 117.45, 116.44, 50.97, 28.30.

1319  
1320 **Compound 29**: (2-methylindolin-1-yl)(1*H*-1,2,3-triazol-1-yl)methanone.  
1321 **Compound 29** was synthesized as the same method as compound **17**. The carbamoyl chloride  
1322 intermediate was obtained with 2-methylindoline (300 mg, 2.3 mmol), *N,N*-diisopropylethylamine  
1323 (2.08 g, 16.1 mmol), triphosgene (267 mg, 0.9 mmol) and THF (5 mL). Then the  
1324 compound **29** (55 mg, 11%) was obtained as colorless oil with the carbamoyl chloride  
1325 intermediate, THF (5 mL), *N,N*-diisopropylethylamine (873 mg, 6.8 mmol), 1*H*-1,2,3-triazole  
1326 (187 mg, 2.7 mmol) and DMAP (cat.). <sup>1</sup>H NMR (500 MHz, CDCl<sub>3</sub>): δ 8.35 (d, *J* = 1.1 Hz, 1H),  
1327 8.09 (br s, 1H), 7.78 (d, *J* = 1.1 Hz, 1H), 7.38-7.27 (m, 2H), 7.17 (t, *J* = 7.2 Hz, 1H), 5.70 (m, 1H),  
1328 3.53 (dd, *J* = 15.5, 9.2 Hz, 1H), 2.78 (d, *J* = 15.5 Hz, 1H), 1.27 (d, *J* = 6.3 Hz, 3H). <sup>13</sup>C NMR  
1329 (125 MHz, CDCl<sub>3</sub>): δ 145.76, 140.88, 132.87, 131.29, 127.69, 125.54, 125.67, 125.13, 118.00,  
1330 58.43, 36.47, 21.56. HRMS (*m/z*): calcd. for C<sub>12</sub>H<sub>12</sub>N<sub>4</sub>O [M+Na]<sup>+</sup>: 251.0903; found, 251.904.

1331  
1332 **Compound 30**: (3-methylindolin-1-yl)(1*H*-1,2,3-triazol-1-yl)methanone.  
1333 **Compound 30** was synthesized as the same method as compound **17**. The carbamoyl chloride  
1334 intermediate was obtained with 3-methylindoline (713 mg, 5.4 mmol), *N,N*-diisopropylethylamine  
1335 (2.08 g, 16.1 mmol), triphosgene (635 mg, 2.1 mmol) and THF (5 mL). Then the compound **30**  
1336 (509 mg, 42%) was obtained as a white solid with the carbamoyl chloride intermediate, THF (5  
1337 mL), *N,N*-diisopropylethylamine (2.08 g, 16.1 mmol), 1*H*-1,2,3-triazole (187 mg, 2.7 mmol) and  
1338 DMAP (cat.). <sup>1</sup>H NMR (500 MHz, CDCl<sub>3</sub>): δ 8.37 (d, *J* = 1.1 Hz, 1H), 8.09 (br s, 1H), 7.78 (d, *J*  
1339 = 1.1 Hz, 1H), 7.35-7.22 (m, 2H), 7.19 (t, *J* = 7.4 Hz, 1H), 4.82 (dd, *J* = 11.5, 9.7 Hz, 1H), 4.22  
1340 (dd, *J* = 11.5, 6.9 Hz, 1H), 3.62-3.51 (m, 1H), 1.39 (d, *J* = 6.9 Hz, 3H). <sup>13</sup>C NMR (125 MHz,  
1341 CDCl<sub>3</sub>): δ 145.81, 141.43, 137.37, 132.92, 127.85, 125.60, 124.97, 123.81, 117.38, 59.55, 35.28,

1342 19.64. HRMS ( $m/z$ ): calcd. for C<sub>12</sub>H<sub>12</sub>N<sub>4</sub>O [M+H]<sup>+</sup>: 229.1084; found, 229.1085.

1343  
1344 **Compound 31:** (4-nitroindolin-1-yl)(1*H*-1,2,3-triazol-1-yl)methanone.

1345 Compound **31** was synthesized as the same method as compound **17**. The carbamoyl chloride  
1346 intermediate was obtained with 4-nitroindoline (837 mg, 5.1 mmol), *N,N*-diisopropylethylamine  
1347 (1.98 g, 15.3 mmol), triphosgene (605 mg, 2.0 mmol) and THF (5 mL). Then the compound **31**  
1348 (64 mg, 5%) was obtained as a yellow solid with the carbamoyl chloride intermediate, THF (5  
1349 mL), *N,N*-diisopropylethylamine (1.98 g, 15.3 mmol), 1*H*-1,2,3-triazole (423 mg, 6.1 mmol) and  
1350 DMAP (cat.). <sup>1</sup>H NMR (500 MHz, CDCl<sub>3</sub>): δ 8.45 (br s, 1H), 8.39 (d, *J* = 1.1 Hz, 1H), 8.02 (d, *J*  
1351 = 8.3 Hz, 1H), 7.81 (d, *J* = 1.1 Hz, 1H), 7.51 (t, *J* = 8.3 Hz, 1H), 4.80 (t, *J* = 8.4 Hz, 2H), 3.77 (t, *J*  
1352 = 8.4 Hz, 2H). <sup>13</sup>C NMR (125 MHz, CDCl<sub>3</sub>): δ 146.34, 145.26, 144.67, 133.19, 129.57, 129.12,  
1353 125.10, 122.82, 120.54, 52.08, 29.78. HRMS ( $m/z$ ): calcd. for C<sub>11</sub>H<sub>9</sub>N<sub>5</sub>O<sub>3</sub> [M+H]<sup>+</sup>: 260.0778;  
1354 found, 260.0781.

1355  
1356 **Compound 32:** (4-chloroindolin-1-yl)(1*H*-1,2,3-triazol-1-yl)methanone.

1357 Compound **32** was synthesized as the same method as compound **17**. The carbamoyl chloride  
1358 intermediate was obtained with 4-chloroindoline (1.00 g, 6.5 mmol), *N,N*-diisopropylethylamine  
1359 (2.52 g, 19.5 mmol), triphosgene (773 mg, 2.6 mmol) and THF (5 mL). Then the compound **32**  
1360 (47 mg, 3%) was obtained as a white solid with the carbamoyl chloride intermediate, THF (5 mL),  
1361 *N,N*-diisopropylethylamine (2.52 g, 19.5 mmol), 1*H*-1,2,3-triazole (540 mg, 7.8 mmol) and  
1362 DMAP (cat.). <sup>1</sup>H NMR (500 MHz, CDCl<sub>3</sub>): δ 8.36 (d, *J* = 1.1 Hz, 1H), 8.01 (br s, 1H), 7.78 (d, *J* =  
1363 1.1 Hz, 1H), 7.28-7.22 (m, 2H), 7.15 (d, *J* = 7.4 Hz, 1H), 4.72 (t, *J* = 8.3 Hz, 2H), 3.28 (t, *J* = 8.3  
1364 Hz, 2H). <sup>13</sup>C NMR (125 MHz, CDCl<sub>3</sub>): δ 146.03, 143.22, 136.51, 133.00, 130.88, 129.18, 125.34,  
1365 125.02, 115.72, 51.63, 28.05. HRMS ( $m/z$ ): calcd. for C<sub>11</sub>H<sub>9</sub>N<sub>4</sub>OCl [M+H]<sup>+</sup>: 249.0538; found,  
1366 249.0538.

1367  
1368 **Compound 33:** (4-methylindolin-1-yl)(1*H*-1,2,3-triazol-1-yl)methanone.

1369 Compound **33** was synthesized as the same method as compound **17**. The carbamoyl chloride  
1370 intermediate was obtained with 4-methylindoline (730 mg, 5.5 mmol), *N,N*-diisopropylethylamine  
1371 (2.13 g, 16.4 mmol), triphosgene (651 mg, 2.2 mmol) and THF (5 mL). Then the compound **33**  
1372 (423 mg, 34%) was obtained as a white solid with the carbamoyl chloride intermediate, THF (5  
1373 mL), *N,N*-diisopropylethylamine (2.13g, 16.4mmol), 1*H*-1,2,3-triazole (454 mg, 6.6 mmol) and  
1374 DMAP (cat.). <sup>1</sup>H NMR (500 MHz, CDCl<sub>3</sub>): δ 8.36 (d, *J* = 1.1 Hz, 1H), 7.95 (br s, 1H), 7.77 (d, *J* =  
1375 1.1 Hz, 1H), 7.21 (t, *J* = 7.7 Hz, 1H), 6.99 (d, *J* = 7.4 Hz, 1H), 4.68 (t, *J* = 8.2 Hz, 2H), 3.15 (t, *J* =

1376 8.2 Hz, 2H), 2.29 (s, 3H).  $^{13}\text{C}$  NMR (125 MHz,  $\text{CDCl}_3$ ):  $\delta$  145.91, 141.60, 134.48, 132.87, 130.96,  
1377 127.81, 126.40, 124.95, 114.90, 51.68, 27.46, 18.62. HRMS ( $m/z$ ): calcd. for  $\text{C}_{12}\text{H}_{12}\text{N}_4\text{O}$ ,  
1378  $[\text{M}+\text{Na}]^+$ : 251.0903; found, 251.0907.

1379

1380 **Compound 34:** (5-nitroindolin-1-yl)(1*H*-1,2,3-triazol-1-yl)methanone.

1381 Compound **34** was synthesized as the same method as compound **17**. The carbamoyl chloride  
1382 intermediate was obtained with 5-nitroindoline (1.00 g, 6.1 mmol), *N,N*-diisopropylethylamine  
1383 (2.36 g, 18.3 mmol), triphosgene (723 mg, 2.4 mmol) and THF (5 mL). Then the compound **34**  
1384 (143 mg, 9%) was obtained as a yellow solid with the carbamoyl chloride intermediate, THF (5  
1385 mL), *N,N*-diisopropylethylamine (2.36 g, 18.3 mmol), 1*H*-1,2,3-triazole (505 mg, 7.3 mmol) and  
1386 DMAP (cat.).  $^1\text{H}$  NMR (500 MHz,  $\text{CDCl}_3$ ):  $\delta$  8.40 (d,  $J = 1.3$  Hz, 1H), 8.26-8.19 (m, 2H), 8.16 (t,  
1387  $J = 1.4$  Hz, 1H), 7.81 (d,  $J = 1.1$  Hz, 1H), 4.84 (t,  $J = 8.5$  Hz, 2H), 3.38 (t,  $J = 8.5$  Hz, 2H).  $^{13}\text{C}$   
1388 NMR (125 MHz,  $\text{CDCl}_3$ ):  $\delta$  147.65, 146.31, 145.04, 133.61, 133.26, 125.22, 124.44, 120.61,  
1389 117.25, 52.64, 28.12. HRMS ( $m/z$ ): calcd. for  $\text{C}_{11}\text{H}_9\text{N}_5\text{O}_3$   $[\text{M}+\text{Na}]^+$ : 282.0598; found, 282.0596.

1390

1391 **Compound 35:** (5-chloroindolin-1-yl)(1*H*-1,2,3-triazol-1-yl)methanone.

1392 Compound **35** was synthesized as the same method as compound **17**. The carbamoyl chloride  
1393 intermediate was obtained with 5-chloroindoline (1.00 g, 6.5 mmol), *N,N*-diisopropylethylamine  
1394 (2.52 g, 19.5 mmol), triphosgene (773 mg, 2.6 mmol) and THF (5 mL). Then the compound **35**  
1395 (450 mg, 28%) was obtained as a white solid with the carbamoyl chloride intermediate, THF (5  
1396 mL), *N,N*-diisopropylethylamine (2.52 g, 19.5 mmol), 1*H*-1,2,3-triazole (540 mg, 7.8 mmol) and  
1397 DMAP (cat.).  $^1\text{H}$  NMR (500 MHz,  $\text{CDCl}_3$ ):  $\delta$  8.36 (d,  $J = 1.1$  Hz, 1H), 8.04 (br s, 1H), 7.77 (d,  $J =$   
1398 1.1 Hz, 1H), 4.70 (t,  $J = 8.3$  Hz, 2H), 3.25 (t,  $J = 8.3$  Hz, 2H).  $^{13}\text{C}$  NMR (125 MHz,  $\text{CDCl}_3$ ):  $\delta$   
1399 145.88, 140.65, 134.03, 132.98, 130.51, 127.73, 125.17, 124.99, 118.39, 51.95, 28.37. HRMS  
1400 ( $m/z$ ): calcd. for  $\text{C}_{11}\text{H}_9\text{N}_4\text{OCl}$   $[\text{M}+\text{H}]^+$ : 249.0538; found, 249.0538.

1401

1402 **Compound 35:** (5-chloroindolin-1-yl)(1*H*-1,2,3-triazol-1-yl)methanone.

1403 Compound **35** was synthesized as the same method as compound **17**. The carbamoyl chloride  
1404 intermediate was obtained with 5-chloroindoline (1.00 g, 6.5 mmol), *N,N*-diisopropylethylamine  
1405 (2.52 g, 19.5 mmol), triphosgene (773 mg, 2.6 mmol) and THF (5 mL). Then the compound **35**  
1406 (450 mg, 28%) was obtained as a white solid with the carbamoyl chloride intermediate, THF (5  
1407 mL), *N,N*-diisopropylethylamine (2.52 g, 19.5 mmol), 1*H*-1,2,3-triazole (540 mg, 7.8 mmol) and  
1408 DMAP (cat.).  $^1\text{H}$  NMR (500 MHz,  $\text{CDCl}_3$ ):  $\delta$  8.36 (d,  $J = 1.1$  Hz, 1H), 8.04 (br s, 1H), 7.77 (d,  $J =$   
1409 1.1 Hz, 1H), 4.70 (t,  $J = 8.3$  Hz, 2H), 3.25 (t,  $J = 8.3$  Hz, 2H).  $^{13}\text{C}$  NMR (125 MHz,  $\text{CDCl}_3$ ):  $\delta$

1410 145.88, 140.65, 134.03, 132.98, 130.51, 127.73, 125.17, 124.99, 118.39, 51.95, 28.37. HRMS  
1411 ( $m/z$ ): calcd. for C<sub>11</sub>H<sub>9</sub>N<sub>4</sub>OCl [M+H]<sup>+</sup>: 249.0538; found, 249.0538.

1412

1413 **Compound 36:** (5-methylindolin-1-yl)(1*H*-1,2,3-triazol-1-yl)methanone.

1414 Compound **36** was synthesized as the same method as compound **17**. The carbamoyl chloride  
1415 intermediate was obtained with 5-methylindoline (300 mg, 2.3 mmol), *N,N*-diisopropylethylamine  
1416 (873 mg, 6.8 mmol), triphosgene (334 mg, 1.1 mmol) and THF (5 mL). Then the compound **35**  
1417 (90 mg, 18%) was obtained as a white solid with the carbamoyl chloride intermediate, THF (5  
1418 mL), *N,N*-diisopropylethylamine (873 mg, 6.8 mmol), 1*H*-1,2,3-triazole (187 mg, 2.7 mmol) and  
1419 DMAP (cat.). <sup>1</sup>H NMR (500 MHz, CDCl<sub>3</sub>): δ 8.35 (d, *J* = 1.1 Hz, 1H), 7.99 (br s, 1H), 7.76 (d, *J* =  
1420 1.1 Hz, 1H), 7.14-7.05 (m, 2H), 4.65 (t, *J* = 8.3 Hz, 2H), 3.21 (t, *J* = 8.3 Hz, 2H), 2.36 (s, 3H). <sup>13</sup>C  
1421 NMR (125 MHz, CDCl<sub>3</sub>): δ 145.72, 139.54, 135.32, 132.84, 132.25, 128.18, 125.60, 124.90,  
1422 117.15, 51.84, 28.50, 21.04. HRMS ( $m/z$ ): calcd. for C<sub>12</sub>H<sub>12</sub>N<sub>4</sub>O [M+Na]<sup>+</sup>: 251.0903; found,  
1423 251.0910.

1424

1425 **Compound 37:** (6-nitroindolin-1-yl)(1*H*-1,2,3-triazol-1-yl)methanone.

1426 Compound **37** was synthesized as the same method as compound **17**. The carbamoyl chloride  
1427 intermediate was obtained with 6-nitroindoline (1.00 g, 6.1 mmol), *N,N*-diisopropylethylamine  
1428 (2.36 g, 18.3 mmol), triphosgene (723 mg, 2.4 mmol) and THF (5 mL). Then the compound **37**  
1429 (531 mg, 34%) was obtained as a yellow solid with the carbamoyl chloride intermediate, THF (5  
1430 mL), *N,N*-diisopropylethylamine (2.36 g, 18.3 mmol), 1*H*-1,2,3-triazole (505 mg, 7.3 mmol) and  
1431 DMAP (cat.). <sup>1</sup>H NMR (500 MHz, CDCl<sub>3</sub>): δ 8.94 (br s, 1H), 8.42 (d, *J* = 1.1 Hz, 1H), 8.06 (dd, *J* =  
1432 8.2, 2.0 Hz, 1H), 7.80 (d, *J* = 1.1 Hz, 1H), 7.42 (d, *J* = 8.2 Hz, 1H), 4.85 (t, *J* = 8.3 Hz, 2H),  
1433 3.38 (t, *J* = 8.3 Hz, 2H). <sup>13</sup>C NMR (125 MHz, CDCl<sub>3</sub>): δ 148.03, 146.07, 143.21, 139.34, 133.17,  
1434 125.20, 125.12, 120.91, 112.74, 52.38, 28.62. HRMS ( $m/z$ ): calcd. for C<sub>11</sub>H<sub>9</sub>N<sub>5</sub>O<sub>3</sub> [M+H]<sup>+</sup>:  
1435 260.0778; found, 260.0780.

1436

1437 **Compound 38:** (6-chloroindolin-1-yl)(1*H*-1,2,3-triazol-1-yl)methanone.

1438 Compound **38** was synthesized as the same method as compound **17**. The carbamoyl chloride  
1439 intermediate was obtained with 6-chloro-2,3-dihydro-1*H*-indole (376 mg, 2.5 mmol), *N,N*-  
1440 diisopropylethylamine (949mg, 7.3mmol), triphosgene (291 mg, 1.0 mmol) and THF (5 mL).  
1441 Then the compound **38** (164 mg, 27%) was obtained as a white solid with the carbamoyl chloride  
1442 intermediate, THF (5 mL), *N,N*-diisopropylethylamine (949mg, 7.3mmol), 1*H*-1,2,3-triazole (203  
1443 mg, 2.9 mmol) and DMAP (cat.). <sup>1</sup>H NMR (500 MHz, CDCl<sub>3</sub>): δ 8.37 (d, *J* = 1.3 Hz, 1H), 8.14



1444 (br s, 1H), 7.78 (d,  $J = 1.3$  Hz, 1H), 7.19 (d,  $J = 8.0$  Hz, 1H), 7.13 (dd,  $J = 8.0, 1.7$  Hz, 1H), 4.72  
1445 (t,  $J = 8.3$  Hz, 2H), 3.23 (t,  $J = 8.3$  Hz, 2H).  $^{13}\text{C}$  NMR (125 MHz,  $\text{CDCl}_3$ ):  $\delta$  145.92, 143.09,  
1446 133.34, 133.01, 130.60, 125.60, 125.46, 125.07, 117.93, 52.37, 28.14. HRMS ( $m/z$ ): calcd. for  
1447  $\text{C}_{11}\text{H}_9\text{N}_4\text{OCl}$   $[\text{M}+\text{H}]^+$ : 249.0538; found, 249.0541.

1448

1449 **Compound 39:** (6-methylindolin-1-yl)(1*H*-1,2,3-triazol-1-yl)methanone.

1450 Compound **39** was synthesized as the same method as compound **17**. The carbamoyl chloride  
1451 intermediate was obtained with 6-methylindoline (149 mg, 1.1 mmol), *N,N*-diisopropylethylamine  
1452 (434 mg, 3.4 mmol), triphosgene (133 mg, 0.4 mmol) and THF (5 mL). Then the compound **38**  
1453 (164 mg, 27%) was obtained as a white solid with the carbamoyl chloride intermediate, THF (5  
1454 mL), *N,N*-diisopropylethylamine (434 mg, 3.4 mmol), 1*H*-1,2,3-triazole (93 mg, 1.3 mmol) and  
1455 DMAP (cat.).  $^1\text{H}$  NMR (500 MHz,  $\text{CDCl}_3$ ):  $\delta$  8.35 (d  $J = 1.1$  Hz, 1H), 7.94 (br s, 1H), 7.70 (d,  $J =$   
1456 1.1 Hz, 1H), 7.16 (d,  $J = 7.5$  Hz, 1H), 6.97 (d,  $J = 7.5$  Hz, 1H), 4.65 (t,  $J = 8.5$  Hz, 2H), 3.16 (t,  $J =$   
1457 8.5 Hz, 2H), 2.40 (s, 3H).  $^{13}\text{C}$  NMR (125 MHz,  $\text{CDCl}_3$ ):  $\delta$  145.88, 141.99, 137.70, 132.88,  
1458 129.23, 126.21, 124.92, 124.58, 118.09, 52.13, 28.21, 21.62. HRMS ( $m/z$ ): calcd. for  
1459  $\text{C}_{12}\text{H}_{12}\text{N}_4\text{O}$   $[\text{M}+\text{Na}]^+$ : 251.0903; found, 251.0907.

1460

1461 **Compound 40:** (7-nitroindolin-1-yl)(1*H*-1,2,3-triazol-1-yl)methanone.

1462 Compound **40** was synthesized as the same method as compound **17**. The carbamoyl chloride  
1463 intermediate was obtained with 7-nitroindoline (929 mg, 5.7 mmol), *N,N*-diisopropylethylamine  
1464 (2.19 g, 17.0 mmol), triphosgene (672 mg, 2.3 mmol) and THF (15 mL). Then the compound **40**  
1465 (51 mg, 3%) was obtained as a white solid with the carbamoyl chloride intermediate, THF (15  
1466 mL), *N,N*-diisopropylethylamine (2.19 g, 17.0 mmol), 1*H*-1,2,3-triazole (469 mg, 6.8 mmol) and  
1467 DMAP (cat.).  $^1\text{H}$  NMR (500 MHz,  $\text{CDCl}_3$ ):  $\delta$  8.31 (d,  $J = 1.1$  Hz, 1H), 7.82 (dd,  $J = 7.7, 1.1$  Hz,  
1468 1H), 7.77 (d,  $J = 1.1$  Hz, 1H), 7.55 (dd,  $J = 7.4, 1.1$  Hz, 1H), 7.30 (t,  $J = 7.7$  Hz, 1H), 4.68 (t,  $J =$   
1469 8.0 Hz, 2H), 3.31 (t,  $J = 8.0$  Hz, 2H).  $^{13}\text{C}$  NMR (125 MHz,  $\text{CDCl}_3$ ):  $\delta$  147.36, 140.40, 136.95,  
1470 134.62, 133.47, 129.59, 126.03, 124.79, 123.36, 54.26, 29.42. HRMS ( $m/z$ ): calcd. for  
1471  $\text{C}_{11}\text{H}_9\text{N}_5\text{O}_3$   $[\text{M}+\text{Na}]^+$ : 282.0598; found, 282.0602.

1472

1473 **Compound 41:** (7-chloroindolin-1-yl)(1*H*-1,2,3-triazol-1-yl)methanone.

1474 Compound **41** was synthesized as the same method as compound **17**. The carbamoyl chloride  
1475 intermediate was obtained with 7-chloroindoline (713 mg, 4.6 mmol), *N,N*-diisopropylethylamine  
1476 (1.80 g, 13.9 mmol), triphosgene (551 mg, 1.9 mmol) and THF (5 mL). Then the compound **40**  
1477 (587 mg, 51%) was obtained as a white solid with the carbamoyl chloride intermediate, THF (5



1478 mL), *N,N*-diisopropylethylamine (1.80 g, 13.9 mmol), 1*H*-1,2,3-triazole (385 mg, 5.6 mmol) and  
1479 DMAP (cat.). <sup>1</sup>H NMR (500 MHz, CDCl<sub>3</sub>): δ 8.34 (d, *J* = 1.1 Hz, 1H), 7.78 (d, *J* = 1.1 Hz, 1H),  
1480 7.28 (d, *J* = 7.4 Hz, 1H), 7.22 (dd, *J* = 7.4, 1.1 Hz, 1H), 7.14 (t, *J* = 7.7 Hz, 1H), 4.46 (t, *J* = 7.7  
1481 Hz, 2H), 3.20 (t, *J* = 7.7 Hz, 2H). <sup>13</sup>C NMR (125 MHz, CDCl<sub>3</sub>): δ 146.32, 139.04, 136.70, 133.40,  
1482 129.30, 127.11, 124.48, 124.29, 123.26, 54.94, 30.50. HRMS (*m/z*): calcd. for C<sub>11</sub>H<sub>9</sub>N<sub>4</sub>OCl  
1483 [M+Na]<sup>+</sup>: 271.0357; found, 271.0362.

1484

1485 **KK182 (42)**: The mixture of (1*H*-1,2,3-triazol-1-yl)(4-(4-(trifluoromethyl)benzyl)piperazin-1-  
1486 yl)methanone (N1-isomer) and (2*H*-1,2,3-triazol-1-yl)(4-(4-(trifluoromethyl)benzyl)piperazin-1-  
1487 yl)methanone (N2-isomer).

1488 **KK182 (42)** was synthesized as the same method as compound **17**. The carbamoyl chloride  
1489 intermediate was obtained with 1-(4-trifluoromethylbenzyl)piperazine (1 g, 4.1 mmol), *N,N*-  
1490 diisopropylethylamine (1.59 g, 12.3 mmol), triphosgene (486 mg, 1.6 mmol) and THF (5 mL).  
1491 Then the compound **42** with the carbamoyl chloride intermediate, THF (5 mL), *N,N*-  
1492 diisopropylethylamine (1.59 g, 12.3 mmol), 1*H*-1,2,3-triazole (339 mg, 4.9 mmol) and DMAP  
1493 (cat.). Then the mixture was further purified on a silica gel column (Hexane:CH<sub>2</sub>Cl<sub>2</sub>:EtOAc =  
1494 1:4:0.4 to 0:4:0.4) giving KK182-N1 (260 mg, 19%) as a white solid and KK094-N2 (97 mg,  
1495 14%) as a white solid.

1496 **KK 182-N1**: <sup>1</sup>H -NMR (500 MHz, CDCl<sub>3</sub>) δ 8.18 (d, *J* = 1.3 Hz, 1H), 7.73 (d, *J* = 1.3 Hz, 1H),  
1497 7.60 (d, *J* = 8.1 Hz, 2H), 7.47 (d, *J* = 8.1 Hz, 2H), 4.10-3.71 (m, 4H), 3.62 (d, *J* = 5.3 Hz, 2H),  
1498 2.71-2.49 (m, 4H). <sup>13</sup>C -NMR (126 MHz, CDCl<sub>3</sub>) δ 148.05, 141.61, 132.91, 129.67(q, *J* = 32.4  
1499 Hz), 129.16, 125.36, 125.32, 124.11(q, *J* = 271.8 Hz), 62.07, 52.98, 52.39, 47.86, 45.53. HRMS  
1500 (*m/z*): calcd. for C<sub>15</sub>H<sub>16</sub>N<sub>5</sub>OF<sub>3</sub> [M+H]<sup>+</sup>: 340.1380; found, 340.1392.

1501 **KK 182-N2**: <sup>1</sup>H -NMR (500 MHz, CDCl<sub>3</sub>) δ 7.81 (s, 2H), 7.59 (d, *J* = 8.0 Hz, 2H), 7.47 (d, *J* =  
1502 8.0 Hz, 2H), 3.95-3.64 (4H), 3.61 (s, 2H), 2.72-2.37 (m, 4H). <sup>13</sup>C -NMR (126 MHz, CDCl<sub>3</sub>) δ  
1503 148.95, 141.77, 136.01, 129.64 (q, *J* = 32.4 Hz), 129.13, 125.32 (q, *J* = 3.8 Hz), 124.13 (q, *J* =  
1504 272.8 Hz), 62.11, 52.74, 47.67, 45.28. HRMS (*m/z*): calcd. for C<sub>15</sub>H<sub>16</sub>N<sub>5</sub>OF<sub>3</sub> [M+H]<sup>+</sup>: 340.1380;  
1505 found, 340.1390.

1506

1507
